# Supplementary material for: Oxidative C(sp3)–H functionalization of acetonitrile and alkanes with allylic alcohols under metal-free conditions
Source: Royal Society of Chemistry journal article supplement (doi:10.1039/c4qo00314d), 2015-01-01

# Supporting Information

## **Oxidative C(sp<sup>3</sup>)-H Functionalization of Acetonitrile and Alkanes with Allylic Alcohols Under Metal-Free Conditions**

Xue-Qiang Chu, Hua Meng, You Zi, Xiao-Ping Xu,\* Shun-Jun Ji\*

*Key Laboratory of Organic Synthesis of Jiangsu Province, College of Chemistry,  
Chemical Engineering and Materials Science & Collaborative Innovation Center of  
Suzhou Nano Science and Technology, Soochow University, Suzhou, 215123,  
People's Republic of China.  
Fax : (+86)-512-65880307; phone: (+86)- 512-65880307; E-mail: [xuxp@suda.edu.cn](mailto:xuxp@suda.edu.cn);  
[shunjun@suda.edu.cn](mailto:shunjun@suda.edu.cn)*

## **Table of Contents**

|                                                                                                      |          |
|------------------------------------------------------------------------------------------------------|----------|
| General information                                                                                  | page S2  |
| General procedure for oxidative addition of acetonitrile to $\alpha,\alpha$ -diaryl allylic alcohols | page S2  |
| General procedure for oxidative addition of alkanes to $\alpha,\alpha$ -diaryl allylic alcohols      | page S2  |
| General procedure for the synthesis of <b>6</b>                                                      | page S2  |
| General procedure for the synthesis of <b>7</b>                                                      | page S2  |
| Analytical and spectral data for compounds                                                           | page S3  |
| The <sup>1</sup> H and <sup>13</sup> C NMR spectra of compounds                                      | page S11 |

---

## EXPERIMENTAL SECTION

**General Information:** Unless otherwise stated, all reagents were purchased from commercial suppliers and used without further purification. All reactions were carried out in air and using undistilled solvent, without need of precautions to exclude air and moisture unless otherwise noted. Melting points were recorded on an Electrothermal digital melting point apparatus. IR spectra were recorded on a FT-IR spectrophotometer using KBr optics.  $^1\text{H}$ ,  $^{13}\text{C}$  NMR spectra were recorded in  $\text{CDCl}_3$  on 400 MHz spectrometers. Tetramethylsilane (TMS) served as internal standard for  $^1\text{H}$  NMR and  $^{13}\text{C}$  NMR. High resolution mass spectra were obtained using a commercial apparatus (ESI or EI Source).

### General procedure for oxidative addition of acetonitrile to $\alpha,\alpha$ -diaryl allylic alcohols:

$\alpha,\alpha$ -diaryl allylic alcohol **1** (0.3 mmol), nitrile **2** (3 mL) and *tert*-butylperoxybenzoate (0.6 mmol) was stirred at 120 °C for 12 h. Upon completion of the reaction (indicated by TLC), solvent was removed in vacuum and the residue was purified by flash silica gel column chromatography purification afforded pure product **4** with petroleum ether/ethyl acetate as the eluent.

### General procedure for oxidative addition of alkanes to $\alpha,\alpha$ -diaryl allylic alcohols:

$\alpha,\alpha$ -diaryl allylic alcohol **1** (0.3 mmol), alkane **3** (4 mL) and *tert*-butylperoxybenzoate (0.6 mmol) was stirred at 120 °C for 7 h. Upon completion of the reaction (indicated by TLC), solvent was removed in vacuum and the residue was purified by flash silica gel column chromatography purification to afford pure product **5** with petroleum ether/ethyl acetate as the eluent.

**General procedure for the synthesis of 6:** 5-oxo-4,5-diphenylpentanenitrile **4aa** (0.5 mmol), concentrated sulfuric acid (0.55 mmol) in 3 mL glacial acetic acid was stirred at refluxing over night. Upon completion of the reaction (indicated by TLC), a saturated aqueous  $\text{NaHCO}_3$  solution was added and the mixture was extracted with ethyl acetate (5 mL $\times$ 3). The combined organic extracts were dried with sodium sulfate and concentrated. The pure product **6** was obtained after purification (silica gel, methyl alcohol/chloroform, 1:10).

**General procedure for the synthesis of 7:** 0.5 mmol of 5-oxo-4,5-diphenylpentanenitrile **4aa** was dissolved in 10.0 mL dry THF. Then 2.5 mmol of  $\text{LiAlH}_4$  was added at room temperature. After 10 minutes, the reaction mixture was heated to reflux for 1h. Upon completion of the reaction (indicated by TLC), a saturated aqueous  $\text{NH}_4\text{Cl}$  solution was added and the mixture was extracted with ethyl acetate (5 mL $\times$ 3). The combined organic extracts were dried with sodium sulfate and concentrated. The pure product **7** was obtained after purification (silica gel, petroleum ether/ethyl acetate).

---

**Analytical and spectral data for compounds:**

**5-oxo-4,5-diphenylpentanenitrile (4aa):** Yield = 87% (65 mg). Yellow solid (M.p. 83.1–83.8 °C). IR (KBr)  $\nu$  = 2938, 2246, 1667, 1595, 1448, 1263, 1199, 988, 754, 694, 661  $\text{cm}^{-1}$ .  $^1\text{H}$  NMR (400MHz,  $\text{CDCl}_3$ ):  $\delta$  = 7.98–7.93 (m, 2H), 7.52–7.46 (m, 1H), 7.41–7.36 (m, 2H), 7.35–7.29 (m, 4H), 7.27–7.23 (m, 1H), 4.73 (t,  $J$  = 7.2 Hz, 1H), 2.49–2.35 (m, 2H), 2.30–2.15 (m, 2H) ppm.  $^{13}\text{C}$  NMR (100 MHz,  $\text{CDCl}_3$ ):  $\delta$  = 198.4, 137.7, 136.2, 133.5, 129.6, 129.0, 128.8, 128.3, 128.0, 119.5, 52.1, 29.2, 15.4 ppm. HRMS  $m/z$ : calcd for  $\text{C}_{17}\text{H}_{16}\text{NO}$   $[\text{M}+\text{H}]^+$  250.1232, found: 250.1229.

**4,5-bis(4-fluorophenyl)-5-oxopentanenitrile (4ba):** Yield = 81% (72 mg). Yellow oil. IR (KBr)  $\nu$  = 2955, 2924, 2246, 1684, 1595, 1507, 1257, 1222, 1152, 830, 766  $\text{cm}^{-1}$ .  $^1\text{H}$  NMR (400MHz,  $\text{CDCl}_3$ ):  $\delta$  = 8.00–7.93 (m, 2H), 7.30–7.25 (m, 2H), 7.12–6.97 (m, 4H), 4.69 (t,  $J$  = 7.2 Hz, 1H), 2.49–2.38 (m, 2H), 2.31–2.20 (m, 1H), 2.20–2.09 (m, 1H) ppm.  $^{13}\text{C}$  NMR (100 MHz,  $\text{CDCl}_3$ ):  $\delta$  = 196.7, 166.0 (d,  $J_{\text{C-F}}$  = 254.5 Hz), 162.5 (d,  $J_{\text{C-F}}$  = 246.1 Hz), 133.3 (d,  $J_{\text{C-F}}$  = 3.3 Hz), 132.3 (d,  $J_{\text{C-F}}$  = 3.1 Hz), 131.7 (d,  $J_{\text{C-F}}$  = 9.4 Hz), 129.9 (d,  $J_{\text{C-F}}$  = 8.1 Hz), 119.3, 116.7 (d,  $J_{\text{C-F}}$  = 21.5 Hz), 116.1 (d,  $J_{\text{C-F}}$  = 21.8 Hz), 51.2, 29.2, 15.3 ppm. HRMS  $m/z$ : calcd for  $\text{C}_{17}\text{H}_{14}\text{F}_2\text{NO}$   $[\text{M}+\text{H}]^+$  286.1043, found: 286.1051.

**4,5-bis(4-chlorophenyl)-5-oxopentanenitrile (4ca):** Yield = 82% (79 mg). Yellow oil. IR (KBr)  $\nu$  = 2969, 2926, 2246, 1679, 1587, 1489, 1399, 1091, 1031, 806, 743  $\text{cm}^{-1}$ .  $^1\text{H}$  NMR (400MHz,  $\text{CDCl}_3$ ):  $\delta$  = 7.89–7.83 (m, 2H), 7.41–7.35 (m, 2H), 7.34–7.29 (m, 2H), 7.25–7.19 (m, 2H), 4.67 (t,  $J$  = 7.2 Hz, 1H), 2.49–2.37 (m, 2H), 2.31–2.20 (m, 1H), 2.19–2.08 (m, 1H) ppm.  $^{13}\text{C}$  NMR (100 MHz,  $\text{CDCl}_3$ ):  $\delta$  = 196.8, 140.3, 135.9, 134.3, 134.2, 130.4, 130.0, 129.6, 129.3, 119.2, 51.4, 29.0, 15.4 ppm. HRMS  $m/z$ : calcd for  $\text{C}_{17}\text{H}_{14}\text{Cl}_2\text{NO}$   $[\text{M}+\text{H}]^+$  318.0452, found: 318.0450.

**4,5-bis(4-bromophenyl)-5-oxopentanenitrile (4da):** Yield = 77% (93 mg). Yellow oil. IR (KBr)  $\nu$  = 2938, 2245, 1678, 1583, 1486, 1395, 1257, 1173, 1070, 1009, 802, 733  $\text{cm}^{-1}$ .  $^1\text{H}$  NMR (400MHz,  $\text{CDCl}_3$ ):  $\delta$  = 7.81–7.75 (m, 2H), 7.57–7.52 (m, 2H), 7.49–7.44 (m, 2H), 7.18–7.14 (m, 2H), 4.65 (t,  $J$  = 7.2 Hz, 1H), 2.49–2.37 (m, 2H), 2.30–2.20 (m, 1H), 2.18–2.08 (m, 1H) ppm.  $^{13}\text{C}$  NMR (100 MHz,  $\text{CDCl}_3$ ):  $\delta$  = 197.0, 136.4, 134.6, 132.9, 132.3, 130.5, 129.9, 129.1, 122.4, 119.2, 51.5, 28.9, 15.4 ppm. HRMS  $m/z$ : calcd for  $\text{C}_{17}\text{H}_{14}\text{Br}_2\text{NO}$   $[\text{M}+\text{H}]^+$  405.9442, found: 405.9436.

**5-oxo-4,5-dip-tolylpentanenitrile (4ea):** Yield = 69% (58 mg). Yellow oil. IR (KBr)  $\nu$  = 2942, 2867, 2244, 1673, 1605, 1510, 1261, 1174, 962, 808, 756  $\text{cm}^{-1}$ .  $^1\text{H}$  NMR (400MHz,  $\text{CDCl}_3$ ):  $\delta$  = 7.88–7.83 (m, 2H), 7.20–7.15 (m, 4H), 7.14–7.09 (m, 2H), 4.67 (t,  $J$  = 7.1 Hz, 1H), 2.47–2.36 (m, 2H), 2.34 (s, 3H), 2.28 (s, 3H), 2.27–2.10 (m, 2H) ppm.  $^{13}\text{C}$  NMR (100 MHz,  $\text{CDCl}_3$ ):  $\delta$  = 198.1, 144.3, 137.7, 134.9, 133.7, 130.3, 129.5, 129.1, 128.2, 119.6, 51.6, 29.2, 21.8, 21.2, 15.4 ppm. HRMS  $m/z$ : calcd for  $\text{C}_{19}\text{H}_{20}\text{NO}$   $[\text{M}+\text{H}]^+$  278.1545, found: 278.1540.

**4,5-bis(4-methoxyphenyl)-5-oxopentanenitrile (4fa):** Yield = 58% (61 mg). Yellow oil. IR (KBr)  $\nu$  = 2957, 2838, 2244, 1668, 1597, 1509, 1246, 1165, 1027, 832, 817  $\text{cm}^{-1}$ .  $^1\text{H}$  NMR (400MHz,  $\text{CDCl}_3$ ):  $\delta$  = 7.98–7.91 (m, 2H), 7.25–7.19 (m, 2H), 6.89–6.82 (m, 4H), 4.63 (t,  $J$  = 7.2 Hz, 1H), 3.82 (s, 3H), 3.76 (s, 3H), 2.46–2.35 (m, 2H), 2.30–2.19 (m, 1H), 2.19–2.08 (m, 1H) ppm.  $^{13}\text{C}$  NMR (100 MHz,  $\text{CDCl}_3$ ):  $\delta$  = 197.1, 163.8, 159.2, 131.4, 130.1, 129.3, 129.2, 119.7, 115.0, 114.0, 55.7, 55.5, 50.9, 29.2, 15.4 ppm. HRMS  $m/z$ : calcd for  $\text{C}_{19}\text{H}_{20}\text{NO}_3$   $[\text{M}+\text{H}]^+$  310.1443, found: 310.1431.

**5-oxo-4,5-bis(3-(trifluoromethyl)phenyl)pentanenitrile (4ga):** Yield = 71% (83 mg). Yellow oil. IR (KBr)  $\nu$  = 2970, 2901, 2248, 1687, 1327, 1252, 1164, 1119, 804, 692  $\text{cm}^{-1}$ .  $^1\text{H}$  NMR (400MHz,  $\text{CDCl}_3$ ):  $\delta$  = 8.21 (s, 1H),

8.11 (d,  $J = 7.9$  Hz, 1H), 7.79 (d,  $J = 7.8$  Hz, 1H), 7.60–7.47 (m, 5H), 4.82 (t,  $J = 7.3$  Hz, 1H), 2.59–2.42 (m, 2H), 2.35–2.17 (m, 2H) ppm.  $^{13}\text{C}$  NMR (100 MHz,  $\text{CDCl}_3$ ):  $\delta = 196.5, 138.1, 136.2, 132.4, 132.1, 132.0$  (d,  $J_{\text{C-F}} = 0.9$  Hz), 131.9, 131.7 (d,  $J_{\text{C-F}} = 0.9$  Hz), 131.6, 130.4, 130.3 (dd,  $J_{\text{C-F}} = 7.2, 3.4$  Hz), 129.8, 125.9 (dd,  $J_{\text{C-F}} = 7.5, 3.8$  Hz), 125.4 (dd,  $J_{\text{C-F}} = 7.4, 3.7$  Hz), 124.9 (dd,  $J_{\text{C-F}} = 7.2, 3.7$  Hz), 119.0, 51.94, 29.12, 15.42 ppm. HRMS  $m/z$ : calcd for  $\text{C}_{19}\text{H}_{14}\text{F}_6\text{NO}$   $[\text{M}+\text{H}]^+$  386.0980, found: 386.0979

**5-(4-(benzyloxy)phenyl)-5-oxo-4-phenylpentanenitrile (4ha)** and  
**4-(4-(benzyloxy)phenyl)-5-oxo-5-phenylpentanenitrile (4ha')**: Yield = 72% (3.7:1, 78 mg). Yellow oil. IR (KBr)  $\nu = 3029, 2931, 2244, 1671, 1597, 1508, 1248, 1165, 1002, 738, 697$   $\text{cm}^{-1}$ . The  $^1\text{H}$  NMR spectrum of the isolated product showed a 3.7:1 mixture of **4ha** and its isomer **4ha'**.  $^1\text{H}$  NMR (400MHz,  $\text{CDCl}_3$ ):  $\delta = 7.97\text{--}7.91$  (m, 2H), 7.40–7.35 (m, 4H), 7.35–7.20 (m, 6H), 6.97–6.89 (m, 2H), 5.08–4.98 (m, 2H), 4.67 (t,  $J = 7.2$  Hz, 1H), 2.48–2.33 (m, 2H), 2.28–2.12 (m, 2H) ppm.  $^{13}\text{C}$  NMR (100 MHz,  $\text{CDCl}_3$ ) major product **4ha**:  $\delta = 196.8, 162.9, 138.17, 136.2, 133.4, 131.4, 129.6, 128.9, 128.4, 128.2, 127.9, 127.6, 119.6, 114.8, 70.3, 51.7, 29.3, 15.4$  ppm. HRMS  $m/z$ : calcd for  $\text{C}_{24}\text{H}_{22}\text{NO}_2$   $[\text{M}+\text{H}]^+$  356.1651, found: 356.1650.

**5-(3,4-dimethylphenyl)-5-oxo-4-phenylpentanenitrile (4ia)** and  
**4-(3,4-dimethylphenyl)-5-oxo-5-phenylpentanenitrile (4ia')**: Yield = 73% (1.9:1, 62 mg). Yellow oil. IR (KBr)  $\nu = 2920, 2850, 2244, 1673, 1603, 1448, 1259, 1132, 983, 731, 700$   $\text{cm}^{-1}$ . The  $^1\text{H}$  NMR spectrum of the isolated product showed a 1.9:1 mixture of **4ia** and its isomer **4ia'**.  $^1\text{H}$  NMR (400MHz,  $\text{CDCl}_3$ ):  $\delta = 7.99\text{--}7.93$  (m, 0.7H), 7.75–7.73 (m, 0.6H), 7.71–7.66 (m, 0.6H), 7.51–7.45 (m, 0.4H), 7.41–7.35 (m, 0.7H), 7.34–7.28 (m, 2.6H), 7.25–7.20 (m, 0.7H), 7.15–7.01 (m, 1.7H), 4.71 (t,  $J = 7.3$  Hz, 0.65H), 4.68–4.62 (t,  $J = 7.3$  Hz, 0.35H), 2.48–2.34 (m, 2H), 2.30–2.13 (m, 8H) ppm.  $^{13}\text{C}$  NMR (100 MHz,  $\text{CDCl}_3$ ) **4ia** and its isomer **4ia'**:  $\delta = 198.5, 198.2, 143.2, 138.1, 137.9, 137.2, 136.4, 136.2, 135.0, 134.0, 133.4, 130.7, 130.1, 130.0, 129.5, 129.2, 129.0, 128.8, 128.3, 127.9, 126.8, 125.8, 119.6, 119.6, 51.9, 51.7, 29.2, 29.2, 20.2, 20.0, 20.0, 19.6, 15.4, 15.4$  ppm. HRMS  $m/z$ : calcd for  $\text{C}_{19}\text{H}_{20}\text{NO}$   $[\text{M}+\text{H}]^+$  278.1545, found: 278.1550.

**4-(4-bromophenyl)-5-oxo-5-phenylpentanenitrile (4ja)** and **5-(4-bromophenyl)-5-oxo-4-phenylpentanenitrile (4ja')**: Yield = 65% (2.7:1, 65 mg). Yellow oil. IR (KBr)  $\nu = 2923, 2851, 2245, 1678, 1582, 1486, 1477, 1258, 1072, 1009, 807, 701$   $\text{cm}^{-1}$ . The  $^1\text{H}$  NMR spectrum of the isolated product showed a 2.7:1 mixture of **4ja** and its isomer **4ja'**.  $^1\text{H}$  NMR (400MHz,  $\text{CDCl}_3$ ):  $\delta = 7.95\text{--}7.90$  (m, 1.4H), 7.82–7.78 (m, 0.5H), 7.55–7.49 (m, 1.2H), 7.48–7.44 (m, 1.5H), 7.43–7.38 (m, 1.5H), 7.36–7.30 (m, 0.6H), 7.28–7.25 (m, 0.9H), 7.21–7.17 (m, 1.4H), 4.72 (t,  $J = 7.2$  Hz, 0.73H), 4.65 (t,  $J = 7.1$  Hz, 0.27H), 2.52–2.36 (m, 2H), 2.32–2.11 (m, 2H) ppm.  $^{13}\text{C}$  NMR (100 MHz,  $\text{CDCl}_3$ ) **4ja** and its isomer **4ja'**:  $\delta = 198.0, 197.4, 137.4, 136.7, 136.2, 135.9, 134.8, 133.8, 132.8, 132.2, 130.5, 130.0, 129.8, 129.0, 128.3, 128.2, 122.15, 119.3, 52.2, 51.4, 29.0, 15.4, 15.3$  ppm. HRMS  $m/z$ : calcd for  $\text{C}_{17}\text{H}_{15}\text{BrNO}$   $[\text{M}+\text{H}]^+$  328.0337, found: 328.0341.

**5-oxo-5-phenyl-4-(3-(trifluoromethyl)phenyl)pentanenitrile (4ka)** and  
**5-oxo-4-phenyl-5-(3-(trifluoromethyl)phenyl)pentanenitrile (4ka')**: Yield = 79% (3.5:1, 76 mg). Yellow oil. IR (KBr)  $\nu = 2963, 2920, 2247, 1681, 1448, 1327, 1164, 1121, 1073, 802, 701, 686$   $\text{cm}^{-1}$ . The  $^1\text{H}$  NMR spectrum of the isolated product showed a 3.5:1 mixture of **4ka** and its isomer **4ka'**.  $^1\text{H}$  NMR (400MHz,  $\text{CDCl}_3$ ):  $\delta = 8.21\text{--}7.93$  (m, 1.9H), 7.76–7.71 (m, 0.3H), 7.60–7.51 (m, 3.3H), 7.49–7.40 (m, 2.4H), 7.37–7.32 (m, 0.5H), 7.31–7.26 (m, 0.6H), 4.85 (t,  $J = 7.4$  Hz, 0.78H), 4.70 (t,  $J = 7.4$  Hz, 0.22H), 2.58–2.38 (m, 2H), 2.34–2.13 (m, 2H). ppm.  $^{13}\text{C}$  NMR (100 MHz,  $\text{CDCl}_3$ ) major product **4ka**:  $\delta = 197.8, 138.8, 135.8, 133.9, 132.1, 131.81, 130.1, 129.9, 129.1, 129.0, 128.3, 125.0$  (m), 119.1, 51.6, 29.3, 15.5 ppm. HRMS  $m/z$ : calcd for  $\text{C}_{18}\text{H}_{15}\text{F}_3\text{NO}$   $[\text{M}+\text{H}]^+$  318.1106, found: 318.1114.

**5-oxo-5-phenyl-4-(pyridin-3-yl)pentanenitrile (4la):** Yield = 59% (45 mg). Yellow oil. IR (KBr)  $\nu$  = 2958, 2923, 2853, 2245, 1678, 1595, 1447, 1424, 1264, 1236, 1176, 1026, 801, 705, 686  $\text{cm}^{-1}$ .  $^1\text{H}$  NMR (400MHz,  $\text{CDCl}_3$ ):  $\delta$  = 8.66 (d,  $J$  = 1.9 Hz, 1H), 8.56–8.50 (m, 1H), 7.99–7.92 (m, 2H), 7.67–7.60 (m, 1H), 7.57–7.52 (m, 1H), 7.47–7.40 (m, 2H), 7.29–7.26 (m, 1H), 4.82 (t,  $J$  = 7.4 Hz, 1H), 2.59–2.40 (m, 2H), 2.37–2.28 (m, 1H), 2.22–2.12 (m, 1H) ppm.  $^{13}\text{C}$  NMR (100 MHz,  $\text{CDCl}_3$ ):  $\delta$  = 197.7, 149.9, 149.4, 135.7, 135.5, 134.0, 133.7, 129.1, 129.0, 124.4, 119.0, 49.2, 29.2, 15.5 ppm. HRMS  $m/z$ : calcd for  $\text{C}_{16}\text{H}_{15}\text{N}_2\text{O}$   $[\text{M}+\text{H}]^+$  251.1184, found: 251.1180.

**5-(2-fluorophenyl)-5-oxo-4-phenylpentanenitrile (4ma) and 4-(2-fluorophenyl)-5-oxo-5-phenylpentanenitrile (4ma'):** Yield = 82% (2.6:1, 65 mg). Yellow oil. IR (KBr)  $\nu$  = 2969, 2926, 2245, 1681, 1608, 1481, 1449, 1275, 1227, 759, 700  $\text{cm}^{-1}$ . The  $^1\text{H}$  NMR spectrum of the isolated product showed a 2.6:1 mixture of **4ma** and its isomer **4ma'**.  $^1\text{H}$  NMR (400MHz,  $\text{CDCl}_3$ ):  $\delta$  = 7.97–7.92 (m, 0.5H), 7.78–7.72 (m, 0.7H), 7.54–7.37 (m, 1.9H), 7.32–7.27 (m, 1.5H), 7.26–7.21 (m, 2.1H), 7.17–7.00 (m, 2.3H), 5.06 (t,  $J$  = 7.2 Hz, 0.28H), 4.64 (t,  $J$  = 7.2 Hz, 0.72H), 2.56–2.46 (m, 1H), 2.42–2.35 (m, 1H), 2.31–2.08 (m, 2H) ppm.  $^{13}\text{C}$  NMR (100 MHz,  $\text{CDCl}_3$ ) major product **4ma**:  $\delta$  = 197.5 (d,  $J_{\text{C-F}}$  = 4.4 Hz), 161.2 (d,  $J_{\text{C-F}}$  = 253.3 Hz), 136.6, 134.9 (d,  $J_{\text{C-F}}$  = 9.0 Hz), 133.7, 131.2 (d,  $J_{\text{C-F}}$  = 2.5 Hz), 129.3, 128.7 (d,  $J_{\text{C-F}}$  = 0.5 Hz), 128.1, 124.7 (d,  $J_{\text{C-F}}$  = 3.5 Hz), 119.4, 116.9 (d,  $J_{\text{C-F}}$  = 23.7 Hz), 56.1 (d,  $J_{\text{C-F}}$  = 6.6 Hz), 28.9, 15.4 ppm. HRMS  $m/z$ : calcd for  $\text{C}_{17}\text{H}_{15}\text{FNO}$   $[\text{M}+\text{H}]^+$  268.1138, found: 268.1144.

**5-(2-chlorophenyl)-4-(4-chlorophenyl)-5-oxopentanenitrile (4na):** Yield = 49% (47 mg). Yellow oil. IR (KBr)  $\nu$  = 2967, 2919, 2246, 1697, 1490, 1432, 1091, 1014, 809, 741  $\text{cm}^{-1}$ .  $^1\text{H}$  NMR (400MHz,  $\text{CDCl}_3$ ):  $\delta$  = 7.39–7.32 (m, 2H), 7.31–7.26 (m, 2H), 7.23–7.17 (m, 1H), 7.17–7.11 (m, 3H), 4.61 (t,  $J$  = 7.4 Hz, 1H), 2.61–2.41 (m, 2H), 2.34–2.24 (m, 1H), 2.22–2.10 (m, 1H) ppm.  $^{13}\text{C}$  NMR (100 MHz,  $\text{CDCl}_3$ ):  $\delta$  = 201.4, 138.7, 134.4, 132.0, 130.8, 130.7, 130.1, 129.7, 129.2, 127.0, 119.2, 55.5, 28.0, 15.4 ppm. HRMS  $m/z$ : calcd for  $\text{C}_{17}\text{H}_{14}\text{Cl}_2\text{NO}$   $[\text{M}+\text{H}]^+$  318.0452, found: 318.0453.

**2-(2-benzoyl-2-phenyltetrahydro-2H-pyran-3-yl)acetonitrile (4pa):** Yield = 33% (35 mg). White solid (M.p. 93.2–94.8  $^{\circ}\text{C}$ ). IR (KBr)  $\nu$  = 2924, 2853, 2245, 1674, 1274, 1222, 843, 759, 707, 631  $\text{cm}^{-1}$ .  $^1\text{H}$  NMR (400MHz,  $\text{CDCl}_3$ ):  $\delta$  = 7.90–7.81 (m, 2H), 7.47–7.42 (m, 1H), 7.40–7.31 (m, 5H), 7.30–7.25 (m, 2H), 3.94–3.84 (m, 1H), 3.45–3.33 (m, 1H), 3.23–3.13 (m, 1H), 2.42–2.35 (m, 1H), 2.22–2.13 (m, 1H), 2.11–2.01 (m, 1H), 1.98–1.83 (m, 2H), 1.79–1.69 (m, 1H) ppm.  $^{13}\text{C}$  NMR (100 MHz,  $\text{CDCl}_3$ ):  $\delta$  = 201.9, 140.0, 135.1, 133.3, 130.6, 129.0, 128.7, 128.2, 126.0, 119.8, 86.7, 65.4, 46.1, 25.8, 25.6, 20.0 ppm. HRMS  $m/z$ : calcd for  $\text{C}_{20}\text{H}_{20}\text{NO}_2$   $[\text{M}+\text{H}]^+$  306.1494, found: 306.1495.

**2-(2-(4-chlorobenzoyl)-2-(4-chlorophenyl)tetrahydro-2H-pyran-3-yl)acetonitrile (4qa):** Yield = 35% (47 mg). Yellow oil. IR (KBr)  $\nu$  = 2955, 2934, 2246, 1680, 1585, 1488, 1400, 1243, 1090, 1012, 850, 751  $\text{cm}^{-1}$ .  $^1\text{H}$  NMR (400MHz,  $\text{CDCl}_3$ ):  $\delta$  = 7.85–7.79 (m, 2H), 7.38–7.33 (m, 2H), 7.29–7.24 (m, 4H), 3.97–3.88 (m, 1H), 3.41–3.32 (m, 1H), 3.19–3.09 (m, 1H), 2.37–2.30 (m, 1H), 2.22–2.14 (m, 1H), 2.03–1.97 (m, 1H), 1.93–1.85 (m, 2H), 1.78–1.71 (m, 1H) ppm.  $^{13}\text{C}$  NMR (100 MHz,  $\text{CDCl}_3$ ):  $\delta$  = 200.2, 140.1, 138.3, 134.9, 132.9, 132.0, 129.4, 128.7, 127.4, 119.4, 86.2, 77.6, 77.2, 76.9, 65.6, 45.9, 25.7, 25.5, 19.9 ppm. HRMS  $m/z$ : calcd for  $\text{C}_{20}\text{H}_{18}\text{Cl}_2\text{NO}_2$   $[\text{M}+\text{H}]^+$  374.0715, found: 374.0712.

**2-(2-(4-methylbenzoyl)-2-p-tolyltetrahydro-2H-pyran-3-yl)acetonitrile (4ra):** Yield = 29% (30 mg). Yellow oil. IR (KBr)  $\nu$  = 2926, 2856, 2244, 1674, 1604, 1254, 1182, 1077, 1018, 805, 733, 618  $\text{cm}^{-1}$ .  $^1\text{H}$  NMR (400MHz,  $\text{CDCl}_3$ ):  $\delta$  = 7.78 (d,  $J$  = 8.3 Hz, 2H), 7.22–7.12 (m, 4H), 7.07 (d,  $J$  = 8.1 Hz, 2H), 3.92–3.84 (m, 1H), 3.42–3.33 (m, 1H), 3.21–3.11 (m, 1H), 2.45–2.40 (m, 1H), 2.34 (s, 3H), 2.32 (s, 3H), 2.18–2.12 (m, 1H), 2.06–1.98 (m, 1H), 1.96–1.84 (m, 2H), 1.74–1.67 (m, 1H) ppm.  $^{13}\text{C}$  NMR (100 MHz,  $\text{CDCl}_3$ ):  $\delta$  = 201.6, 144.1, 138.4, 137.2, 132.6,

130.7, 129.6, 128.9, 125.9, 120.0, 86.6, 77.6, 77.2, 76.9, 65.4, 46.2, 25.8, 25.6, 21.9, 21.3, 20.0 ppm. HRMS m/z: calcd for C<sub>22</sub>H<sub>24</sub>NO<sub>2</sub> [M+H]<sup>+</sup> 334.1807, found: 334.1808.

**1-(3-oxo-2,3-diphenylpropyl)cyclopropanecarbonitrile (4ab):** Yield = 25% (20 mg). Yellow oil. IR (KBr)  $\nu$  = 2923, 2852, 2234, 1678, 1596, 1447, 1252, 1210, 757, 698 cm<sup>-1</sup>. <sup>1</sup>H NMR (400MHz, CDCl<sub>3</sub>):  $\delta$  = 8.02–7.98 (m, 2H), 7.53–7.47 (m, 1H), 7.43–7.38 (m, 2H), 7.36–7.29 (m, 4H), 7.26–7.21 (m, 1H), 4.98 (dd,  $J$  = 7.9, 6.6 Hz, 1H), 2.54–2.45 (m, 1H), 1.91–1.82 (m, 1H), 1.17–1.09 (1H), 0.99–0.92 (m, 1H), 0.91–0.84 (m, 1H), 0.39–0.32 (m, 1H) ppm. <sup>13</sup>C NMR (100 MHz, CDCl<sub>3</sub>):  $\delta$  = 198.8, 138.4, 136.3, 133.5, 129.4, 129.0, 128.8, 128.4, 127.9, 123.5, 77.6, 77.2, 76.9, 52.2, 38.7, 14.7, 13.8, 8.5 ppm. HRMS m/z: calcd for C<sub>19</sub>H<sub>18</sub>NO [M+H]<sup>+</sup> 276.1388, found: 276.1389.

**2-(3-oxo-2,3-diphenylpropyl)malononitrile (4af):** Yield = 72% (70 mg). Yellow oil. IR (KBr)  $\nu$  = 2918, 2854, 2255, 1677, 1596, 1447, 1262, 1175, 951, 758, 695 cm<sup>-1</sup>. <sup>1</sup>H NMR (400MHz, CDCl<sub>3</sub>):  $\delta$  = 7.96–7.91 (m, 2H), 7.54–7.49 (m, 1H), 7.42–7.34 (m, 4H), 7.32–7.29 (m, 3H), 4.81 (t,  $J$  = 7.6 Hz, 1H), 3.67 (dd,  $J$  = 8.6, 7.5 Hz, 1H), 2.87–2.77 (m, 1H), 2.62–2.53 (m, 1H) ppm. <sup>13</sup>C NMR (100 MHz, CDCl<sub>3</sub>):  $\delta$  = 197.0, 136.0, 135.4, 134.0, 130.2, 129.2, 129.0, 128.9, 128.2, 112.6, 112.4, 50.7, 34.5, 20.9 ppm. HRMS m/z: calcd for C<sub>18</sub>H<sub>15</sub>N<sub>2</sub>O [M+H]<sup>+</sup> 275.1184, found: 275.1181.

**methyl 2-cyano-5-oxo-4,5-diphenylpentanoate (4ag):** Yield = 71% (dr = 1:1, 67 mg). Yellow oil. IR (KBr)  $\nu$  = 2956, 2901, 2250, 1746, 1678, 1447, 1258, 1176, 757, 697 cm<sup>-1</sup>. <sup>1</sup>H NMR (400MHz, CDCl<sub>3</sub>):  $\delta$  = 7.95 (d,  $J$  = 7.8 Hz, 2H), 7.52–7.46 (m, 1H), 7.41–7.37 (m, 2H), 7.36–7.28 (m, 5H), 4.91–4.79 (m, 1H), 3.76 (s, 1.5H), 3.73 (s, 1.5H), 3.69–3.63 (m, 0.5H), 3.30–3.24 (m, 0.5H), 2.92–2.83 (m, 0.5H), 2.69–2.55 (m, 1H), 2.41–2.32 (m, 0.5H) ppm. <sup>13</sup>C NMR (100 MHz, CDCl<sub>3</sub>):  $\delta$  = 198.0, 197.7, 166.5, 166.3, 137.5, 136.7, 135.9, 135.9, 133.6, 133.5, 129.8, 129.6, 129.1, 129.0, 128.9, 128.8, 128.4, 128.4, 128.4, 128.1, 116.4, 116.4, 53.7, 53.7, 51.0, 50.9, 35.6, 35.5, 33.5, 33.4 ppm. HRMS m/z: calcd for C<sub>19</sub>H<sub>18</sub>NO<sub>3</sub> [M+H]<sup>+</sup> 308.1287, found: 308.1295.

**2-benzoyl-5-oxo-4,5-diphenylpentanenitrile (4ah):** Yield = 53% (dr = 1:1, 56 mg). Yellow oil. IR (KBr)  $\nu$  = 2925, 2854, 2248, 1678, 1596, 1447, 1265, 1001, 757, 693 cm<sup>-1</sup>. <sup>1</sup>H NMR (400MHz, CDCl<sub>3</sub>):  $\delta$  = 8.14–8.09 (m, 1H), 8.03–7.99 (m, 1H), 7.96–7.92 (m, 1H), 7.69–7.65 (m, 1H), 7.60–7.56 (m, 1H), 7.54–7.49 (m, 1H), 7.45–7.36 (m, 5H), 7.31–7.26 (m, 2H), 7.26–7.18 (m, 2H), 5.04–4.84 (m, 1H), 4.65–4.56 (m, 0.5H), 4.13–4.06 (m, 0.5H), 2.99–2.89 (m, 0.5H), 2.72–2.56 (m, 1H), 2.30–2.22 (m, 0.5H) ppm. <sup>13</sup>C NMR (100 MHz, CDCl<sub>3</sub>):  $\delta$  = 198.8, 197.9, 190.8, 190.7, 138.0, 137.1, 136.0, 135.9, 134.9, 134.7, 133.9, 133.8, 133.8, 133.6, 129.9, 129.7, 129.4, 129.3, 129.2, 129.1, 129.0, 128.9, 128.9, 128.6, 128.2, 128.1, 117.4, 117.3, 51.6, 51.3, 39.3, 38.2, 34.4, 33.9 ppm. HRMS m/z: calcd for C<sub>24</sub>H<sub>20</sub>NO<sub>2</sub> [M+H]<sup>+</sup> 354.1494, found: 354.1494.

**3-cyclohexyl-1,2-diphenylpropan-1-one (5aa):** Yield = 96% (87 mg). White solid (M.p. 64.2–65.6 °C). IR (KBr)  $\nu$  = 2922, 2848, 1673, 1596, 1493, 1445, 1228, 999, 941, 758, 733, 695, 652 cm<sup>-1</sup>. <sup>1</sup>H NMR (400MHz, CDCl<sub>3</sub>):  $\delta$  = 7.99–7.94 (m, 2H), 7.51–7.45 (m, 1H), 7.42–7.36 (m, 2H), 7.32–7.25 (m, 4H), 7.22–7.16 (m, 1H), 4.72 (t,  $J$  = 7.3 Hz, 1H), 2.17–2.07 (m, 1H), 1.85–1.79 (m, 1H), 1.74–1.60 (m, 5H), 1.26–1.10 (m, 4H), 0.99–0.88 (m, 2H) ppm. <sup>13</sup>C NMR (100 MHz, CDCl<sub>3</sub>):  $\delta$  = 200.3, 140.2, 137.2, 133.0, 129.1, 128.8, 128.7, 128.5, 127.1, 50.7, 41.9, 35.5, 33.8, 33.5, 26.7, 26.4, 26.4 ppm. HRMS m/z: calcd for C<sub>21</sub>H<sub>25</sub>O [M+H]<sup>+</sup> 293.1905, found: 293.1906.

**3-cyclohexyl-1,2-bis(4-fluorophenyl)propan-1-one (5ba):** Yield = 64% (63 mg). Colorless oil. IR (KBr)  $\nu$  = 2922, 2850, 1681, 1505, 1408, 1225, 1154, 831, 770 cm<sup>-1</sup>. <sup>1</sup>H NMR (400MHz, CDCl<sub>3</sub>):  $\delta$  = 8.01–7.95 (m, 2H), 7.28–7.23 (m, 2H), 7.11–7.04 (m, 2H), 7.01–6.94 (m, 2H), 4.65 (t,  $J$  = 7.4 Hz, 1H), 2.13–2.02 (m, 1H), 1.84–1.77 (m, 1H), 1.72–1.62 (m, 5H), 1.20–1.08 (m, 4H), 0.98–0.87 (m, 2H) ppm. <sup>13</sup>C NMR (100 MHz, CDCl<sub>3</sub>):  $\delta$  = 198.6, 165.8 (d,  $J_{C-F}$  = 253.6 Hz), 162.0 (d,  $J_{C-F}$  = 244.2 Hz), 135.6 (d,  $J_{C-F}$  = 3.2 Hz), 133.3 (d,  $J_{C-F}$  = 3.1 Hz), 131.4 (d,

$J_{\text{C-F}} = 9.2$  Hz), 129.9 (d,  $J_{\text{C-F}} = 7.9$  Hz), 116.1 (d,  $J_{\text{C-F}} = 8.7$  Hz), 115.8 (d,  $J_{\text{C-F}} = 9.2$  Hz), 49.8, 41.9, 35.4, 33.8, 33.4, 26.7, 26.3, 26.3 ppm. HRMS  $m/z$ : calcd for  $\text{C}_{21}\text{H}_{23}\text{F}_2\text{O}$   $[\text{M}+\text{H}]^+$  329.1717, found: 329.1716.

**1,2-bis(4-chlorophenyl)-3-cyclohexylpropan-1-one (5ca):** Yield = 84% (93 mg). Colorless oil. IR (KBr)  $\nu = 2920, 2849, 1681, 1588, 1488, 1210, 1091, 1013, 812, 744$   $\text{cm}^{-1}$ .  $^1\text{H}$  NMR (400MHz,  $\text{CDCl}_3$ ):  $\delta = 7.91\text{--}7.85$  (m, 2H), 7.40–7.35 (m, 2H), 7.28–7.19 (m, 4H), 4.62 (t,  $J = 7.3$  Hz, 1H), 2.11–2.01 (m, 1H), 1.83–1.75 (m, 1H), 1.72–1.60 (m, 5H), 1.21–1.08 (m, 4H), 0.99–0.86 (m, 2H) ppm.  $^{13}\text{C}$  NMR (100 MHz,  $\text{CDCl}_3$ ):  $\delta = 198.7, 139.7, 138.3, 135.1, 133.1, 130.2, 129.7, 129.3, 129.1, 77.6, 77.2, 76.9, 50.0, 41.7, 35.4, 33.8, 33.3, 26.6, 26.3, 26.3$  ppm. HRMS  $m/z$ : calcd for  $\text{C}_{21}\text{H}_{23}\text{Cl}_2\text{O}$   $[\text{M}+\text{H}]^+$  361.1126, found: 361.1116.

**1,2-bis(4-bromophenyl)-3-cyclohexylpropan-1-one (5da):** Yield = 88% (118 mg). Colorless oil. IR (KBr)  $\nu = 2919, 2849, 1680, 1584, 1485, 1395, 1172, 1070, 1009, 937, 784, 734$   $\text{cm}^{-1}$ .  $^1\text{H}$  NMR (400MHz,  $\text{CDCl}_3$ ):  $\delta = 7.82\text{--}7.77$  (m, 2H), 7.57–7.51 (m, 2H), 7.44–7.38 (m, 2H), 7.18–7.13 (m, 2H), 4.60 (t,  $J = 7.3$  Hz, 1H), 2.09–1.99 (m, 1H), 1.83–1.75 (m, 1H), 1.71–1.59 (m, 5H), 1.20–1.06 (m, 4H), 0.99–0.84 (m, 2H) ppm.  $^{13}\text{C}$  NMR (100 MHz,  $\text{CDCl}_3$ ):  $\delta = 198.8, 138.8, 135.5, 132.3, 132.1, 130.3, 130.1, 128.4, 121.3, 50.1, 41.6, 35.4, 33.8, 33.3, 26.6, 26.3, 26.3$  ppm. HRMS  $m/z$ : calcd for  $\text{C}_{21}\text{H}_{23}\text{Br}^{79}\text{Br}^{81}\text{O}$   $[\text{M}+\text{H}]^+$  451.0095, found: 451.0093.

**3-cyclohexyl-1,2-dip-tolylpropan-1-one (5ea):** Yield = 83% (85 mg). Colorless oil. IR (KBr)  $\nu = 2919, 2849, 1676, 1606, 1447, 1258, 1175, 936, 791, 760$   $\text{cm}^{-1}$ .  $^1\text{H}$  NMR (400MHz,  $\text{CDCl}_3$ ):  $\delta = 7.88$  (d,  $J = 8.1$  Hz, 2H), 7.18 (d,  $J = 7.9$  Hz, 4H), 7.08 (d,  $J = 7.9$  Hz, 2H), 4.66 (t,  $J = 7.3$  Hz, 1H), 2.34 (s, 3H), 2.27 (s, 3H), 2.13–2.03 (m, 1H), 1.85–1.78 (m, 1H), 1.70–1.61 (m, 5H), 1.20–1.08 (m, 4H), 0.98–0.86 (m, 2H) ppm.  $^{13}\text{C}$  NMR (100 MHz,  $\text{CDCl}_3$ ):  $\delta = 200.0, 143.7, 137.4, 136.6, 134.6, 129.7, 129.4, 129.0, 128.2, 50.1, 41.8, 35.5, 33.8, 33.5, 26.7, 26.4, 26.3, 21.8, 21.2$  ppm. HRMS  $m/z$ : calcd for  $\text{C}_{23}\text{H}_{29}\text{O}$   $[\text{M}+\text{H}]^+$  321.2218, found: 321.2220.

**3-cyclohexyl-1,2-bis(4-methoxyphenyl)propan-1-one (5fa):** Yield = 75% (103 mg). Colorless oil. IR (KBr)  $\nu = 2920, 2847, 1670, 1598, 1508, 1248, 1165, 1030, 828, 712$   $\text{cm}^{-1}$ .  $^1\text{H}$  NMR (400MHz,  $\text{CDCl}_3$ ):  $\delta = 7.98\text{--}7.91$  (m, 2H), 7.25–7.19 (m, 2H), 6.89–6.82 (m, 4H), 4.63 (t,  $J = 7.2$  Hz, 1H), 3.82 (s, 3H), 3.76 (s, 3H), 2.46–2.35 (m, 2H), 2.30–2.19 (m, 1H), 2.19–2.08 (m, 1H) ppm.  $^{13}\text{C}$  NMR (100 MHz,  $\text{CDCl}_3$ ):  $\delta = 197.1, 163.8, 159.2, 131.4, 130.1, 129.3, 129.2, 119.7, 115.0, 114.0, 55.7, 55.5, 50.9, 29.2, 15.4$  ppm. HRMS  $m/z$ : calcd for  $\text{C}_{23}\text{H}_{29}\text{O}_3$   $[\text{M}+\text{H}]^+$  353.2117, found: 353.2107.

**3-cyclohexyl-1,2-bis(3-(trifluoromethyl)phenyl)propan-1-one (5ga):** Yield = 87% (111 mg). Colorless oil. IR (KBr)  $\nu = 2924, 2853, 1688, 1449, 1326, 1164, 1122, 1072, 803, 702$   $\text{cm}^{-1}$ .  $^1\text{H}$  NMR (400MHz,  $\text{CDCl}_3$ ):  $\delta = 8.23$  (s, 1H), 8.13 (d,  $J = 7.9$  Hz, 1H), 7.77 (d,  $J = 7.8$  Hz, 1H), 7.57 (t,  $J = 7.8$  Hz, 2H), 7.53–7.47 (m, 2H), 7.47–7.41 (m, 1H), 4.78 (t,  $J = 7.3$  Hz, 1H), 2.19–2.10 (m, 1H), 1.86–1.78 (m, 1H), 1.77–1.62 (m, 5H), 1.23–1.10 (m, 4H), 1.01–0.91 (m, 2H) ppm.  $^{13}\text{C}$  NMR (100 MHz,  $\text{CDCl}_3$ ):  $\delta = 198.3, 140.5, 137.2, 131.8$  (d,  $J_{\text{C-F}} = 0.5$  Hz), 131.8 (d,  $J_{\text{C-F}} = 1.0$  Hz), 131.7, 131.4 (d,  $J_{\text{C-F}} = 2.7$  Hz), 131.1 (d,  $J_{\text{C-F}} = 1.2$  Hz), 129.8 (d,  $J_{\text{C-F}} = 3.6$  Hz), 129.7 (d,  $J_{\text{C-F}} = 8.1$  Hz), 125.6 (m), 125.2 (m), 124.4 (m), 122.6 (d,  $J_{\text{C-F}} = 34.2$  Hz), 50.7, 41.9, 35.5, 33.7, 33.4, 26.6, 26.3, 26.2 ppm. HRMS  $m/z$ : calcd for  $\text{C}_{23}\text{H}_{23}\text{F}_6\text{O}$   $[\text{M}+\text{H}]^+$  429.1653, found: 429.1652.

**1-(4-(benzyloxy)phenyl)-3-cyclohexyl-2-phenylpropan-1-one (5ha)** and **2-(4-(benzyloxy)phenyl)-3-cyclohexyl-1-phenylpropan-1-one (5ha')**: Yield = 59% (7.6:1, 71 mg). White solid (mixture). IR (KBr)  $\nu = 2920, 2850, 1665, 1600, 1452, 1251, 1172, 1020, 834, 743, 697$   $\text{cm}^{-1}$ . The  $^1\text{H}$  NMR spectrum of the isolated product showed a 7.6:1 mixture of **5ha** and its isomer **5ha'**.  $^1\text{H}$  NMR (400MHz,  $\text{CDCl}_3$ ):  $\delta = 8.00\text{--}7.94$  (m, 2H), 7.40–7.31 (m, 5H), 7.29 (d,  $J = 1.9$  Hz, 2H), 7.26 (d,  $J = 8.4$  Hz, 2H), 7.21–7.15 (m, 1H), 6.97–6.88 (m, 2H), 5.05 (s, 1.7H), 4.99 (s, 0.3H), 4.67 (t,  $J = 7.3$  Hz, 1H), 2.15–2.05 (m, 1H), 1.86–1.62 (m, 1H),

1.21–1.10 (m, 4H), 0.98–0.87 (m, 2H) ppm.  $^{13}\text{C}$  NMR (100 MHz,  $\text{CDCl}_3$ ) major product **5ha**:  $\delta$  = 198.8, 162.6, 140.6, 136.4, 131.1, 130.3, 129.0, 128.9, 128.4, 127.7, 127.0, 114.7, 70.3, 50.3, 42.0, 35.5, 33.8, 33.5, 26.7, 26.4, 26.3 ppm. HRMS  $m/z$ : calcd for  $\text{C}_{28}\text{H}_{31}\text{O}_2$   $[\text{M}+\text{H}]^+$  399.2324, found: 399.2322.

**3-cyclohexyl-1-(3,4-dimethylphenyl)-2-phenylpropan-1-one (5ia)** and  
**3-cyclohexyl-2-(3,4-dimethylphenyl)-1-phenylpropan-1-one (5ia')**: Yield = 80% (2.3:1, 76 mg). Colorless oil. IR (KBr)  $\nu$  = 2919, 2849, 1676, 1604, 1405, 1242, 1122, 735, 699  $\text{cm}^{-1}$ . The  $^1\text{H}$  NMR spectrum of the isolated product showed a 2.3:1 mixture of **5ia** and its isomer **5ia'**.  $^1\text{H}$  NMR (400MHz,  $\text{CDCl}_3$ ):  $\delta$  = 8.00–7.95 (m, 0.6H), 7.77–7.75 (s, 0.6H), 7.74–7.69 (m, 0.7H), 7.49–7.44 (m, 0.3H), 7.41–7.35 (m, 0.6H), 7.32–7.24 (m, 3H), 7.20–7.11 (m, 1.4H), 7.05–7.02 (m, 0.8H), 4.70 (t,  $J$  = 7.2 Hz, 0.7H), 4.65 (t,  $J$  = 7.2 Hz, 0.3H), 2.26 (s, 2H), 2.25 (s, 2H), 2.20 (s, 1H), 2.18 (s, 1H), 2.16–2.06 (m, 1H), 1.85–1.77 (m, 1H), 1.72–1.59 (m, 5H), 1.25–1.09 (m, 4H), 0.97–0.86 (m, 2H) ppm.  $^{13}\text{C}$  NMR (100 MHz,  $\text{CDCl}_3$ ) **5ia** and its isomer **5ia'**:  $\delta$  = 200.4, 200.1, 142.6, 140.5, 137.6, 137.2, 137.1, 135.3, 135.0, 132.9, 130.3, 130.0, 129.9, 129.4, 129.0, 128.9, 128.7, 128.4, 126.9, 126.6, 125.9, 50.4, 50.3, 42.0, 41.9, 35.6, 35.5, 33.8, 33.7, 33.5, 33.5, 26.7, 26.4, 26.3, 20.1, 20.0, 19.6 ppm. HRMS  $m/z$ : calcd for  $\text{C}_{23}\text{H}_{29}\text{O}$   $[\text{M}+\text{H}]^+$  321.2218, found: 321.2213.

**2-(4-bromophenyl)-3-cyclohexyl-1-phenylpropan-1-one (5ja)** and  
**1-(4-bromophenyl)-3-cyclohexyl-2-phenylpropan-1-one (5ja')**: Yield = 87% (3.2:1, 120 mg). White solid (mixture). IR (KBr)  $\nu$  = 2919, 2849, 1676, 1582, 1446, 1070, 1010, 973, 823, 718, 685  $\text{cm}^{-1}$ . The  $^1\text{H}$  NMR spectrum of the isolated product showed a 3.2:1 mixture of **5ja** and its isomer **5ja'**.  $^1\text{H}$  NMR (400MHz,  $\text{CDCl}_3$ ):  $\delta$  = 7.98–7.91 (m, 1.5H), 7.85–7.80 (m, 0.5H), 7.53–7.48 (m, 1.3H), 7.44–7.38 (m, 3H), 7.30–7.25 (m, 1H), 7.22–7.16 (m, 1.7H), 4.69 (t,  $J$  = 7.4 Hz, 0.76H), 4.63 (t,  $J$  = 7.3 Hz, 0.24H), 2.14–2.02 (m, 1H), 1.81 (d,  $J$  = 12.8 Hz, 1H), 1.72–1.60 (m, 5H), 1.22–1.08 (m, 4H), 0.98–0.88 (m, 2H) ppm.  $^{13}\text{C}$  NMR (100 MHz,  $\text{CDCl}_3$ ) major product **5ja**:  $\delta$  = 199.9, 139.1, 136.8, 133.2, 132.1, 130.2, 128.8, 128.8, 121.1, 50.0, 41.7, 35.4, 33.8, 33.3, 26.6, 26.3, 26.3 ppm. HRMS  $m/z$ : calcd for  $\text{C}_{21}\text{H}_{24}\text{BrO}$   $[\text{M}+\text{H}]^+$  371.1011, found: 371.1003.

**3-cyclohexyl-1-phenyl-2-(3-(trifluoromethyl)phenyl)propan-1-one (5ka)** and  
**3-cyclohexyl-2-phenyl-1-(3-(trifluoromethyl)phenyl)propan-1-one (5ka')**: Yield = 90% (4:1, 104 mg). Colorless oil. IR (KBr)  $\nu$  = 2922, 2852, 1682, 1447, 1326, 1163, 1096, 700, 686  $\text{cm}^{-1}$ . The  $^1\text{H}$  NMR spectrum of the isolated product showed a 4:1 mixture of **5ka** and its isomer **5ka'**.  $^1\text{H}$  NMR (400MHz,  $\text{CDCl}_3$ ):  $\delta$  = 8.25–7.94 (m, 2H), 7.74–7.50 (m, 3H), 7.48–7.38 (m, 3H), 7.31–7.18 (m, 1H), 4.81 (t,  $J$  = 7.3 Hz, 0.8H), 4.68 (t,  $J$  = 7.3 Hz, 0.2H), 2.20–2.07 (m, 1H), 1.86–1.62 (m, 6H), 1.21–1.08 (m, 4H), 1.00–0.88 (m, 2H) ppm.  $^{13}\text{C}$  NMR (100 MHz,  $\text{CDCl}_3$ ) major product **3ka**:  $\delta$  = 199.7, 141.1, 136.8, 133.4, 131.8 (d,  $J_{\text{C-F}}$  = 0.8 Hz), 129.5, 129.3, 128.9, 128.8, 128.4, 125.2 (m), 124.1 (m), 50.3, 42.1, 35.6, 33.7, 33.4, 26.6, 26.3, 26.3 ppm. HRMS  $m/z$ : calcd for  $\text{C}_{22}\text{H}_{24}\text{F}_3\text{O}$   $[\text{M}+\text{H}]^+$  361.1779, found: 361.1765.

**3-cyclohexyl-1-phenyl-2-(pyridin-3-yl)propan-1-one (5la)**: Yield = 52% (46 mg). White solid (M.p. 92.4–93.7  $^{\circ}\text{C}$ ). IR (KBr)  $\nu$  = 2919, 2850, 1670, 1446, 1232, 1057, 1027, 742, 707, 692  $\text{cm}^{-1}$ .  $^1\text{H}$  NMR (400MHz,  $\text{CDCl}_3$ ):  $\delta$  = 8.59 (d,  $J$  = 1.9 Hz, 1H), 8.46 (dd,  $J$  = 4.7, 1.2 Hz, 1H), 7.97 (d,  $J$  = 7.3 Hz, 2H), 7.70–7.64 (m, 1H), 7.57–7.50 (m, 1H), 7.47–7.40 (m, 2H), 7.26–7.20 (m, 1H), 4.78 (t,  $J$  = 7.4 Hz, 1H), 2.16–2.05 (m, 1H), 1.83 (d,  $J$  = 12.6 Hz, 1H), 1.76–1.60 (m, 5H), 1.22–1.08 (m, 4H), 1.00–0.90 (m, 2H) ppm.  $^{13}\text{C}$  NMR (100 MHz,  $\text{CDCl}_3$ ):  $\delta$  = 199.6, 150.1, 148.5, 136.6, 135.7, 135.7, 133.5, 128.9, 128.7, 124.0, 47.7, 41.76, 35.4, 33.8, 33.2, 26.6, 26.3, 26.2 ppm. HRMS  $m/z$ : calcd for  $\text{C}_{20}\text{H}_{24}\text{NO}$   $[\text{M}+\text{H}]^+$  294.1858, found: 294.2863.

**3-cyclohexyl-1-(2-fluorophenyl)-2-phenylpropan-1-one (5ma)** and



**3-cyclohexyl-2-(2-fluorophenyl)-1-phenylpropan-1-one (5ma')**: Yield = 86% (2.5:1, 80 mg). Colorless oil. IR (KBr)  $\nu$  = 2921, 2850, 1682, 1608, 1448, 1273, 1212, 939, 757, 696  $\text{cm}^{-1}$ . The  $^1\text{H}$  NMR spectrum of the isolated product showed a 2.5:1 mixture of **5ma** and its isomer **5ma'**.  $^1\text{H}$  NMR (400MHz,  $\text{CDCl}_3$ ):  $\delta$  = 8.01–7.97 (m, 0.6H), 7.71–7.65 (m, 0.7H), 7.51–7.46 (m, 0.4H), 7.43–7.36 (m, 1.3H), 7.27–7.23 (m, 2.9H), 7.21–7.15 (m, 1.1H), 7.13–7.09 (m, 0.8H), 7.06–7.00 (m, 1.2H), 5.13 (t,  $J$  = 7.3 Hz, 0.3H), 4.64 (t,  $J$  = 7.3 Hz, 0.7H), 2.15–2.06 (m, 1H), 1.86–1.80 (m, 1H), 1.74–1.60 (m, 5H), 1.20–1.08 (m, 4H), 0.98–0.87 (m, 2H) ppm.  $^{13}\text{C}$  NMR (100 MHz,  $\text{CDCl}_3$ ) major product **5ma**:  $\delta$  = 199.74, 199.70, 161.1 (d,  $J_{\text{C-F}}$  = 252.1Hz), 160.2 (d,  $J_{\text{C-F}}$  = 242.9 Hz), 139.2, 136.7, 134.1 (d,  $J_{\text{C-F}}$  = 8.9 Hz), 133.2, 131.2 (d,  $J_{\text{C-F}}$  = 2.8Hz), 129.3 (d,  $J_{\text{C-F}}$  = 3.7Hz), 128.8, 128.7 (d,  $J_{\text{C-F}}$  = 0.5Hz), 127.1, 126.6 (d,  $J_{\text{C-F}}$  = 12.8Hz), 124.8 (d,  $J_{\text{C-F}}$  = 3.6Hz), 124.5 (d,  $J_{\text{C-F}}$  = 3.4 Hz), 116.7 (d,  $J_{\text{C-F}}$  = 23.7 Hz), 115.7 (d,  $J_{\text{C-F}}$  = 22.8 Hz), 55.0, 54.9, 41.4, 40.9, 35.6, 35.4, 33.8, 33.7, 33.4, 33.2, 26.7, 26.7, 26.4, 26.3 ppm. HRMS  $m/z$ : calcd for  $\text{C}_{21}\text{H}_{24}\text{FO}$   $[\text{M}+\text{H}]^+$  311.1811, found: 311.1806.

**1-(2-chlorophenyl)-2-(4-chlorophenyl)-3-cyclohexylpropan-1-one (5na)**: Yield = 90% (108 mg). Colorless oil. IR (KBr)  $\nu$  = 2921, 2850, 1698, 1589, 1489, 1432, 1263, 1090, 1014, 810, 742  $\text{cm}^{-1}$ .  $^1\text{H}$  NMR (400MHz,  $\text{CDCl}_3$ ):  $\delta$  = 7.37–7.33 (m, 1H), 7.32–7.27 (m, 1H), 7.27–7.22 (m, 2H), 7.20–7.12 (m, 3H), 7.11–7.06 (m, 1H), 4.52 (dd,  $J$  = 8.7, 6.3 Hz, 1H), 2.07–1.98 (m, 1H), 1.81–1.74 (m, 2H), 1.70–1.59 (m, 4H), 1.18–1.08 (m, 4H), 0.99–0.88 (m, 2H) ppm.  $^{13}\text{C}$  NMR (100 MHz,  $\text{CDCl}_3$ ):  $\delta$  = 203.7, 139.9, 136.9, 133.3, 131.5, 130.6, 130.5, 130.2, 129.1, 129.1, 126.9, 54.6, 40.2, 35.0, 34.1, 32.9, 26.7, 26.3, 26.2 ppm. HRMS  $m/z$ : calcd for  $\text{C}_{21}\text{H}_{23}\text{Cl}_2\text{O}$   $[\text{M}+\text{H}]^+$  361.1126, found: 361.1110.

**3-cyclopentyl-1,2-diphenylpropan-1-one (5ab)**: Yield = 52% (43 mg). Yield solid (M.p. 72.8–74.1  $^{\circ}\text{C}$ ). IR (KBr)  $\nu$  = 2950, 2903, 1667, 1491, 1446, 1271, 1200, 1029, 743, 694, 666  $\text{cm}^{-1}$ .  $^1\text{H}$  NMR (400MHz,  $\text{CDCl}_3$ ):  $\delta$  = 8.01–7.94 (m, 2H), 7.50–7.45 (m, 1H), 7.41–7.36 (m, 2H), 7.34–7.25 (m, 4H), 7.22–7.16 (m, 1H), 4.63 (t,  $J$  = 7.3 Hz, 1H), 2.23–2.15 (m, 1H), 1.93–1.79 (m, 2H), 1.71–1.64 (m, 2H), 1.61–1.53 (m, 2H), 1.50–1.41 (m, 2H), 1.19–1.09 (m, 2H) ppm.  $^{13}\text{C}$  NMR (100 MHz,  $\text{CDCl}_3$ ):  $\delta$  = 200.4, 140.0, 137.2, 133.0, 129.0, 128.8, 128.7, 128.5, 127.1, 52.8, 40.6, 38.0, 33.1, 32.8, 25.3, 25.3 ppm. HRMS  $m/z$ : calcd for  $\text{C}_{20}\text{H}_{23}\text{O}$   $[\text{M}+\text{H}]^+$  279.1749, found: 279.1748.

**3-cycloheptyl-1,2-diphenylpropan-1-one (5ac)**: Yield = 80% (74 mg). Colorless oil. IR (KBr)  $\nu$  = 2919, 2851, 1680, 1492, 1271, 1112, 755, 696  $\text{cm}^{-1}$ .  $^1\text{H}$  NMR (400MHz,  $\text{CDCl}_3$ ):  $\delta$  = 8.00–7.94 (m, 2H), 7.50–7.44 (m, 1H), 7.42–7.35 (m, 2H), 7.33–7.25 (m, 4H), 7.21–7.16 (m, 1H), 4.68 (t,  $J$  = 7.3 Hz, 1H), 2.18–2.09 (m, 1H), 2.02–1.89 (m, 1H), 1.82–1.73 (m, 2H), 1.59–1.39 (m, 9H), 1.27–1.20 (m, 2H) ppm.  $^{13}\text{C}$  NMR (100 MHz,  $\text{CDCl}_3$ ):  $\delta$  = 200.4, 140.1, 137.2, 133.0, 129.0, 128.8, 128.7, 128.5, 127.1, 51.3, 42.3, 36.8, 35.0, 34.5, 28.8, 28.7, 26.4, 26.3 ppm. HRMS  $m/z$ : calcd for  $\text{C}_{22}\text{H}_{27}\text{O}$   $[\text{M}+\text{H}]^+$  307.2062, found: 307.2061.

**3-cyclooctyl-1,2-diphenylpropan-1-one (5ad)**: Yield = 79% (78 mg). Colorless oil. IR (KBr)  $\nu$  = 2914, 2853, 1681, 1446, 1210, 1073, 756, 696  $\text{cm}^{-1}$ .  $^1\text{H}$  NMR (400MHz,  $\text{CDCl}_3$ ):  $\delta$  = 7.92–7.87 (m, 2H), 7.43–7.38 (m, 1H), 7.34–7.29 (m, 2H), 7.25–7.18 (m, 4H), 7.14–7.08 (m, 1H), 4.61 (t,  $J$  = 7.3 Hz, 1H), 2.10–2.01 (m, 1H), 1.85–1.75 (m, 1H), 1.57–1.30 (m, 15H) ppm.  $^{13}\text{C}$  NMR (100 MHz,  $\text{CDCl}_3$ ):  $\delta$  = 200.4, 140.1, 137.2, 133.0, 129.0, 128.8, 128.7, 128.5, 127.1, 51.3, 42.1, 34.9, 32.5, 32.1, 27.6, 27.5, 26.3, 25.4, 25.4 ppm. HRMS  $m/z$ : calcd for  $\text{C}_{23}\text{H}_{29}\text{O}$   $[\text{M}+\text{H}]^+$  321.2218, found: 321.2223.

**Product (5ae-1) and product (5ae'-2)**: Yield = 88% (**5ae-1**/**5ae'-2** = 5/1, 96 mg). White solid (mixture). IR (KBr)  $\nu$  = 2893, 2845, 1670, 1493, 1447, 1270, 1100, 959, 756, 694  $\text{cm}^{-1}$ .  $^1\text{H}$  NMR (400MHz,  $\text{CDCl}_3$ ) major product **5ae-1**:  $\delta$  = 7.95–7.91 (m, 2H), 7.44–7.39 (m, 1H), 7.35–7.31 (m, 2H), 7.23–7.17 (m, 4H), 7.11–7.05 (m, 1H),

4.72–4.67 (m, 1H), 2.49–2.41 (m, 1H), 1.83–1.46 (m, 14H), 1.34–1.27 (m, 2H) ppm.  $^{13}\text{C}$  NMR (100 MHz,  $\text{CDCl}_3$ ) major product **5ae-1**:  $\delta$  = 200.0, 141.5, 137.1, 133.0, 129.1, 128.9, 128.8, 128.3, 126.9, 48.6, 47.7, 43.0, 37.1, 33.3, 28.8 ppm. HRMS  $m/z$ : calcd for  $\text{C}_{25}\text{H}_{29}\text{O}$   $[\text{M}+\text{H}]^+$  345.2218, found: 345.2224.

**product (5af)**: Yield = 28% ( $2/3 = 8/3$ , 26 mg). Colorless oil. IR (KBr)  $\nu$  = 2956, 2926, 2870, 1680, 1447, 1205, 1175, 756, 696  $\text{cm}^{-1}$ . The  $^1\text{H}$  NMR spectrum of the isolated product showed a mixture.  $^1\text{H}$  NMR (400MHz,  $\text{CDCl}_3$ ):  $\delta$  = 7.94–7.85 (m, 2H), 7.43–7.37 (m, 1H), 7.35–7.28 (m, 2H), 7.26–7.18 (m, 4H), 7.14–7.09 (m, 1H), 4.69–4.43 (m, 1H), 2.26–2.17 (m, 0.4H), 2.11–2.02 (m, 0.4H), 1.85 (t,  $J$  = 7.0 Hz, 0.6H), 1.74–1.64 (m, 0.4H), 1.53–1.44 (m, 0.6H), 1.36–1.00 (m, 5.6H), 0.87–0.83 (m, 1H), 0.82–0.76 (m, 3H), 0.74–0.68 (m, 2H) ppm.  $^{13}\text{C}$  NMR (100 MHz,  $\text{CDCl}_3$ ):  $\delta$  = 200.5, 200.4, 200.2, 140.4, 140.2, 139.8, 137.3, 137.2, 137.2, 137.1, 133.0, 129.1, 129.0, 129.0, 128.8, 128.8, 128.8, 128.7, 128.7, 128.6, 128.5, 128.5, 128.4, 128.4, 127.1, 127.1, 51.3, 51.2, 51.2, 41.9, 41.1, 39.8, 39.5, 38.0, 37.7, 30.6, 30.3, 25.5, 25.4, 20.1, 20.0, 19.8, 14.6, 14.5, 10.7, 10.7 ppm. HRMS  $m/z$ : calcd for  $\text{C}_{20}\text{H}_{25}\text{O}$   $[\text{M}+\text{H}]^+$  281.1905, found: 281.1902.

**product (5ag)**: Yield = 76% ( $2/3 = 6/4$ , 70 mg). Colorless oil. IR (KBr)  $\nu$  = 2955, 2925, 1681, 1493, 1447, 1206, 1002, 756, 696  $\text{cm}^{-1}$ . The  $^1\text{H}$  NMR spectrum of the isolated product showed a mixture.  $^1\text{H}$  NMR (400MHz,  $\text{CDCl}_3$ ):  $\delta$  = 7.93–7.86 (m, 2H), 7.42–7.36 (m, 1H), 7.34–7.28 (m, 2H), 7.26–7.16 (m, 4H), 7.14–7.08 (m, 1H), 4.68–4.43 (m, 1H), 2.27–2.17 (m, 0.4H), 2.13–1.99 (m, 0.4H), 1.85 (t,  $J$  = 7.0 Hz, 0.6H), 1.74–1.62 (m, 0.5H), 1.52–1.44 (m, 0.5H), 1.33–1.03 (m, 7.6H), 0.87–0.68 (m, 6H) ppm.  $^{13}\text{C}$  NMR (100 MHz,  $\text{CDCl}_3$ ):  $\delta$  = 200.4, 200.4, 200.3, 200.2, 140.4, 140.2, 140.1, 139.8, 137.3, 137.3, 137.2, 137.1, 133.0, 133.0, 129.1, 129.0, 129.0, 129.0, 128.8, 128.8, 128.7, 128.5, 128.5, 128.4, 128.4, 127.1, 127.1, 51.3, 51.3, 51.2, 51.2, 42.0, 41.1, 38.2, 38.0, 37.2, 36.9, 36.4, 36.3, 35.6, 35.6, 30.9, 30.5, 29.2, 29.1, 26.0, 23.2, 23.1, 20.1, 19.9, 19.6, 14.7, 14.6, 14.4, 14.3, 10.6, 10.6 ppm. HRMS  $m/z$ : calcd for  $\text{C}_{21}\text{H}_{27}\text{O}$   $[\text{M}+\text{H}]^+$  295.2062, found: 295.2062.

**5,6-diphenyl-3,4-dihydropyridin-2(1H)-one (6)**: Yield = 50% (63 mg). White solid (M.p. 224.7–226.3  $^{\circ}\text{C}$ ). IR (KBr)  $\nu$  = 3195, 3080, 1665, 1638, 1384, 1291, 1215, 824, 759, 653  $\text{cm}^{-1}$ .  $^1\text{H}$  NMR (400MHz,  $\text{CDCl}_3$ ):  $\delta$  = 7.26–7.21 (m, 3H), 7.18–7.13 (m, 3H), 7.14–7.09 (m, 2H), 7.02–6.98 (m, 2H), 6.95 (s, 1H), 2.91–2.84 (m, 2H), 2.74–2.67 (m, 2H) ppm.  $^{13}\text{C}$  NMR (100 MHz,  $\text{CDCl}_3$ ):  $\delta$  = 171.2, 140.1, 135.8, 133.0, 129.2, 128.8, 128.7, 128.7, 128.2, 126.4, 115.4, 77.6, 77.2, 76.9, 31.0, 28.1 ppm. HRMS  $m/z$ : calcd for  $\text{C}_{17}\text{H}_{16}\text{NO}$   $[\text{M}+\text{H}]^+$  250.1232, found: 250.1238.

**2,3-diphenylpiperidine (7)**: Yield = 79% (78 mg). Yellow oil. IR (KBr)  $\nu$  = 3289, 3026, 2935, 2866, 1678, 1451, 1043, 758, 699  $\text{cm}^{-1}$ .  $^1\text{H}$  NMR (400MHz,  $\text{CDCl}_3$ ):  $\delta$  = 7.35–7.20 (m, 8H), 7.19–7.12 (m, 2H), 4.71 (d,  $J$  = 7.8 Hz, 1H), 2.88–2.77 (m, 1H), 2.54–2.38 (m, 2H), 2.16 (s, 1H), 1.59–1.39 (m, 2H), 1.20–1.11 (m, 2H) ppm.  $^{13}\text{C}$  NMR (100 MHz,  $\text{CDCl}_3$ ):  $\delta$  = 142.8, 141.2, 129.0, 128.7, 128.4, 127.9, 127.1, 127.1, 78.5, 77.6, 77.2, 76.9, 54.1, 41.5, 30.4, 29.0 ppm. HRMS  $m/z$ : calcd for  $\text{C}_{17}\text{H}_{20}\text{N}$   $[\text{M}+\text{H}]^+$  238.1596, found: 238.1594.

The  $^1\text{H}$ ,  $^{13}\text{C}$  spectra of compounds:

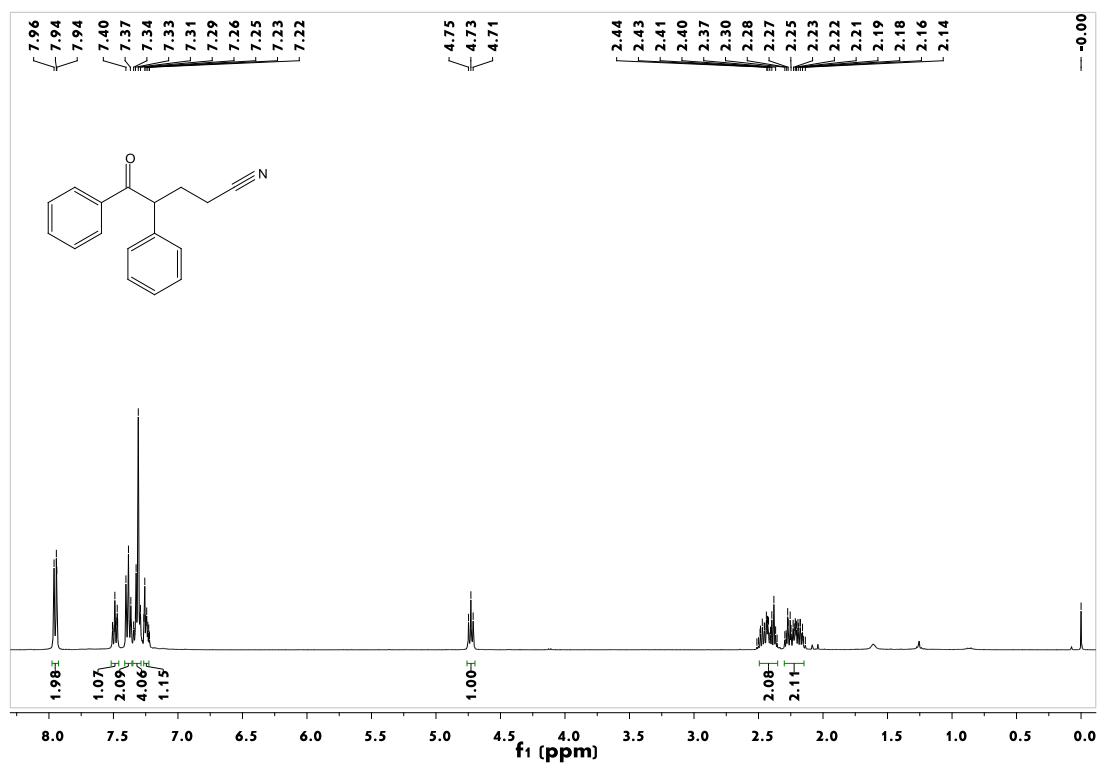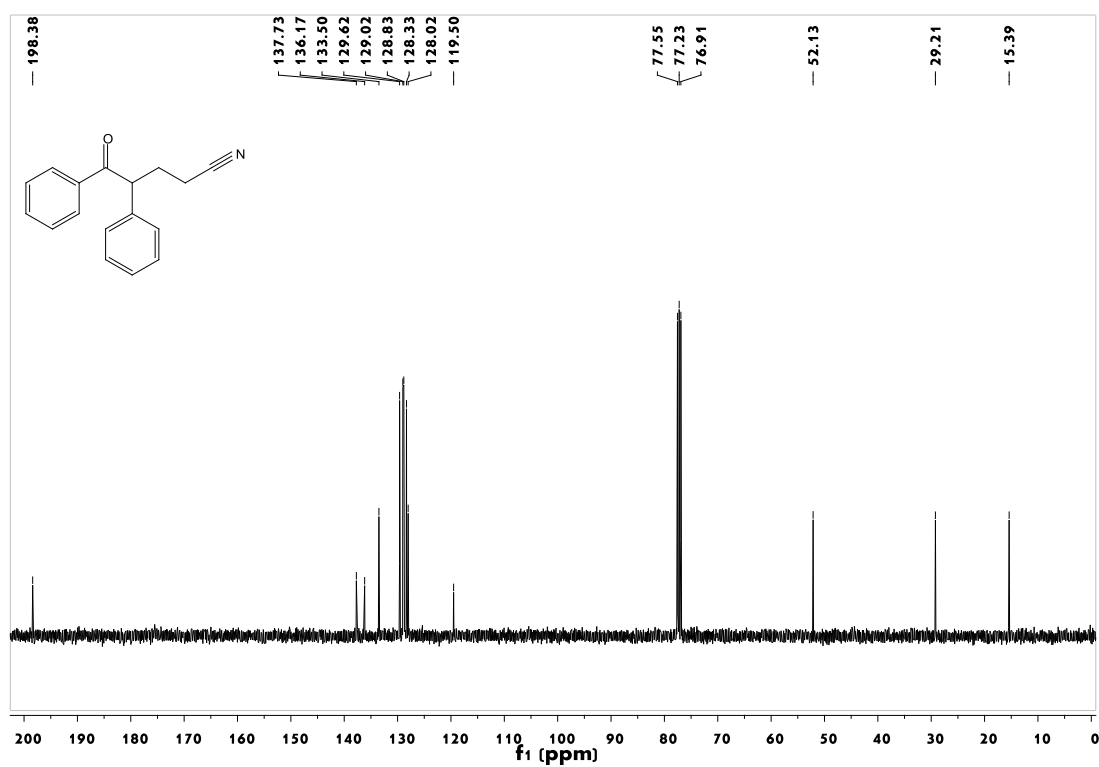

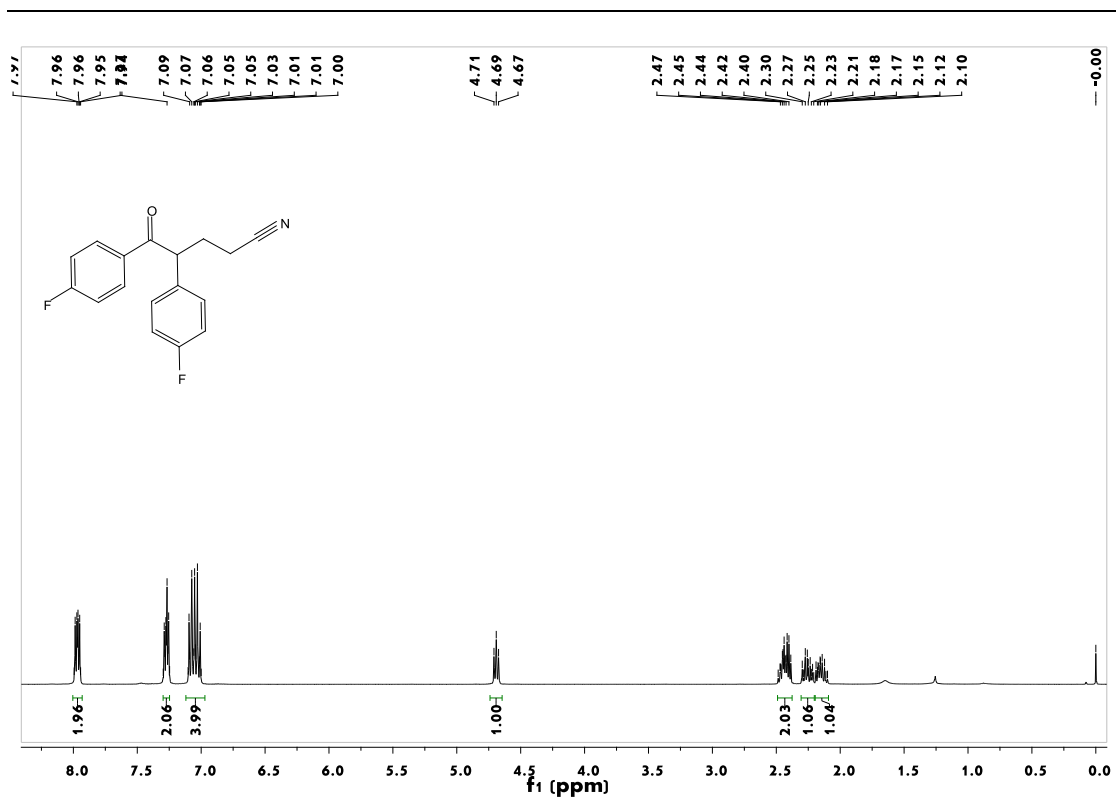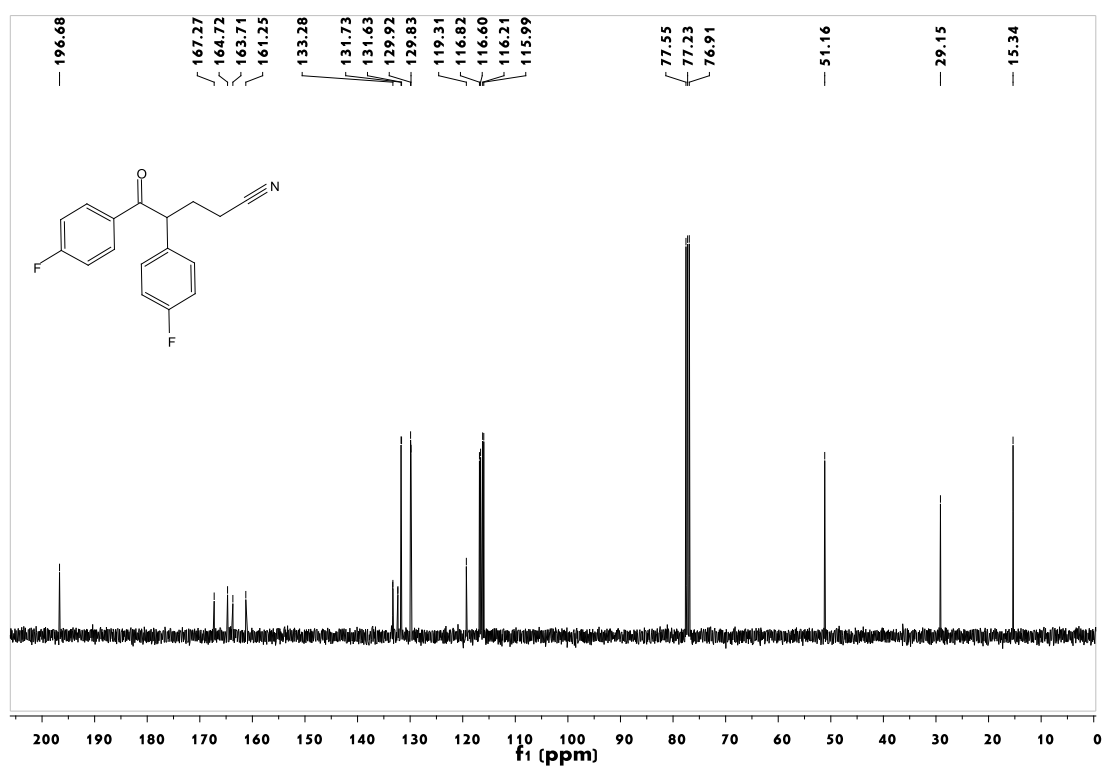

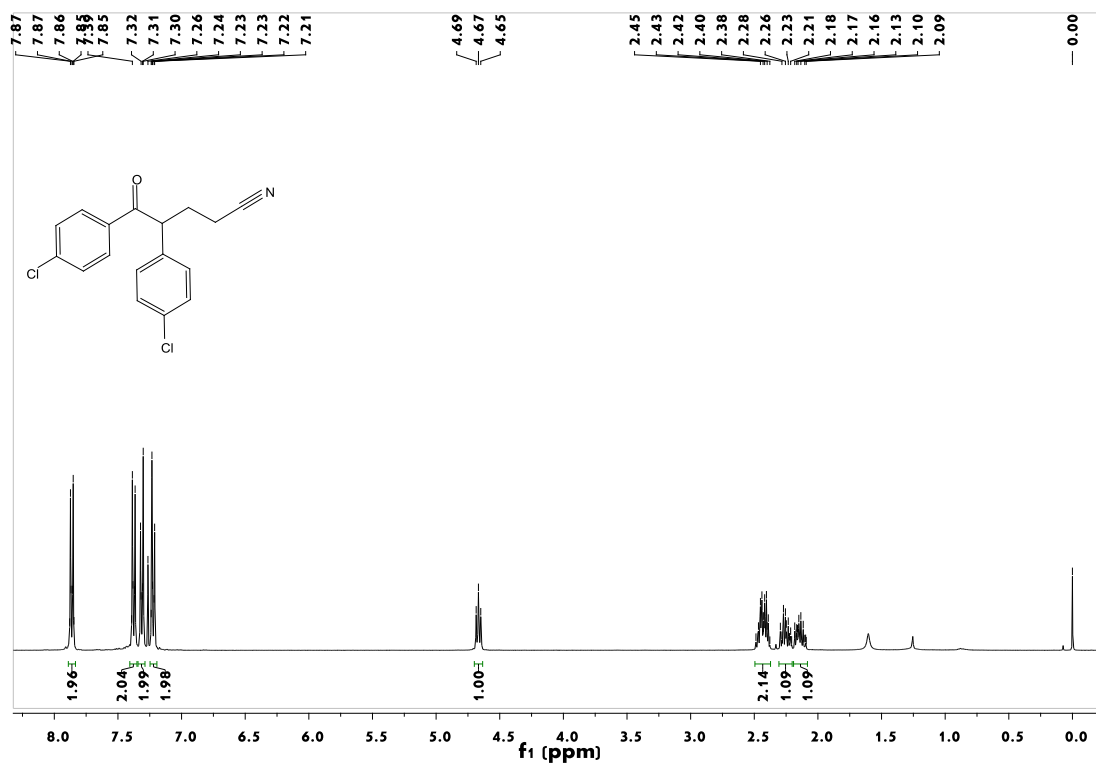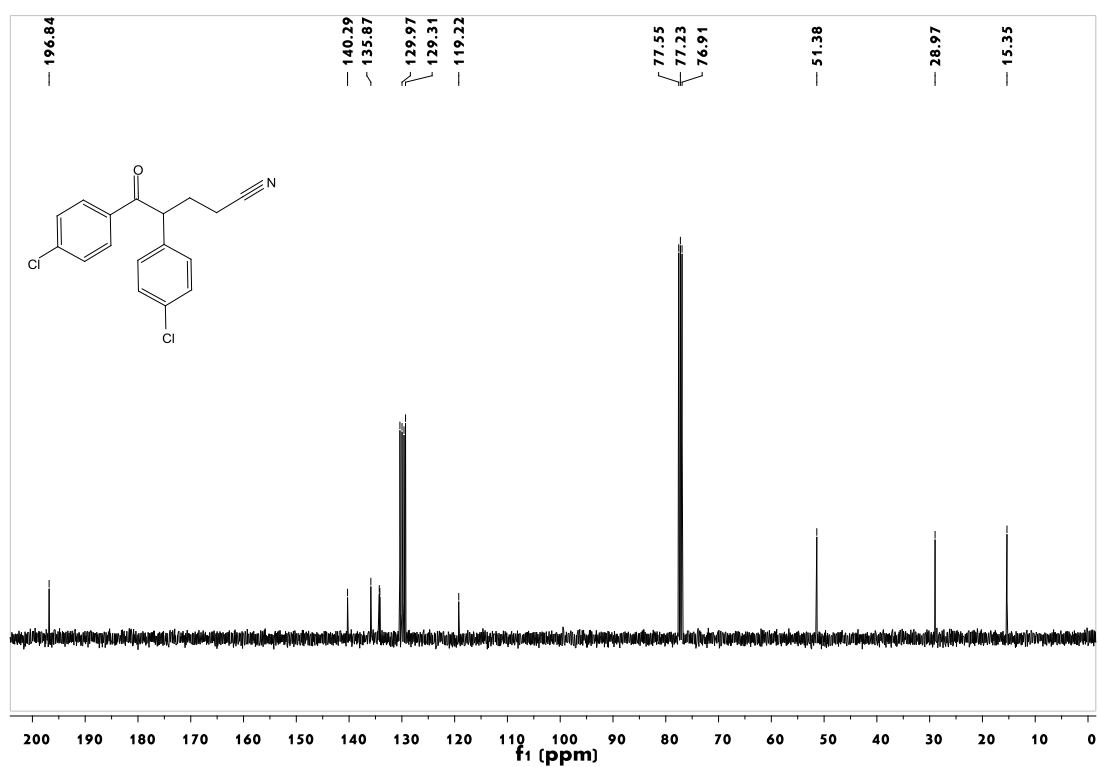

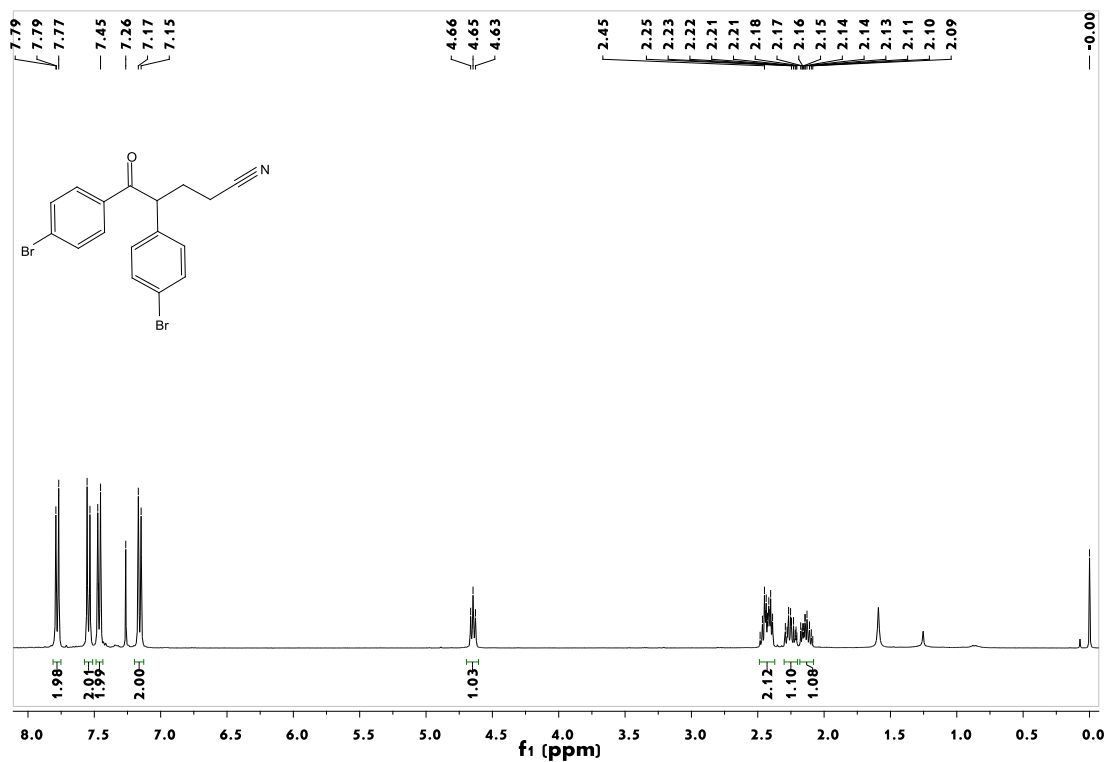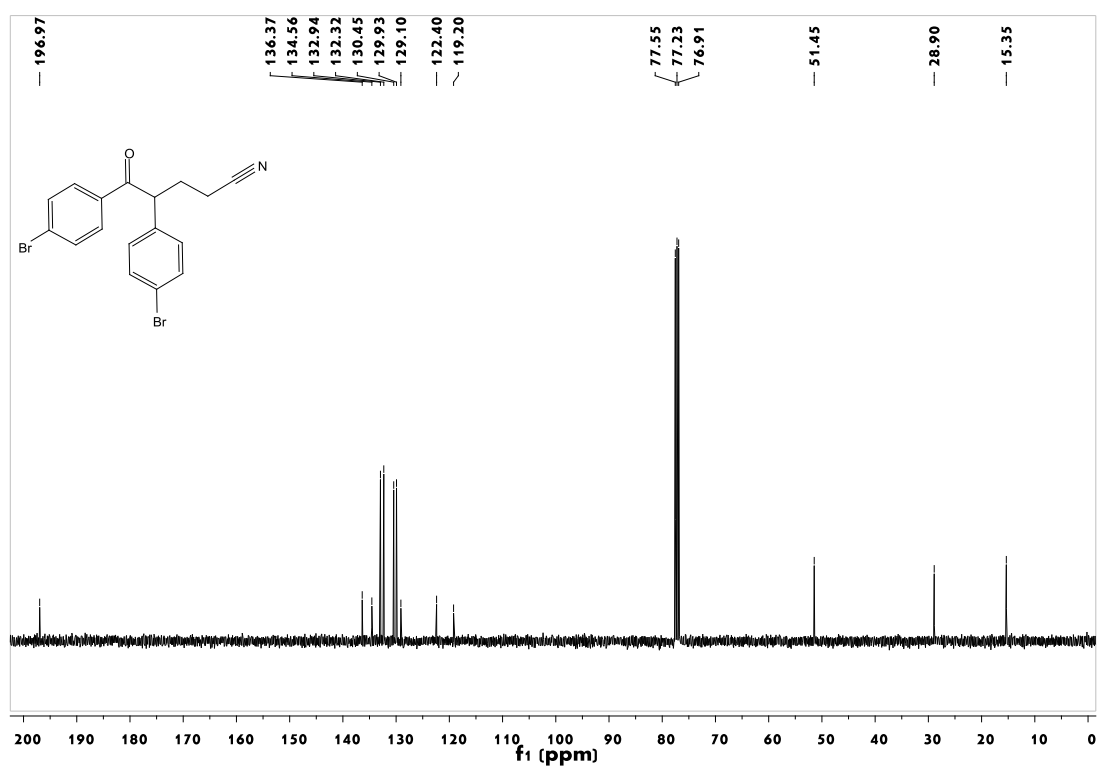

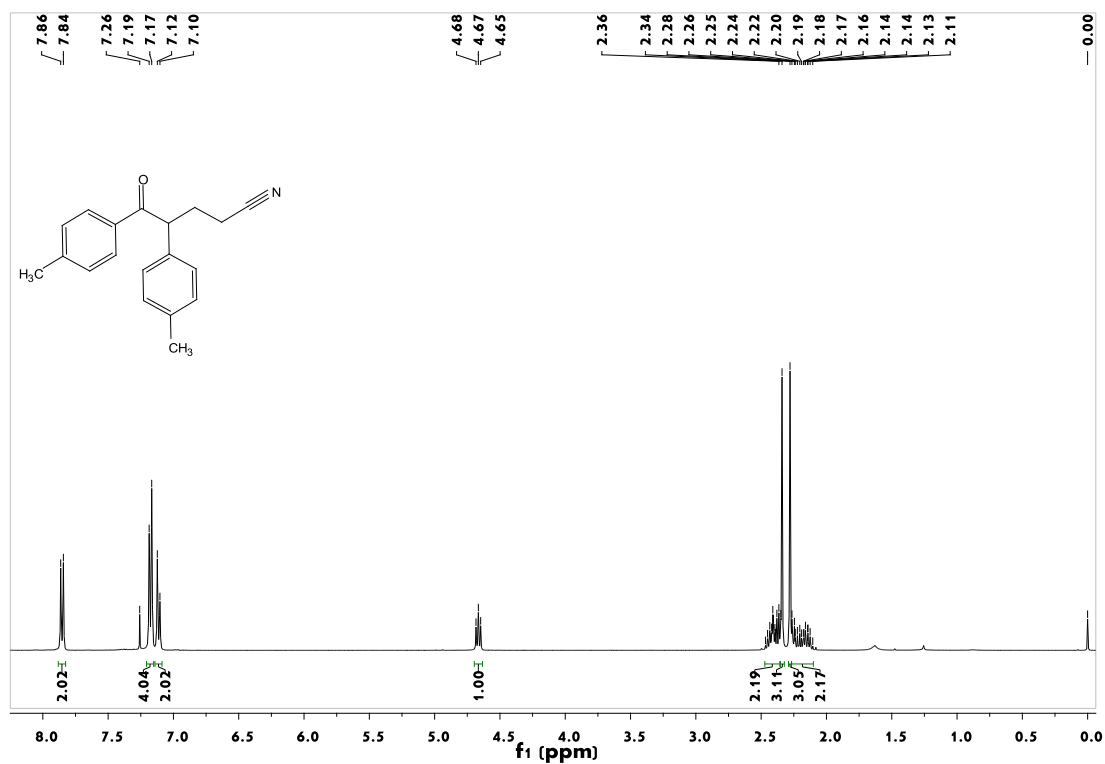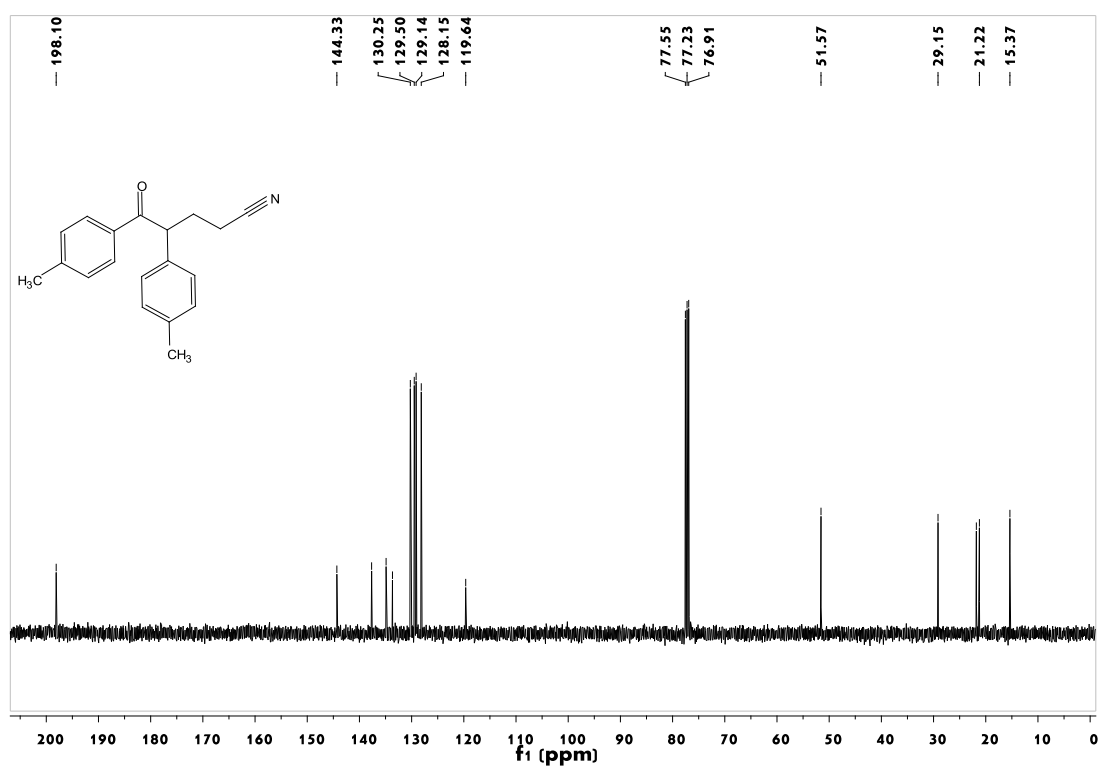

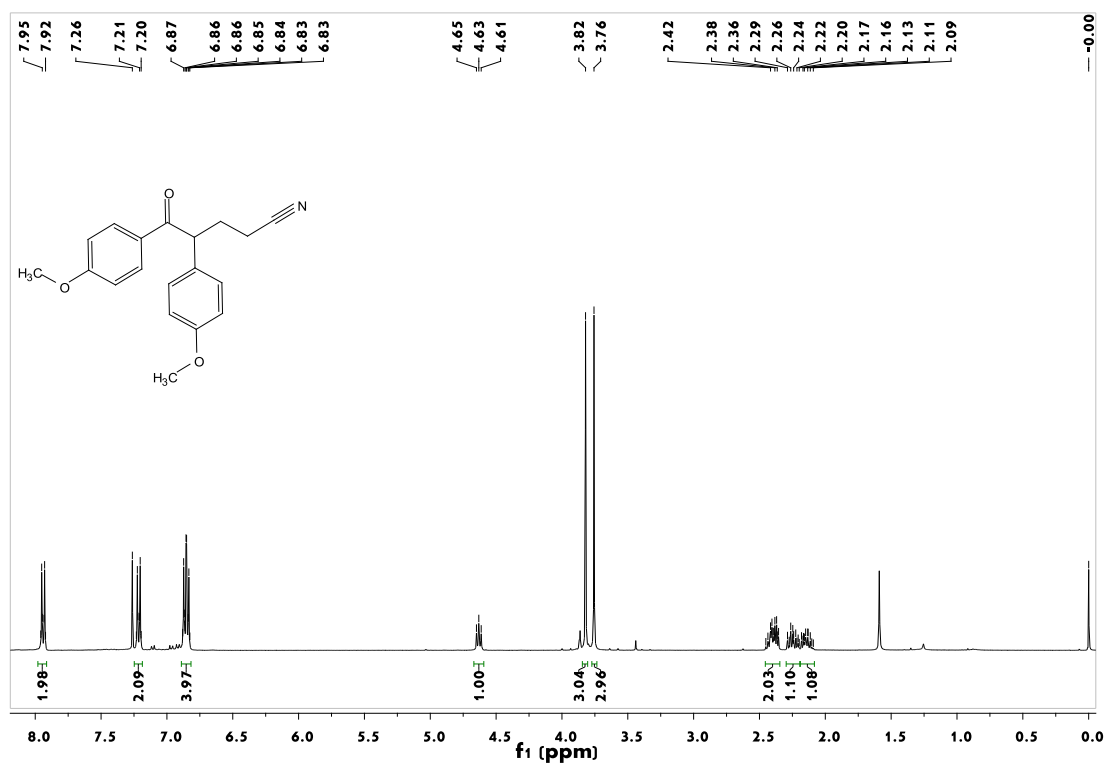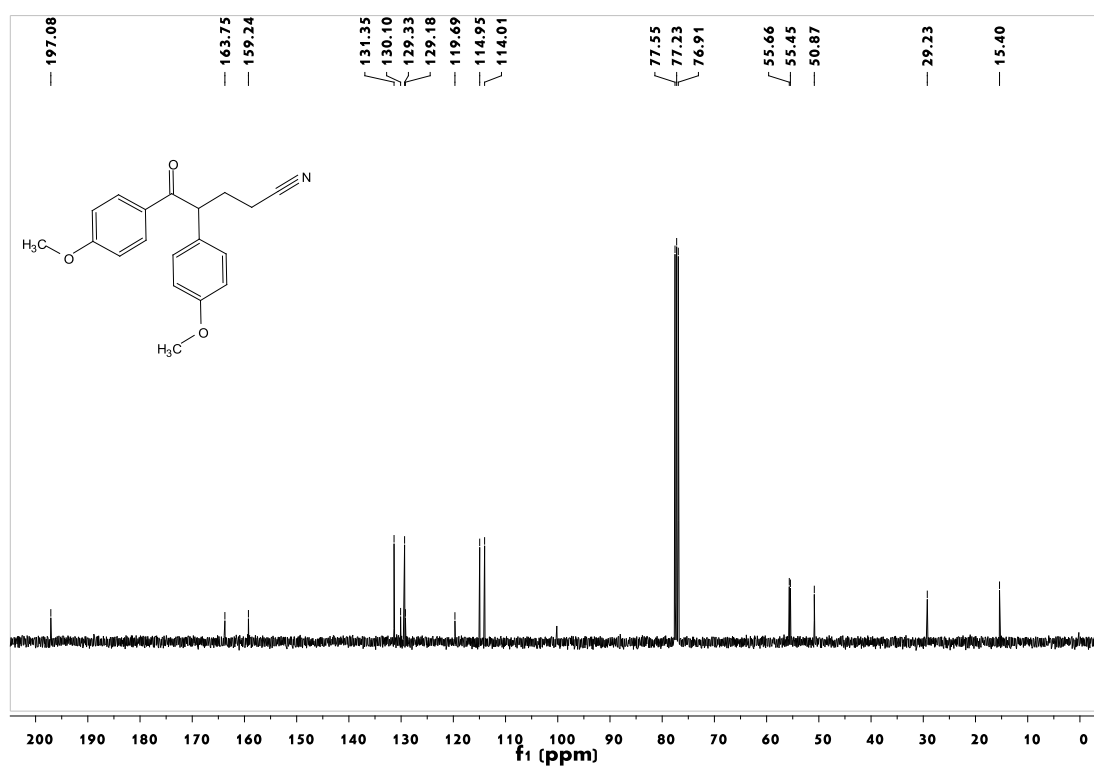



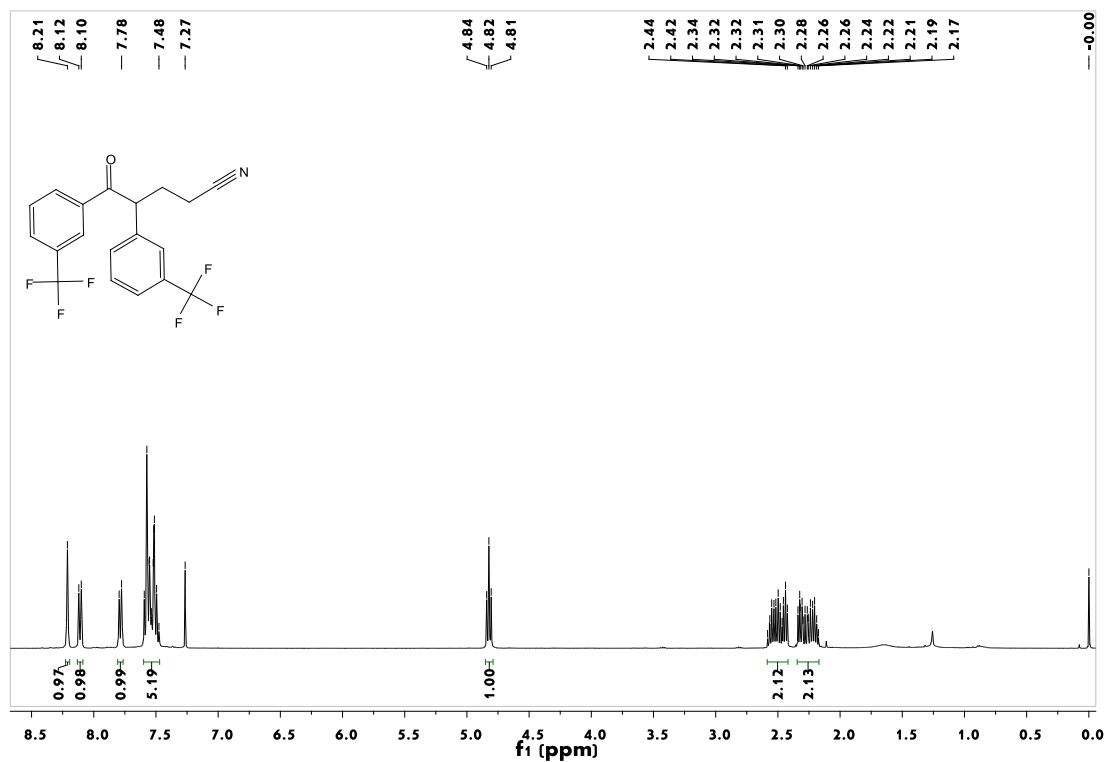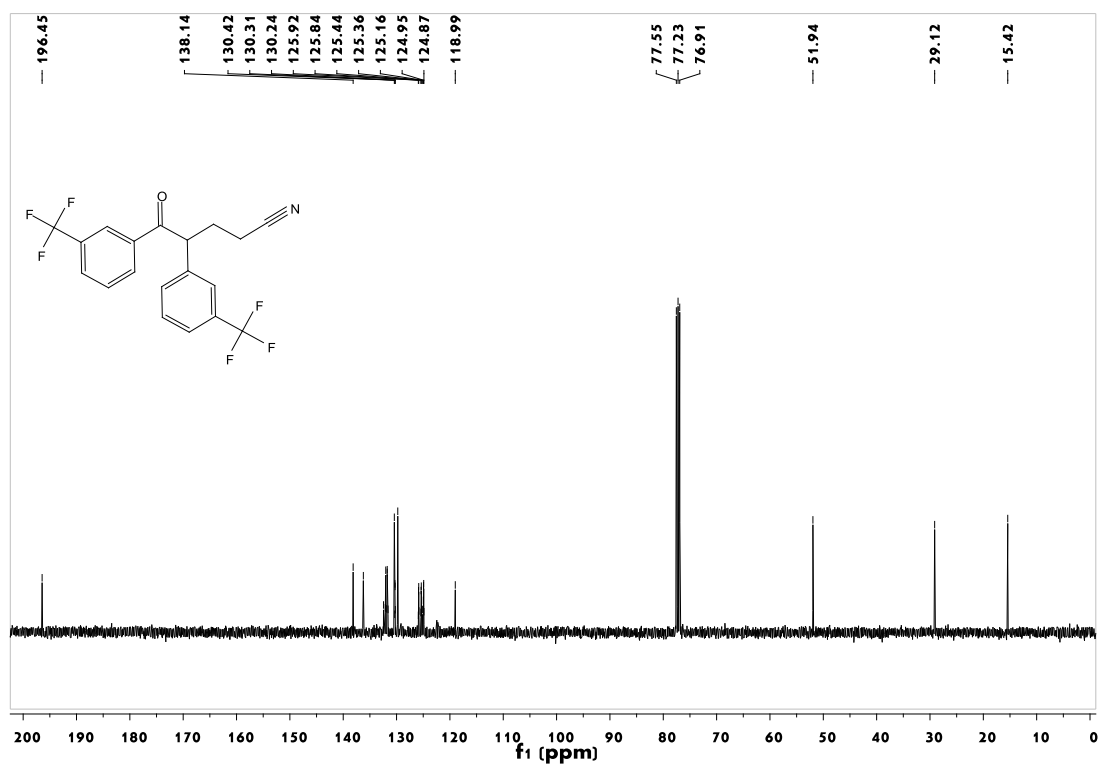

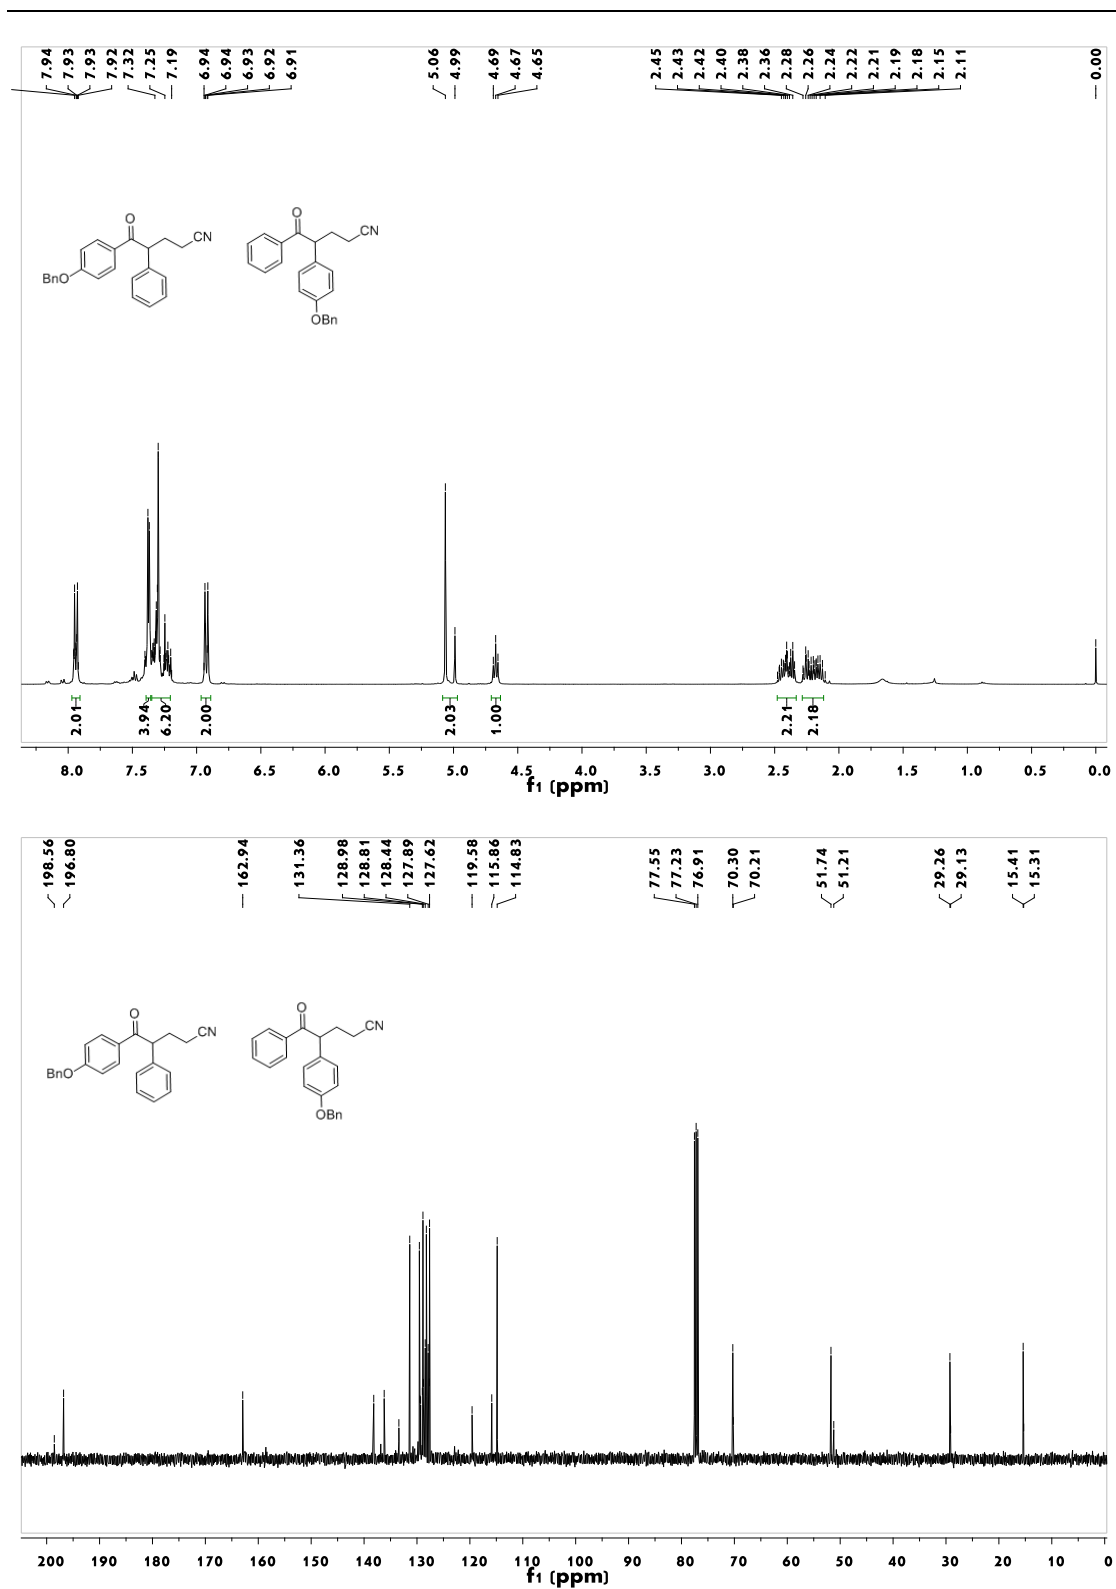

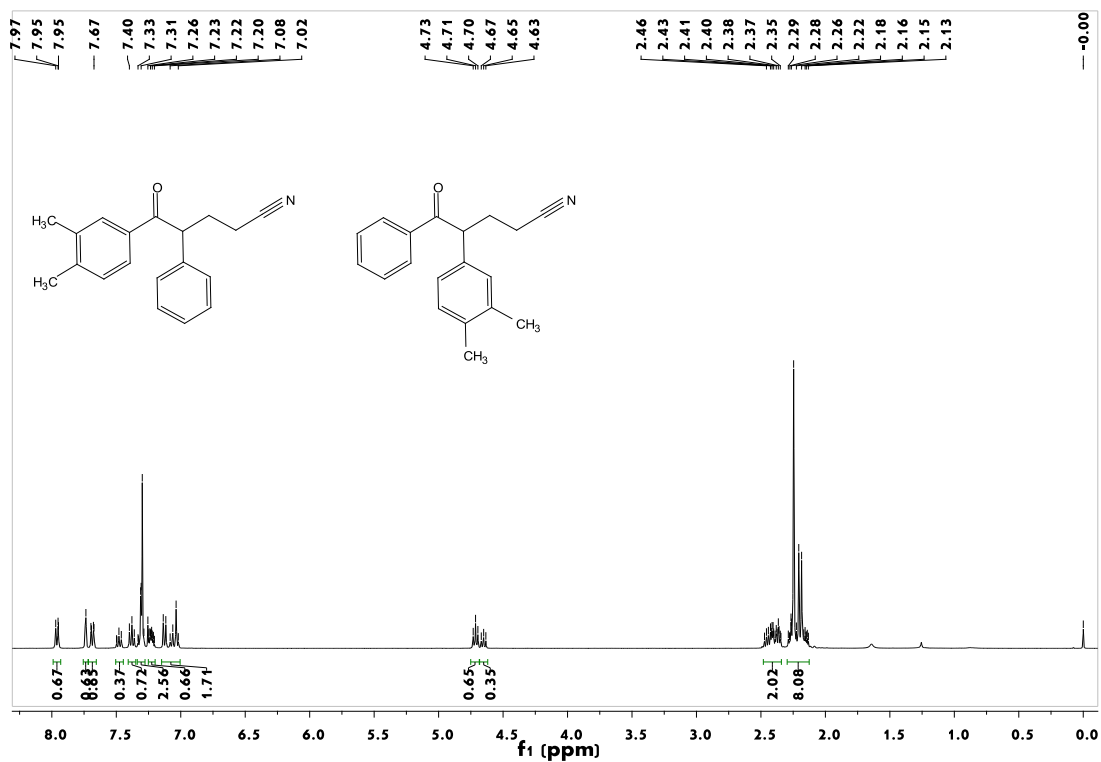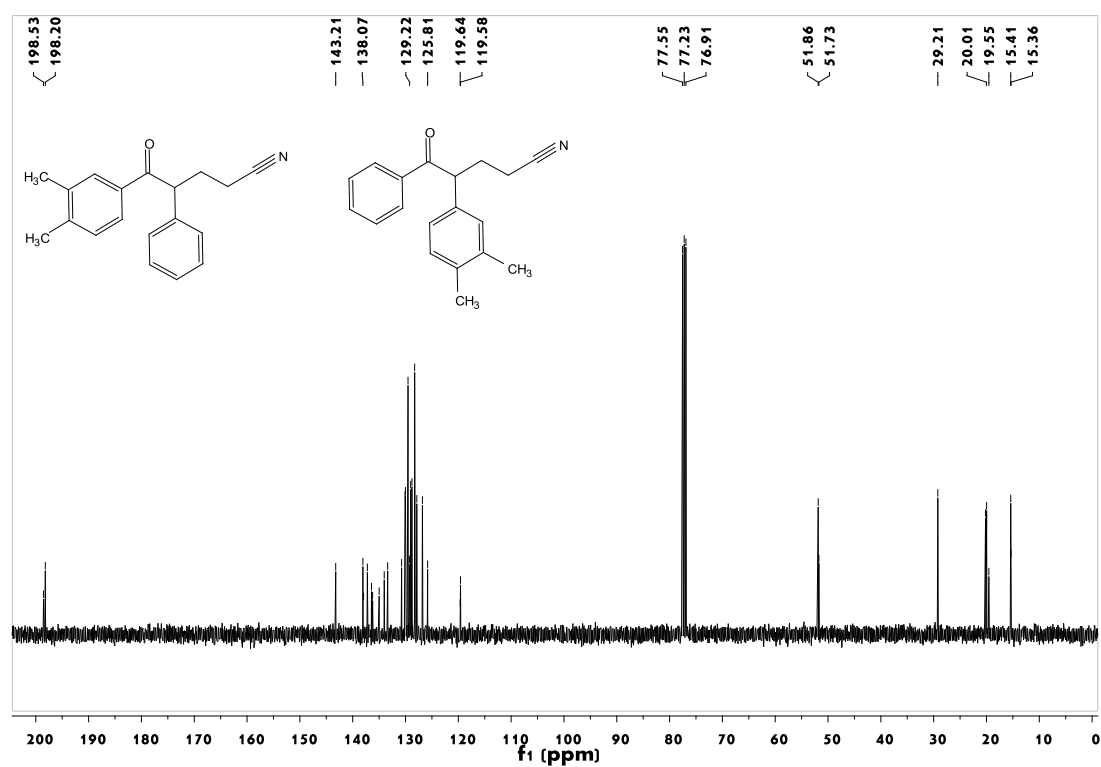

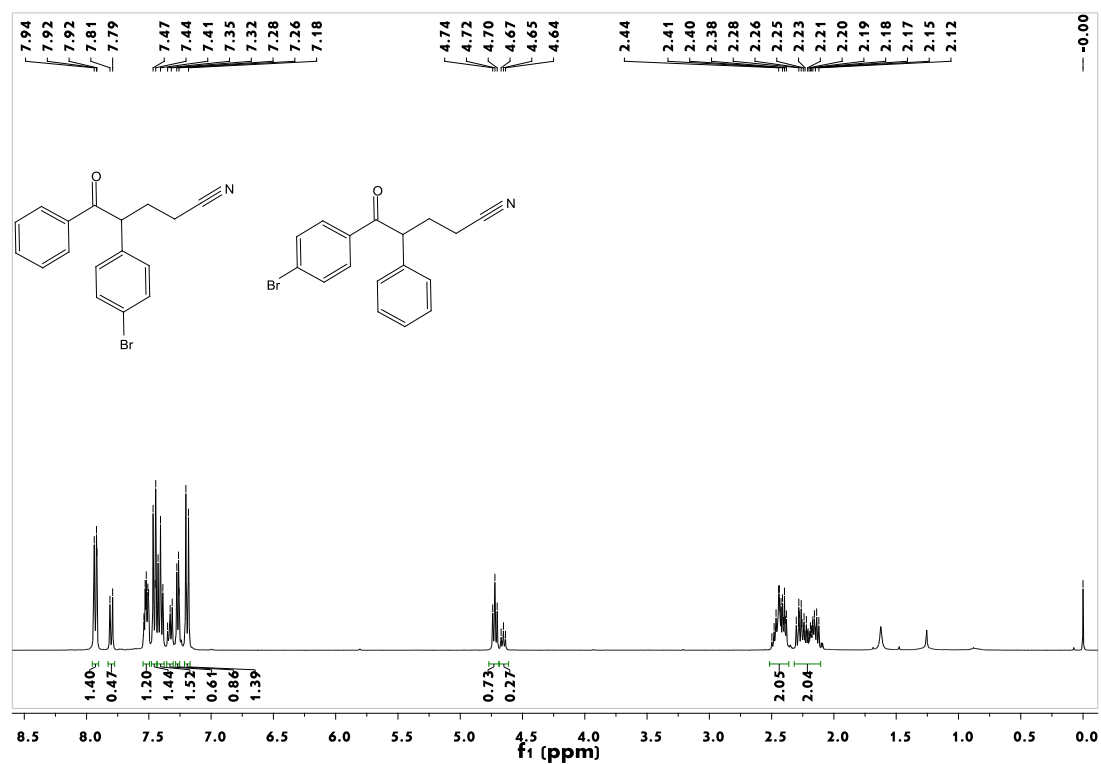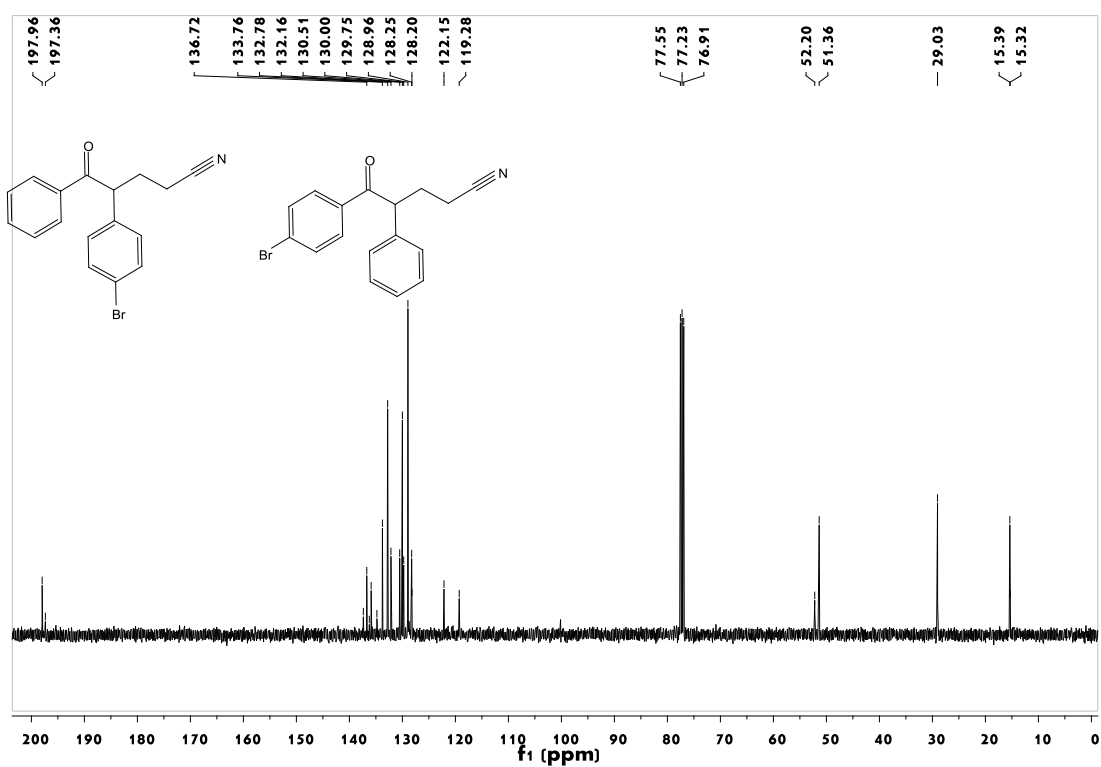

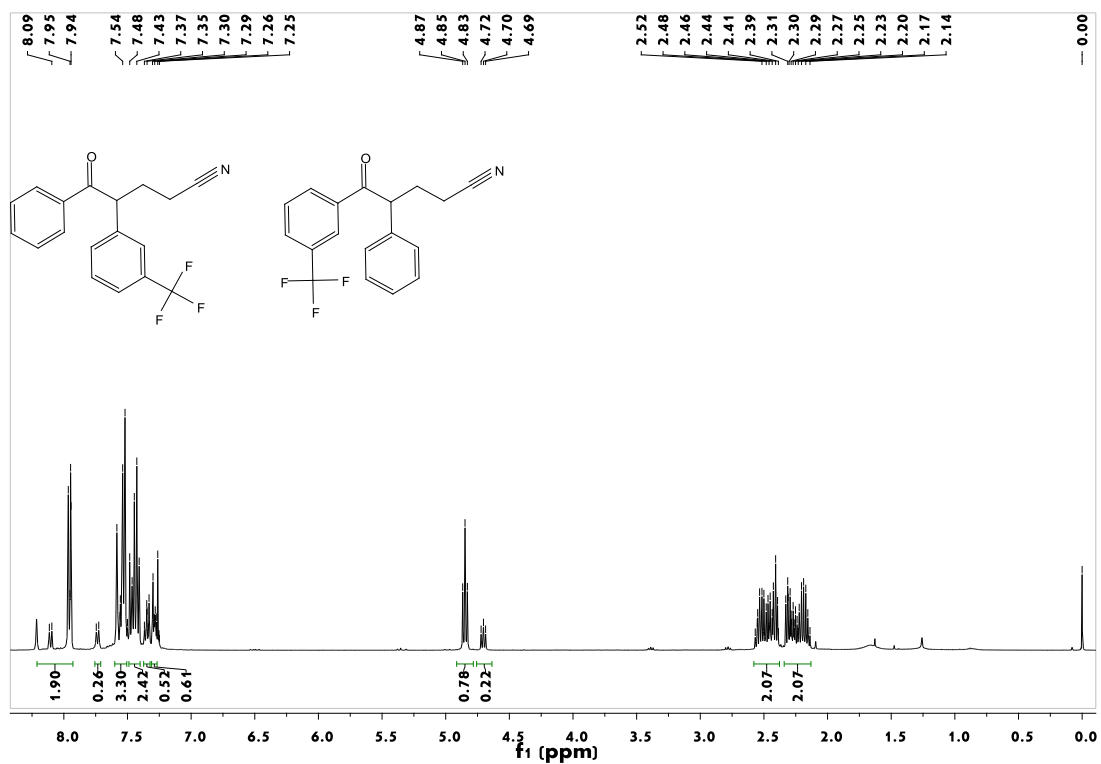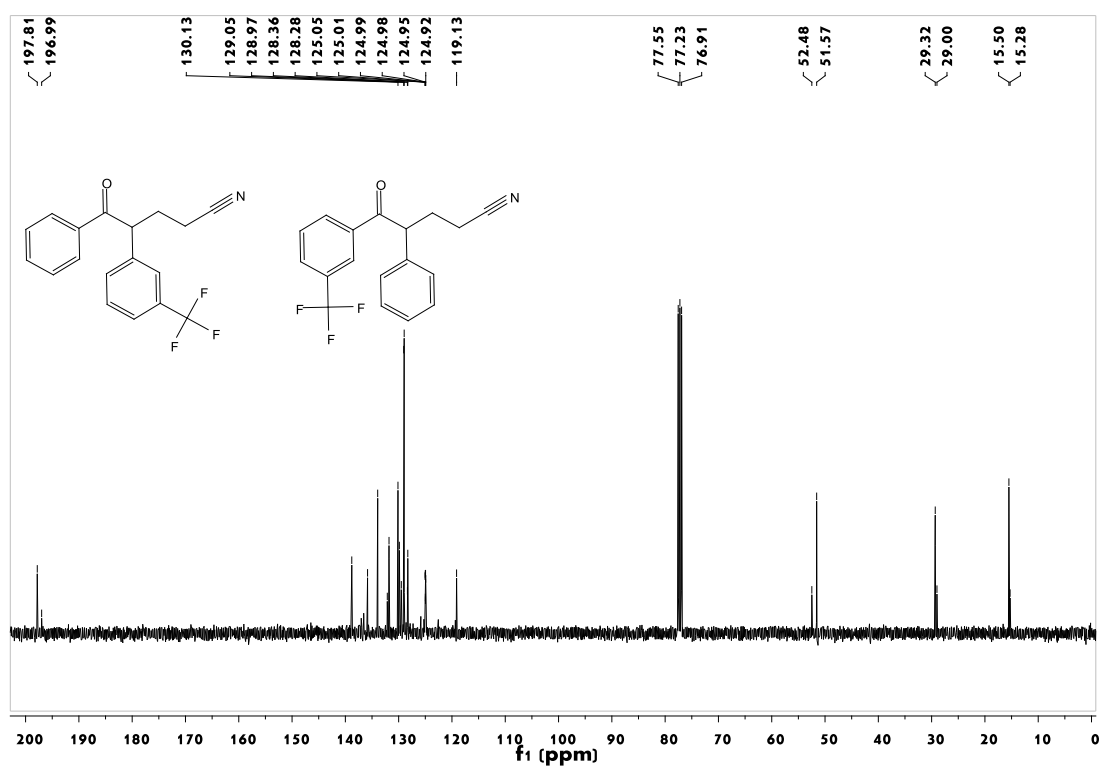

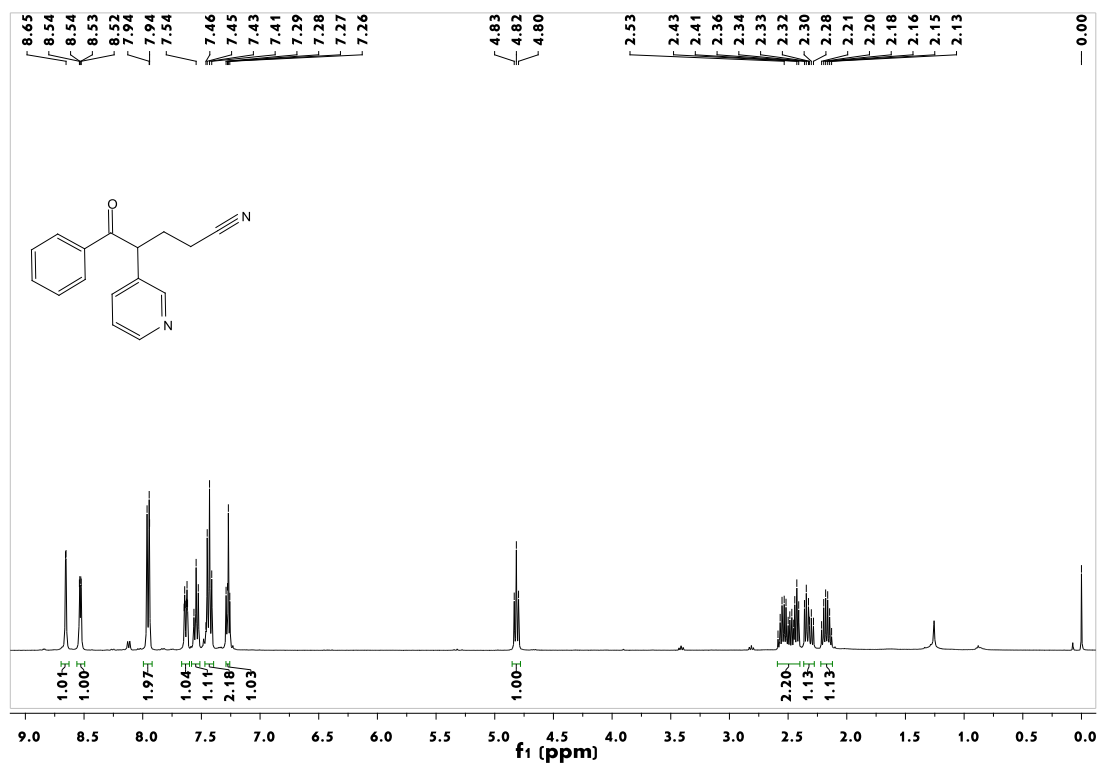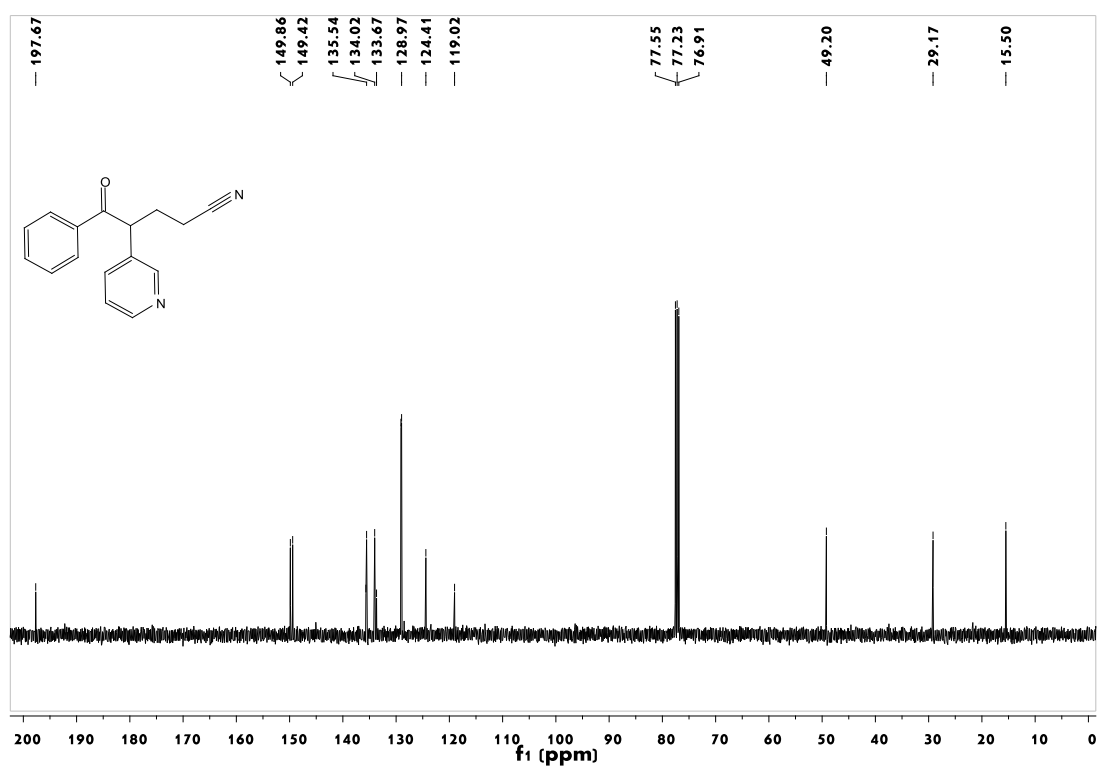

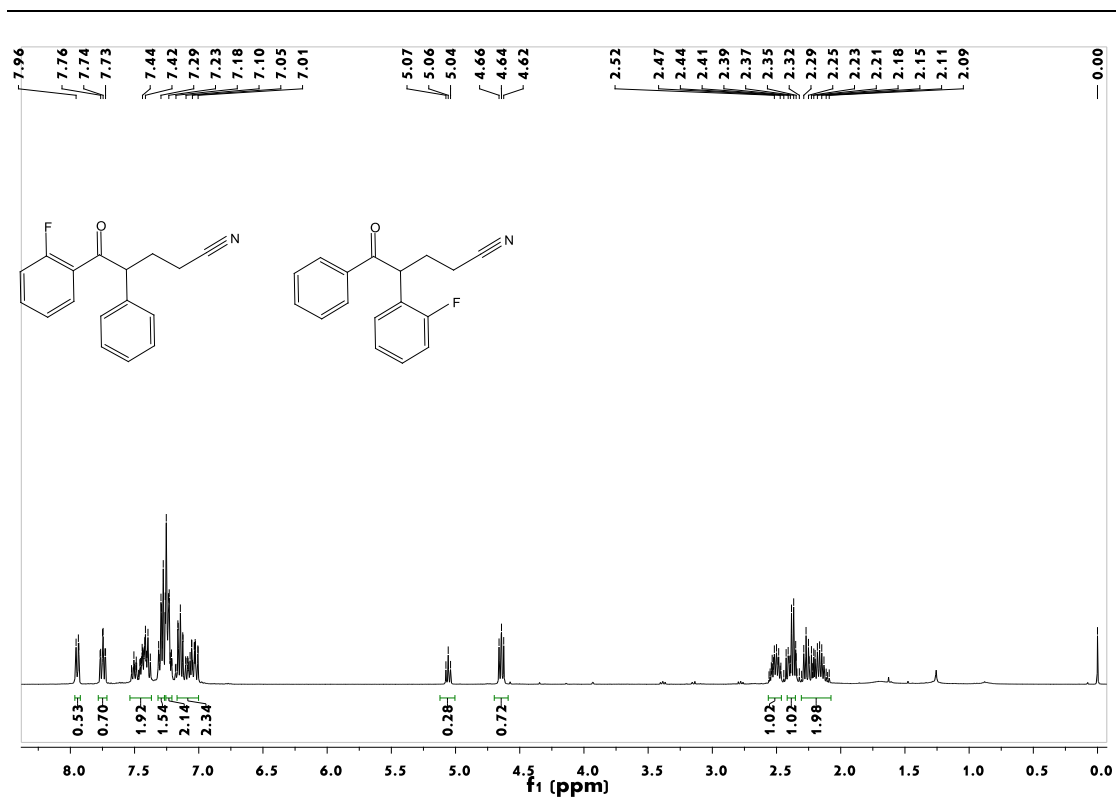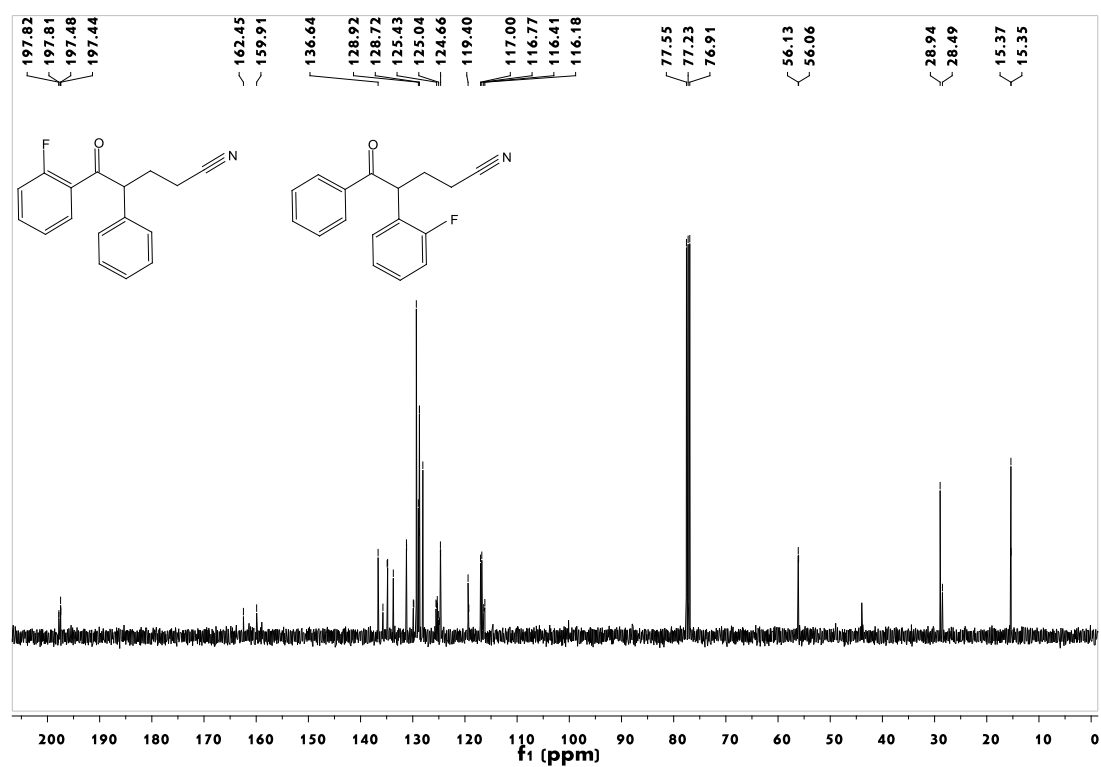

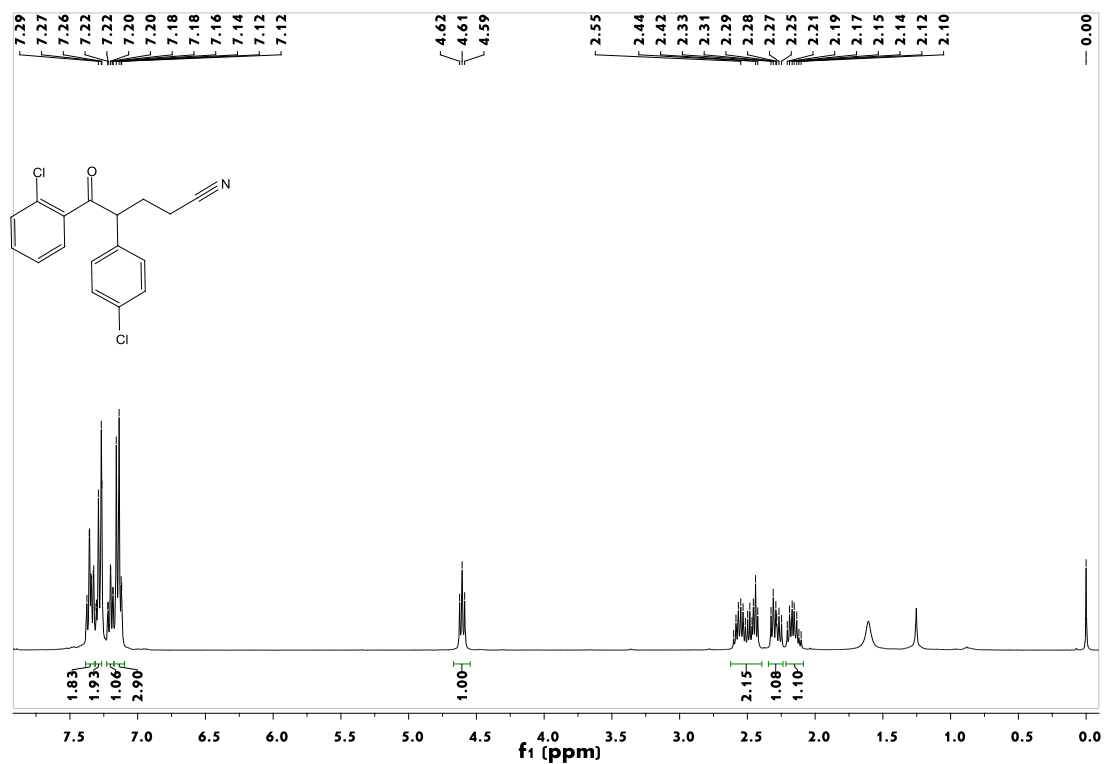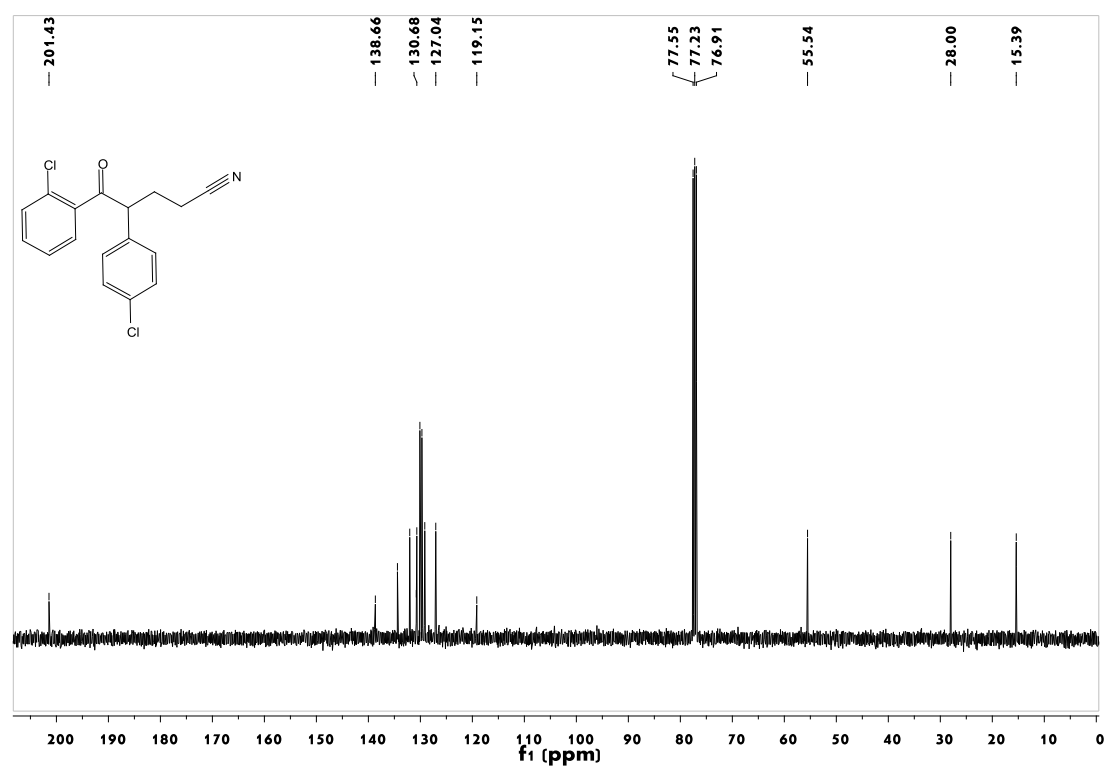



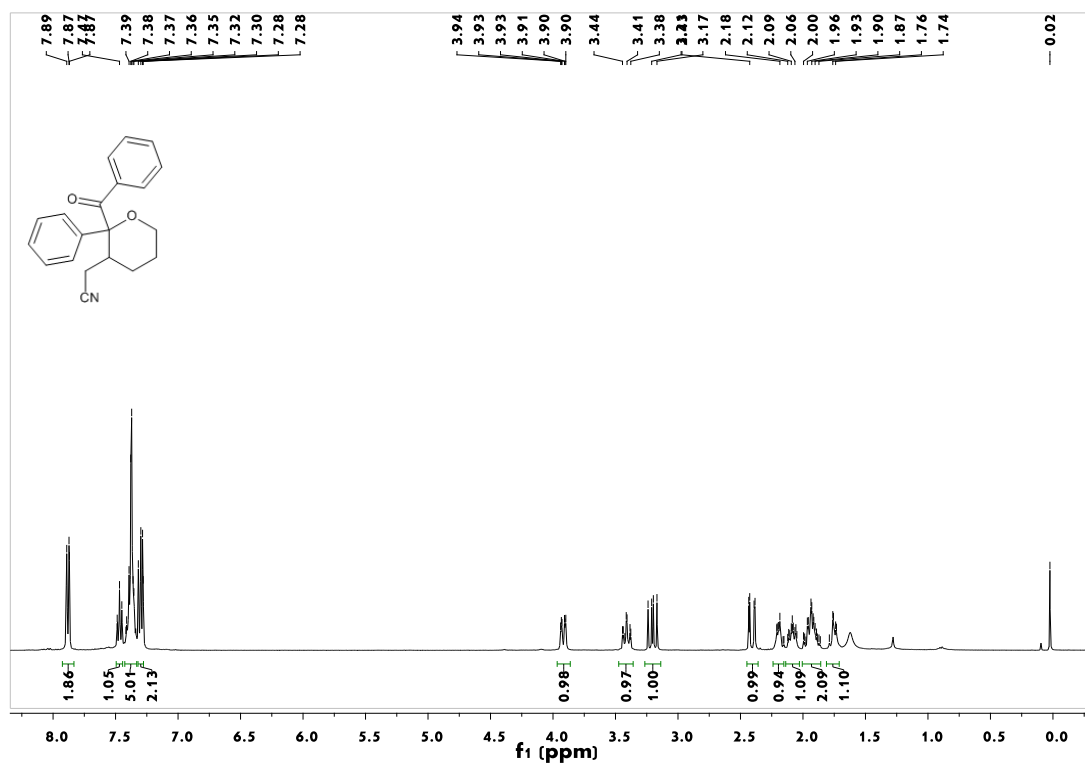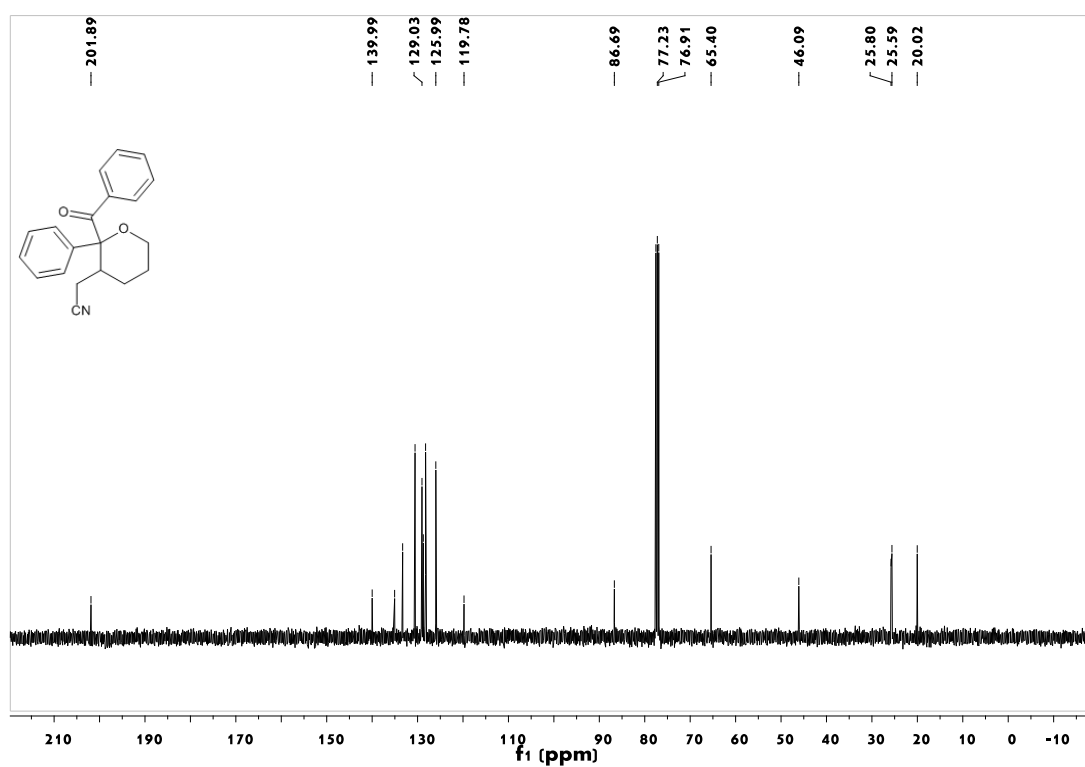

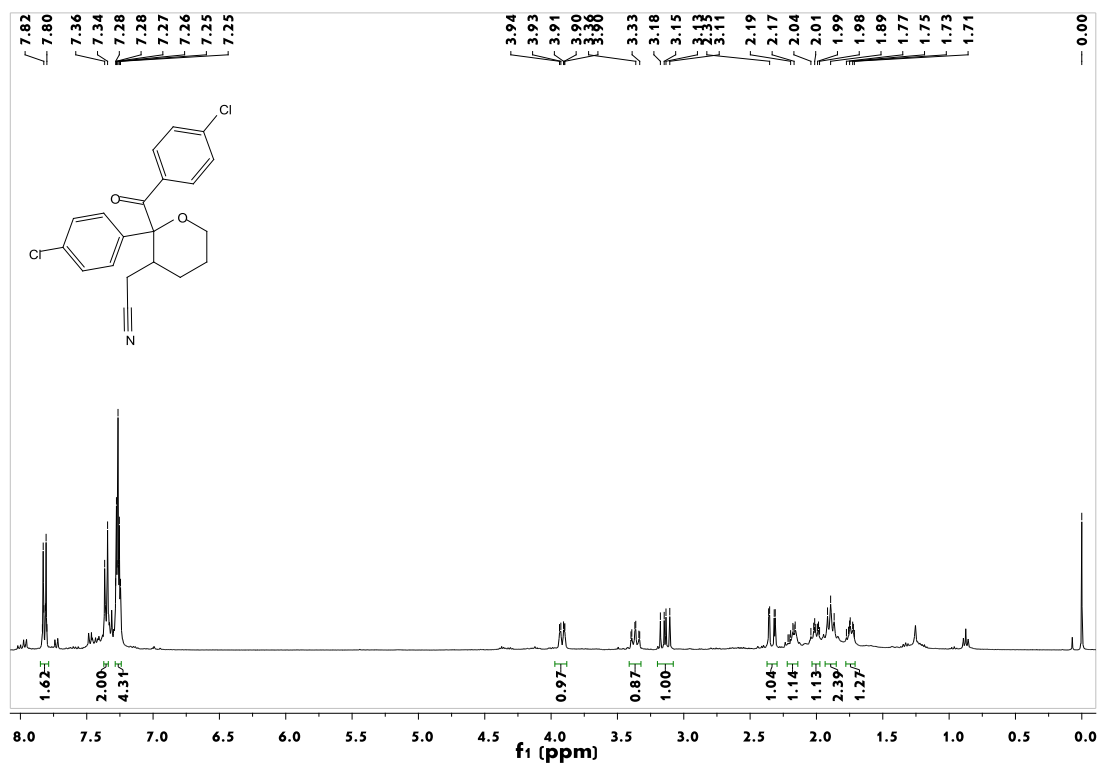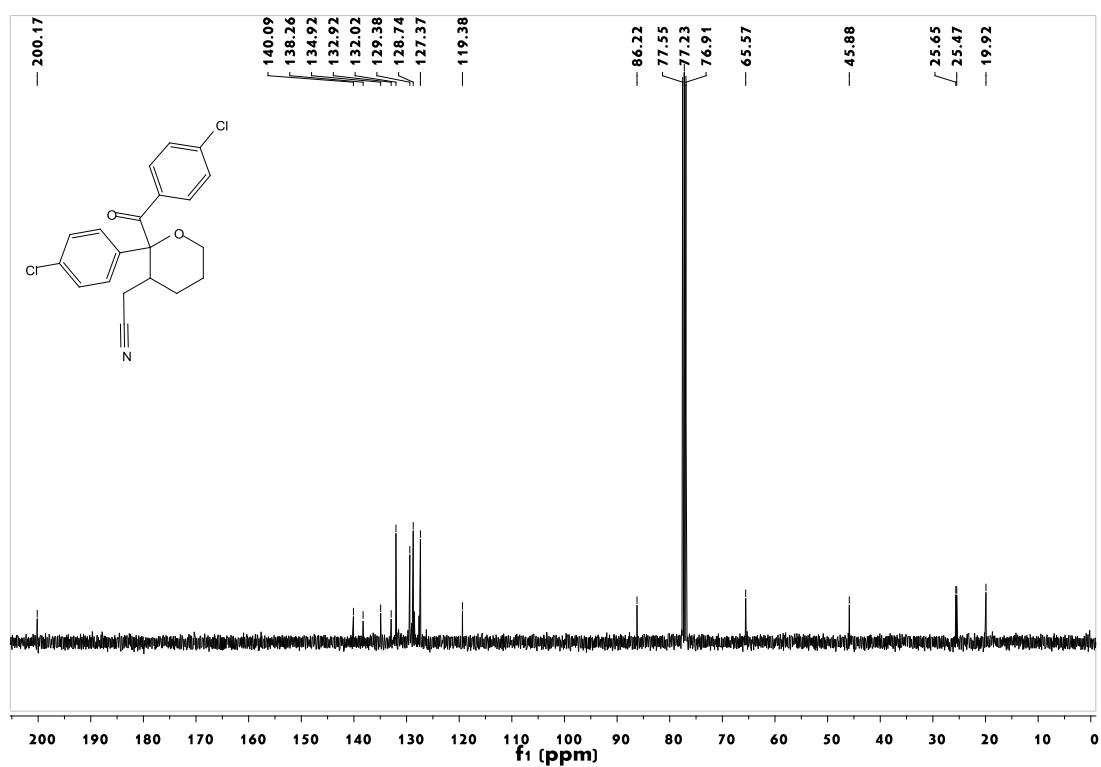

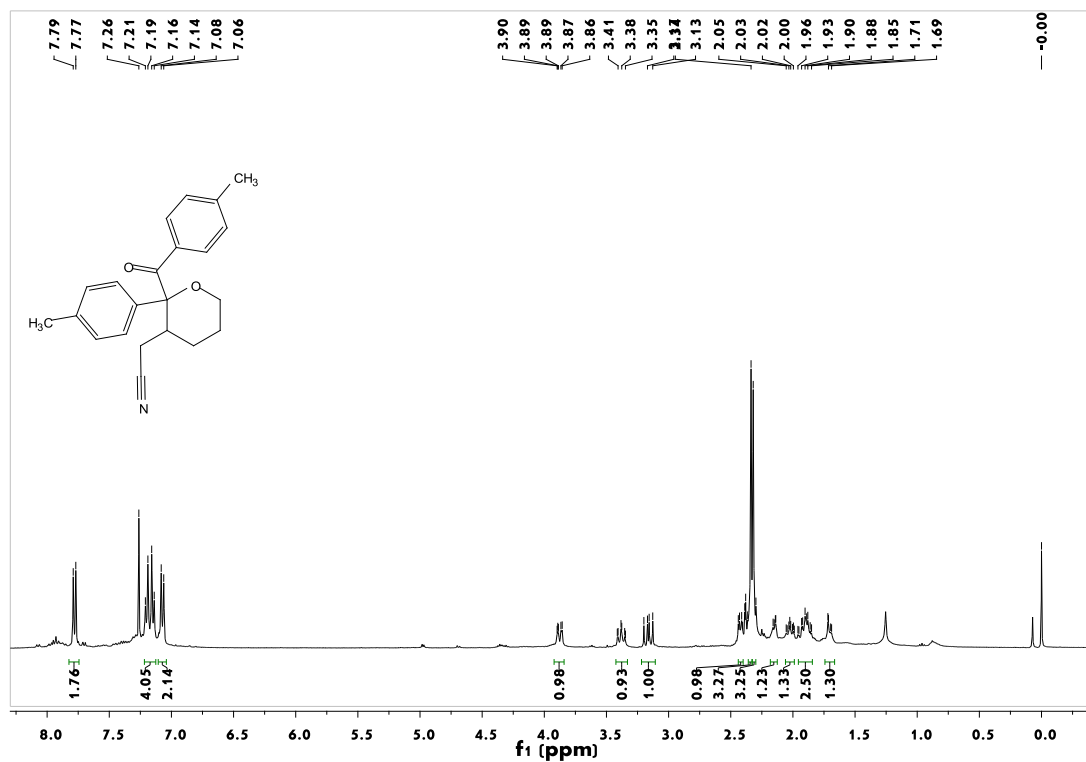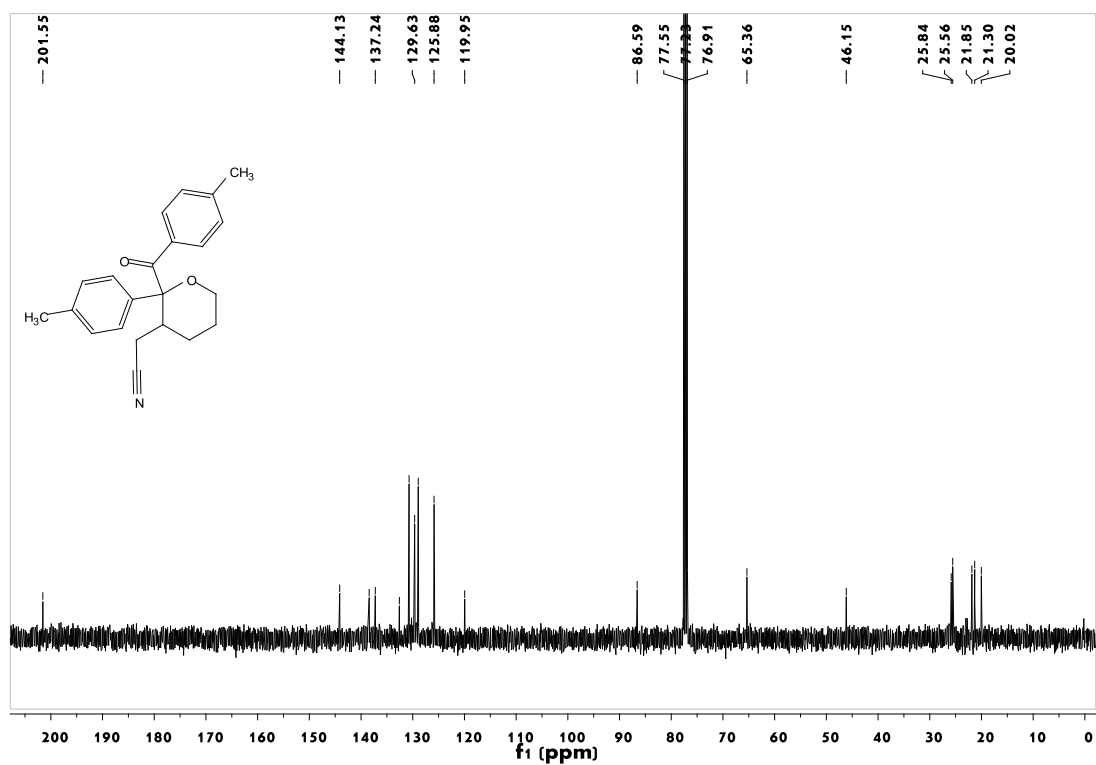

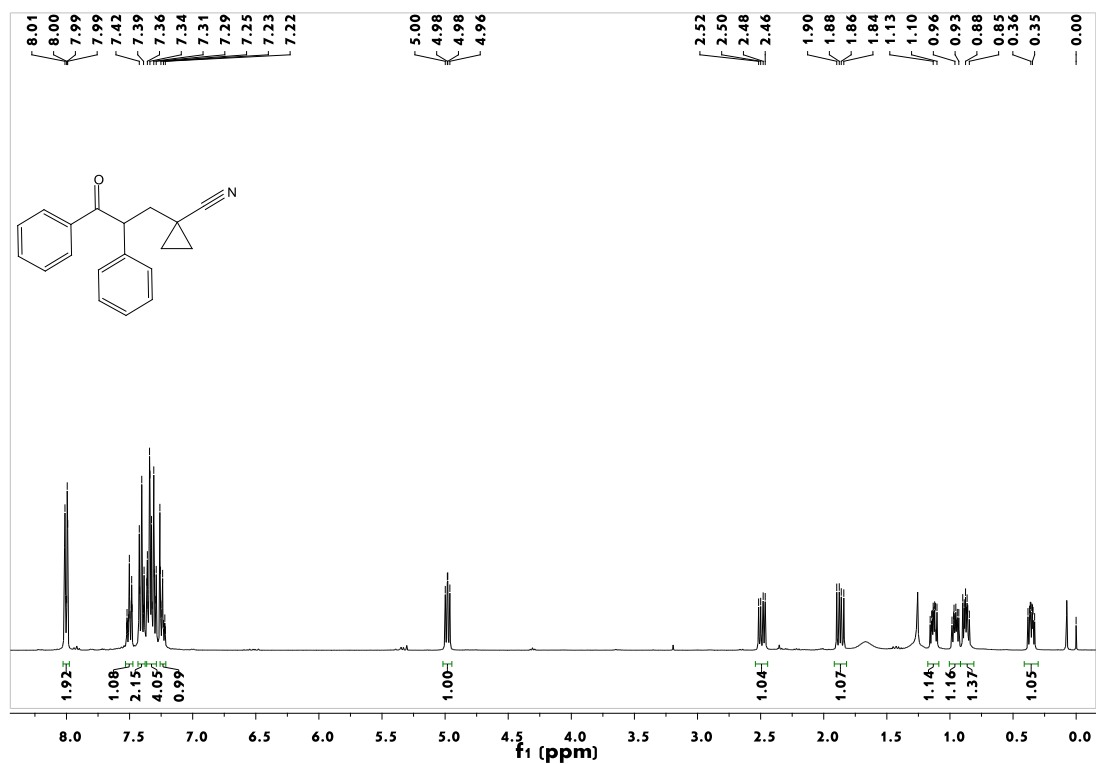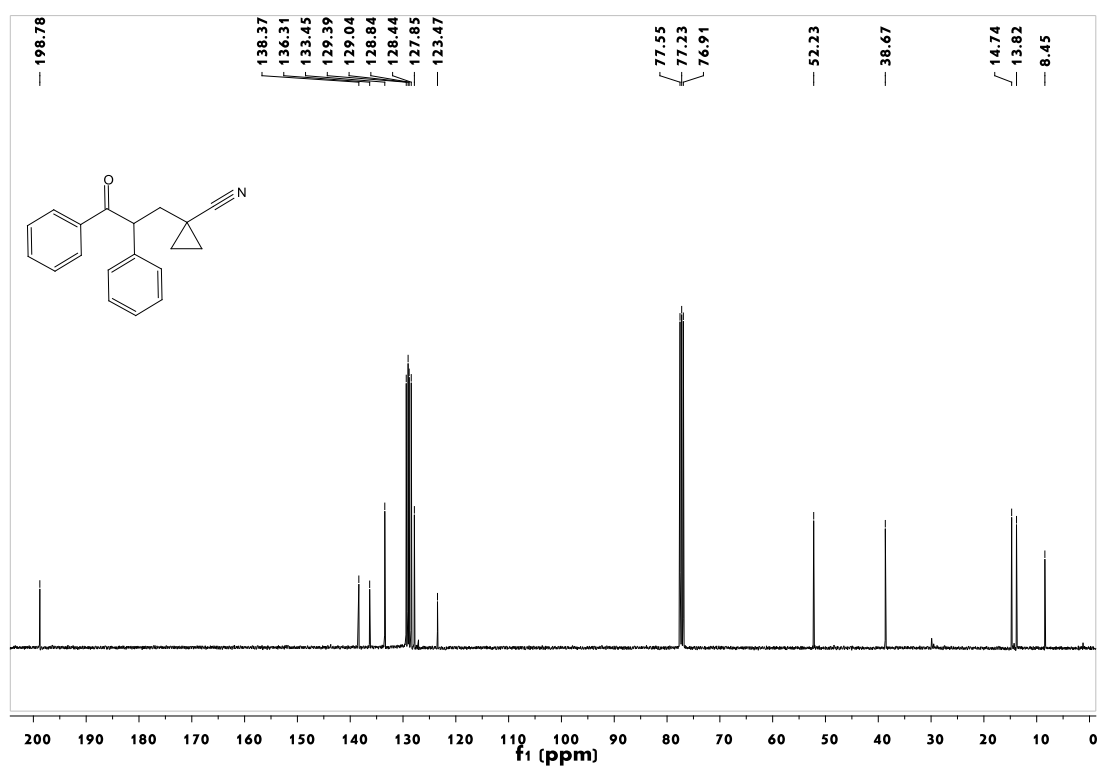

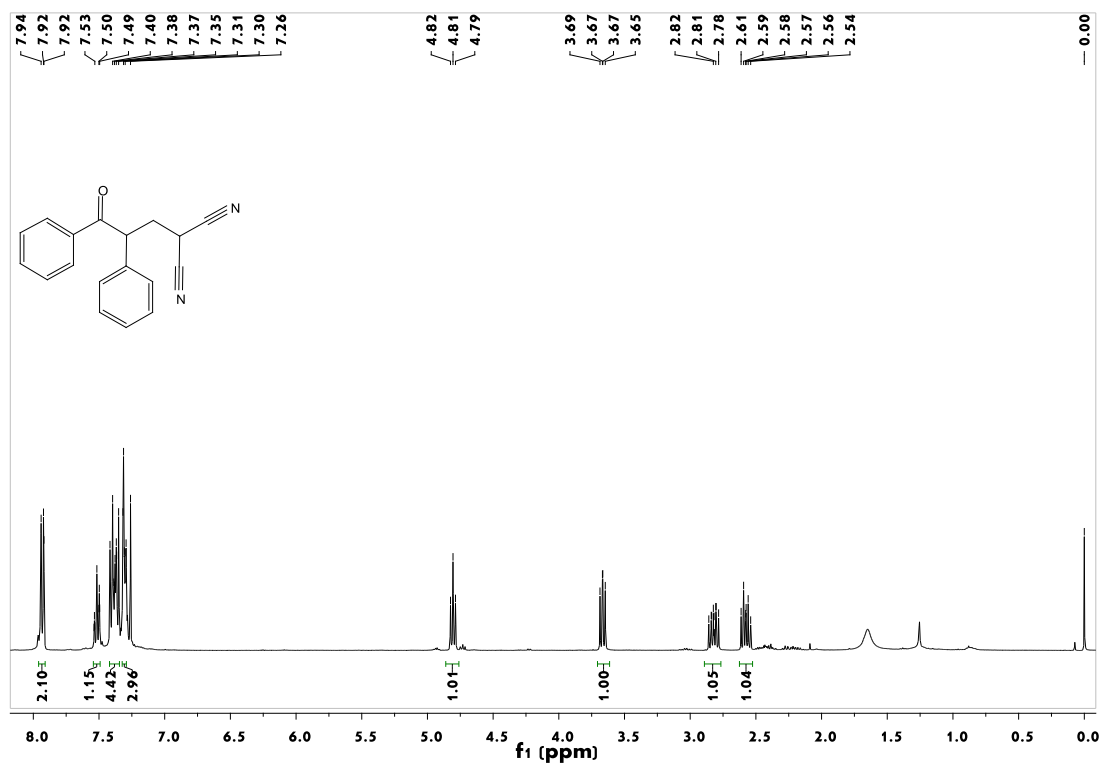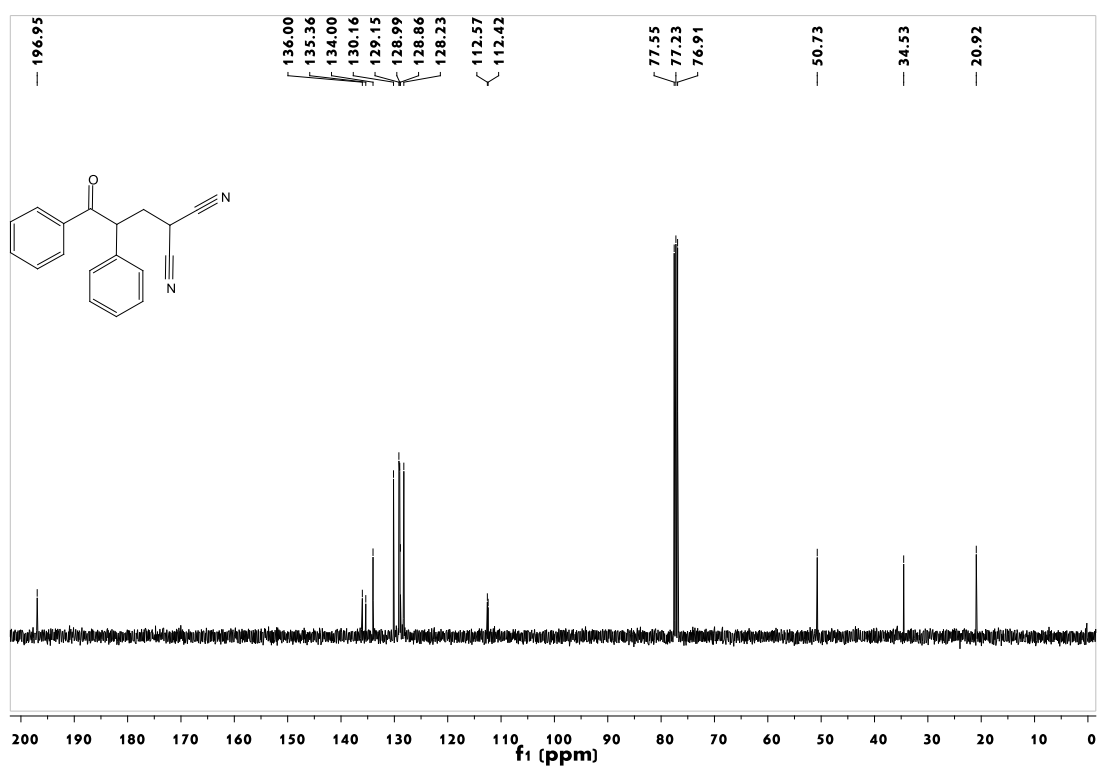

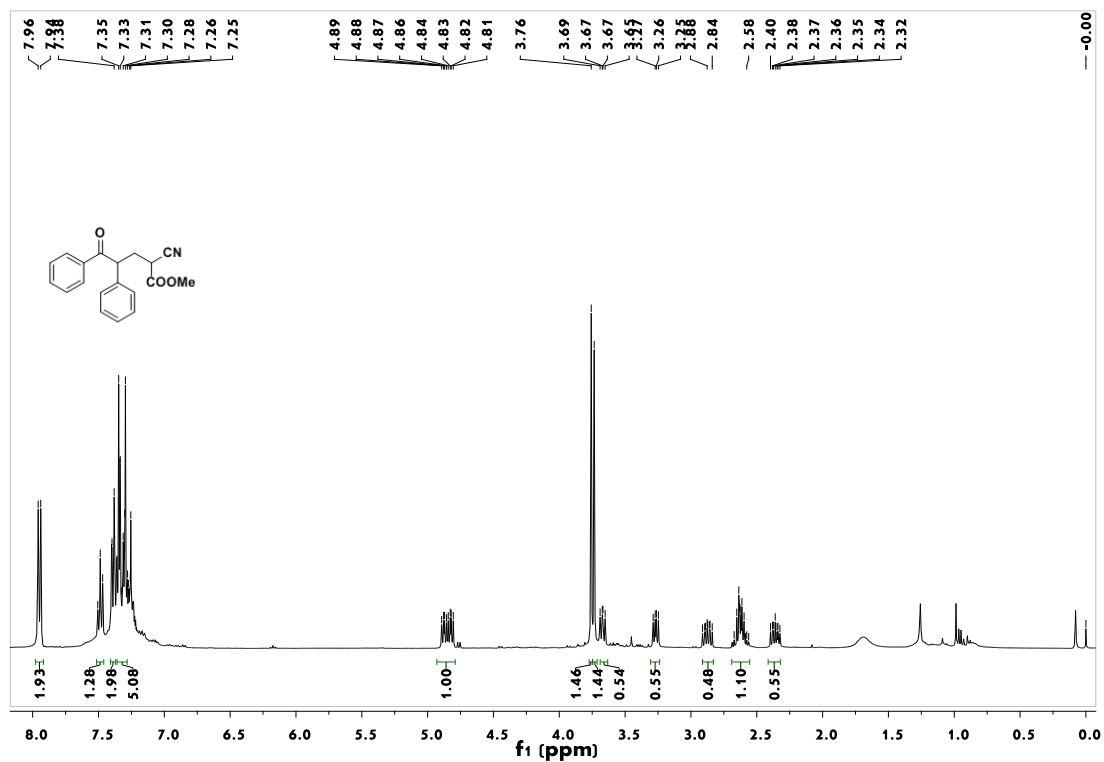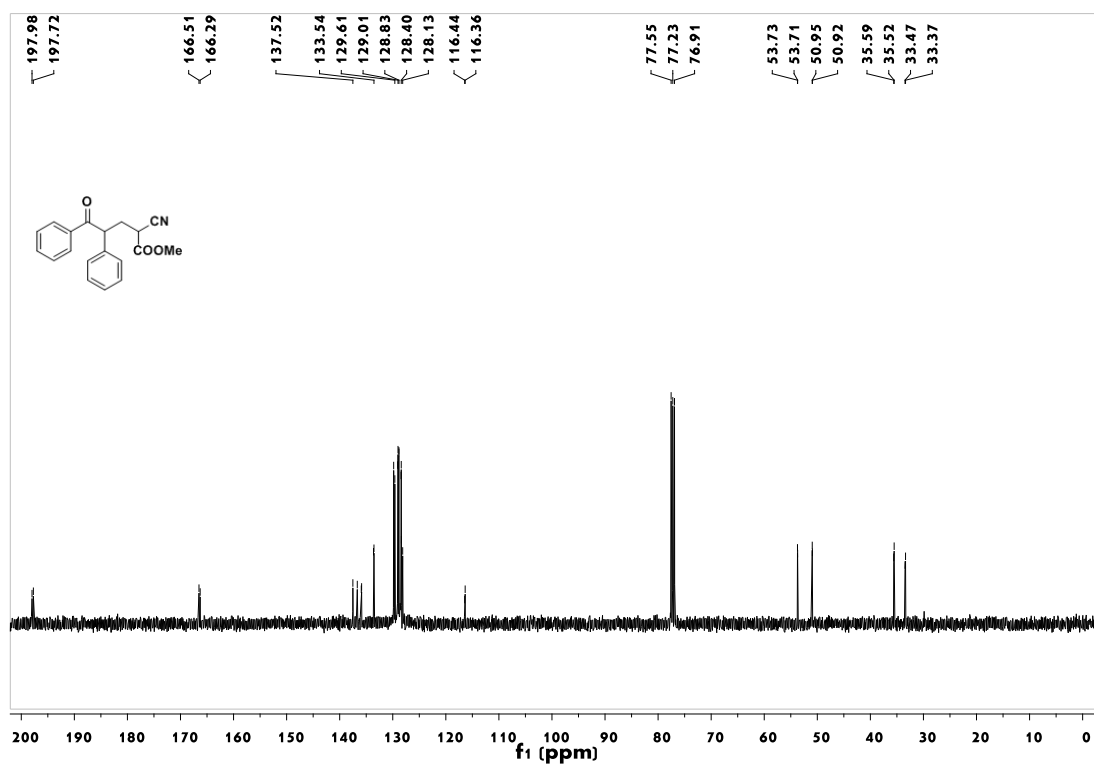

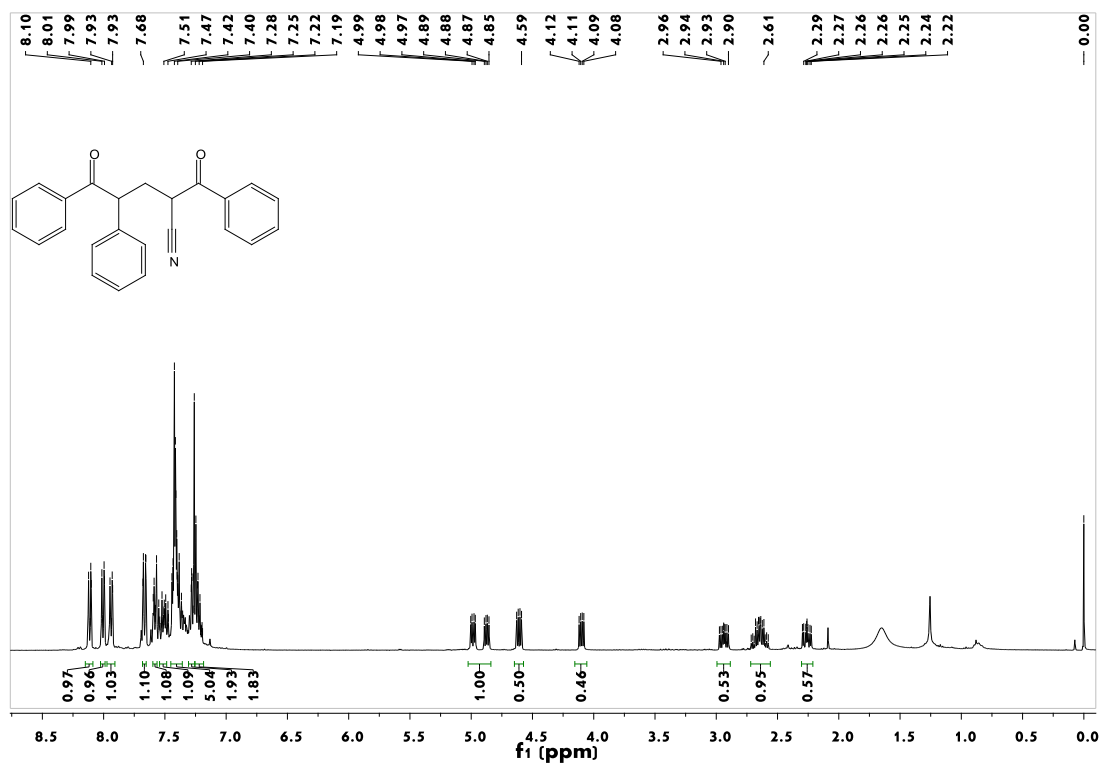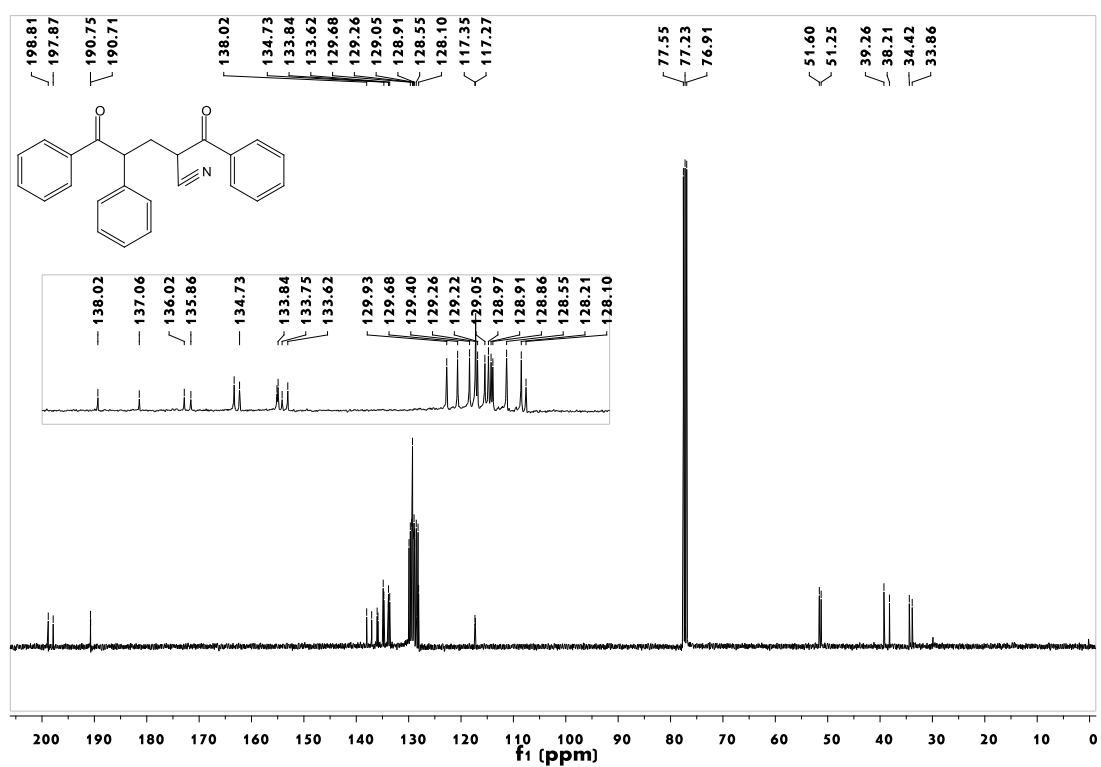

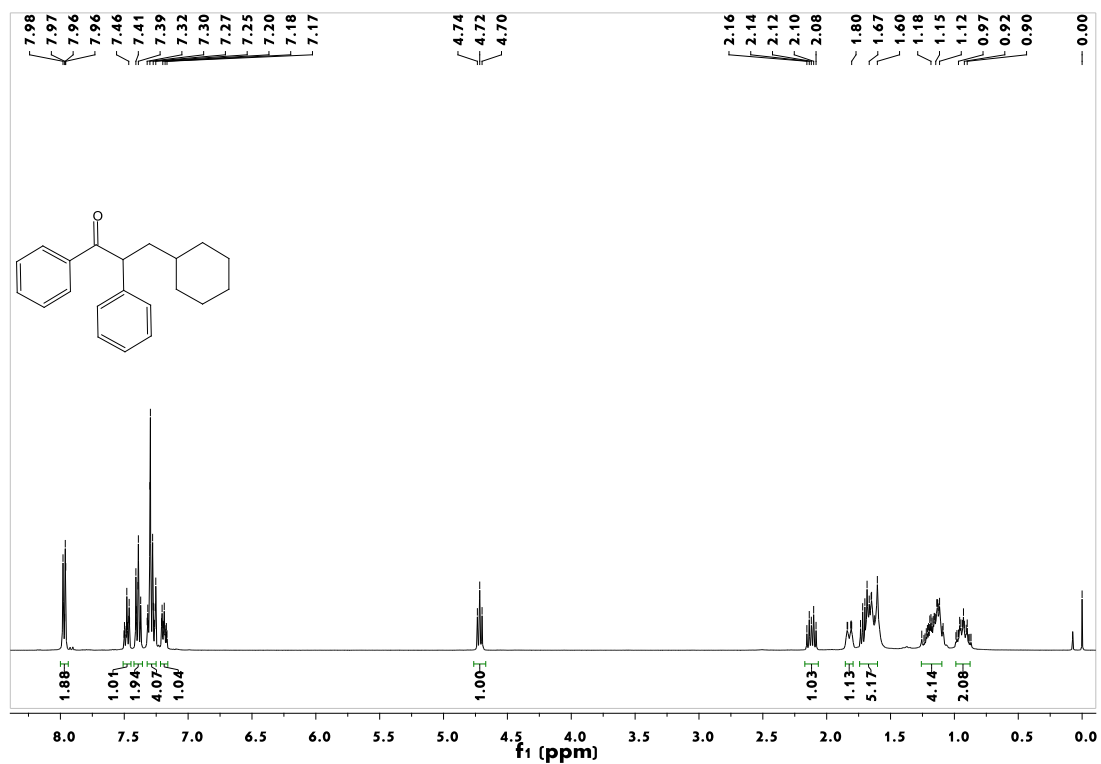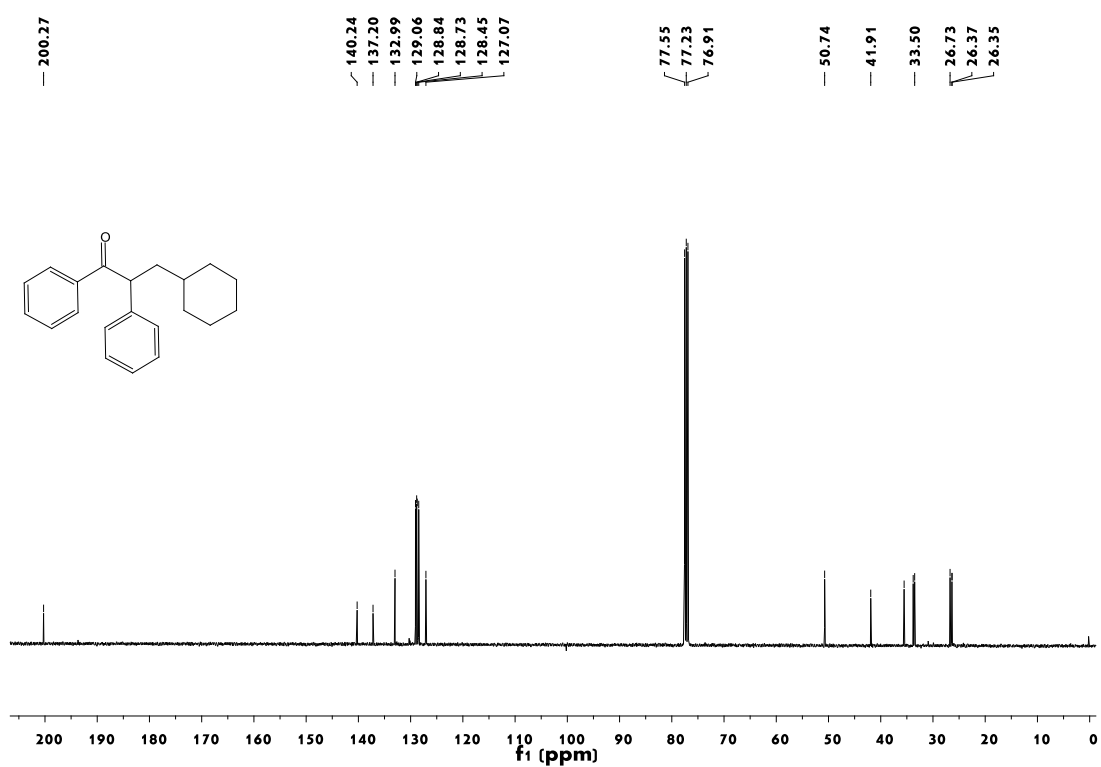



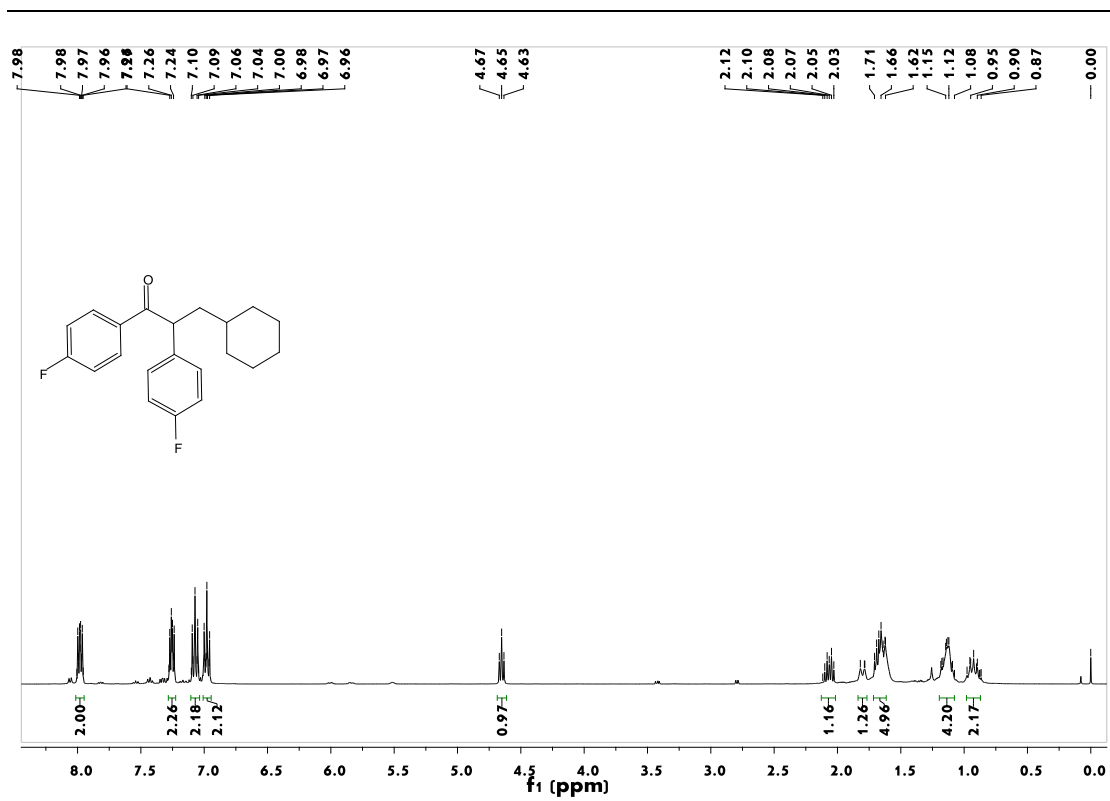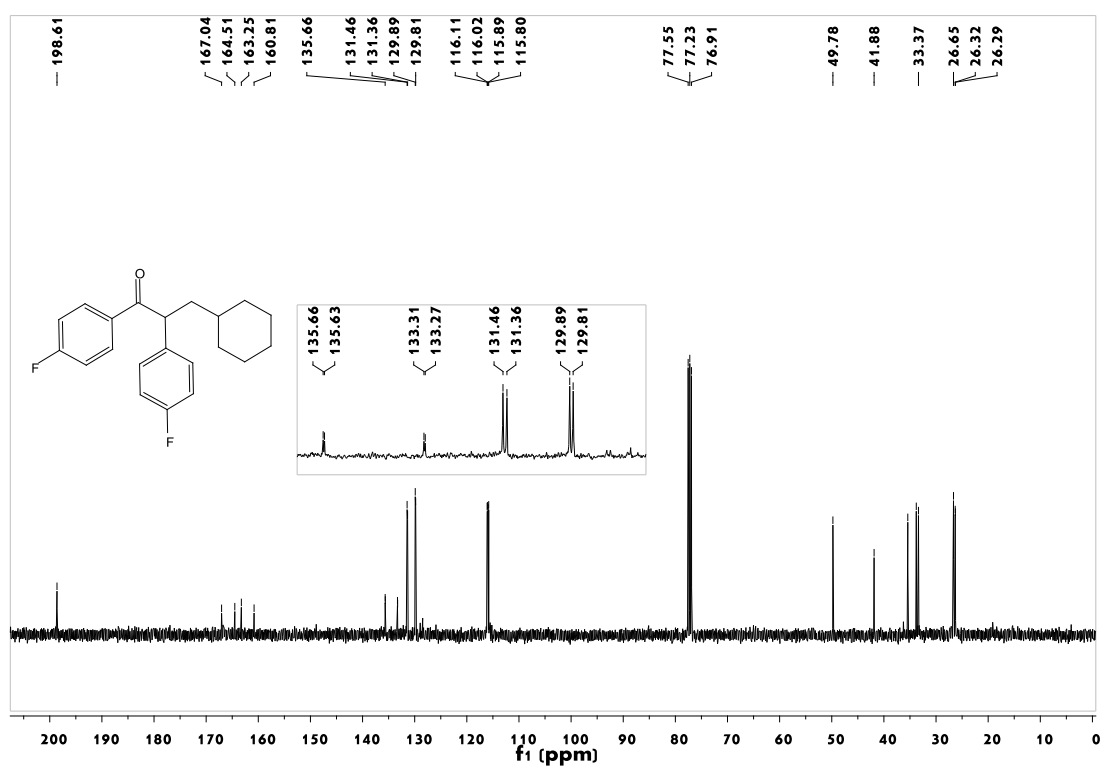

bn

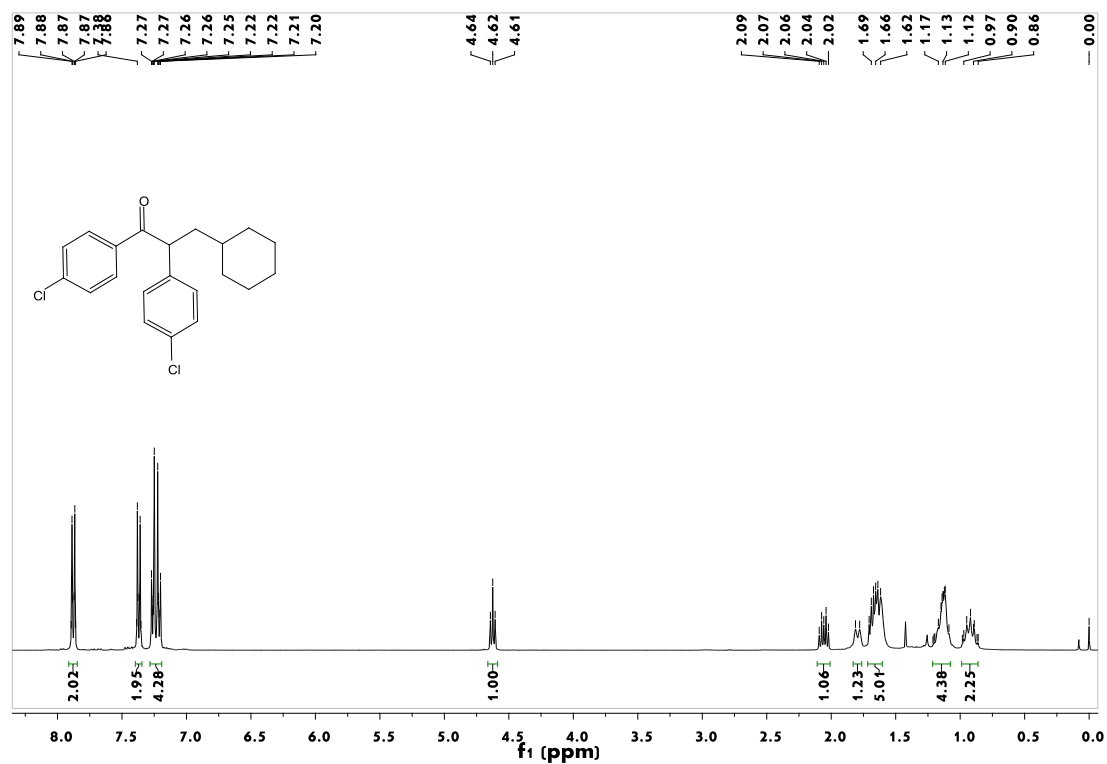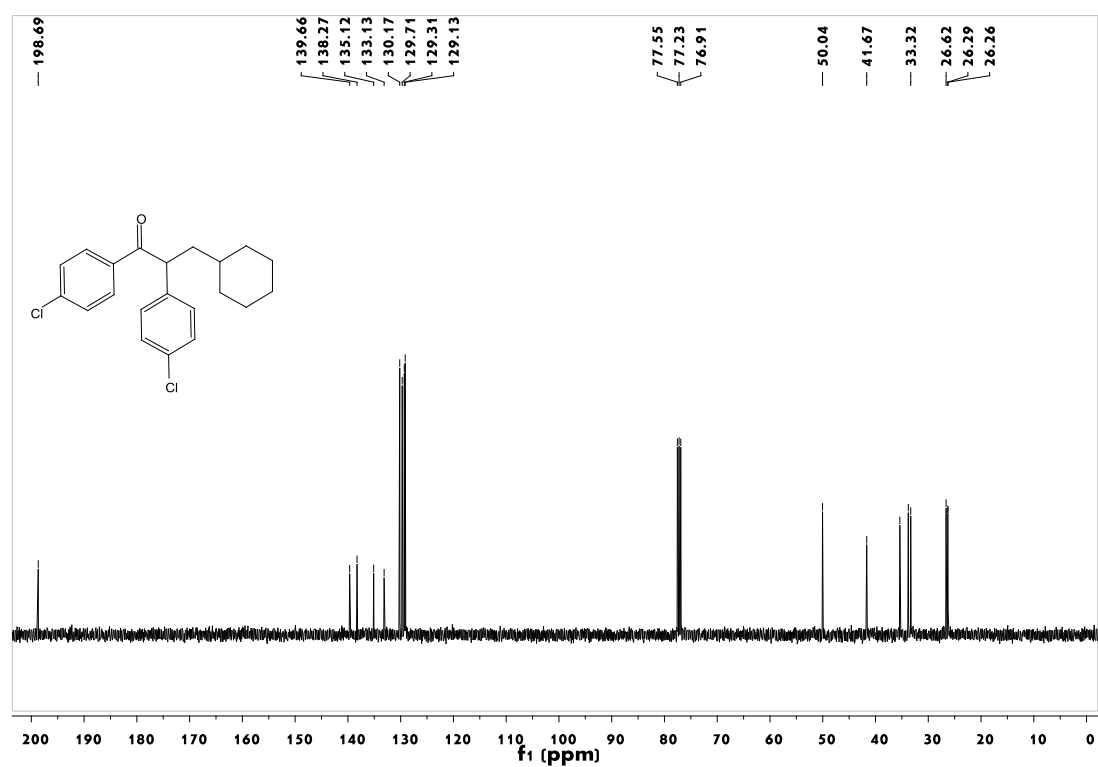

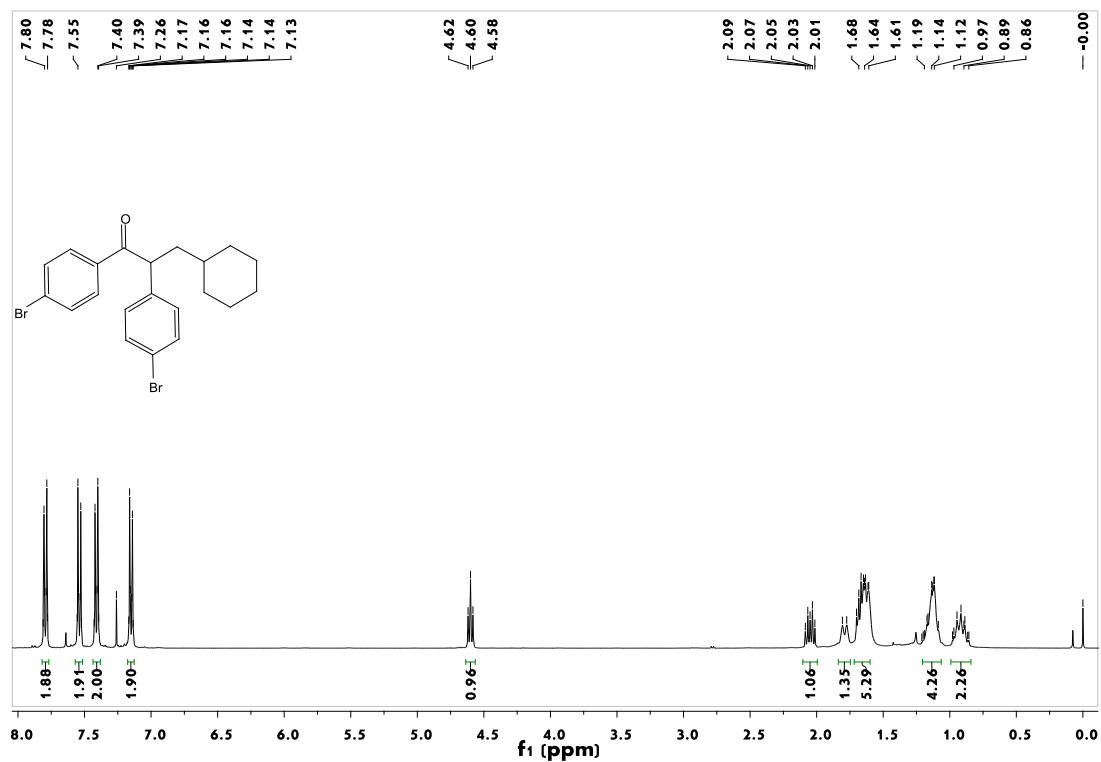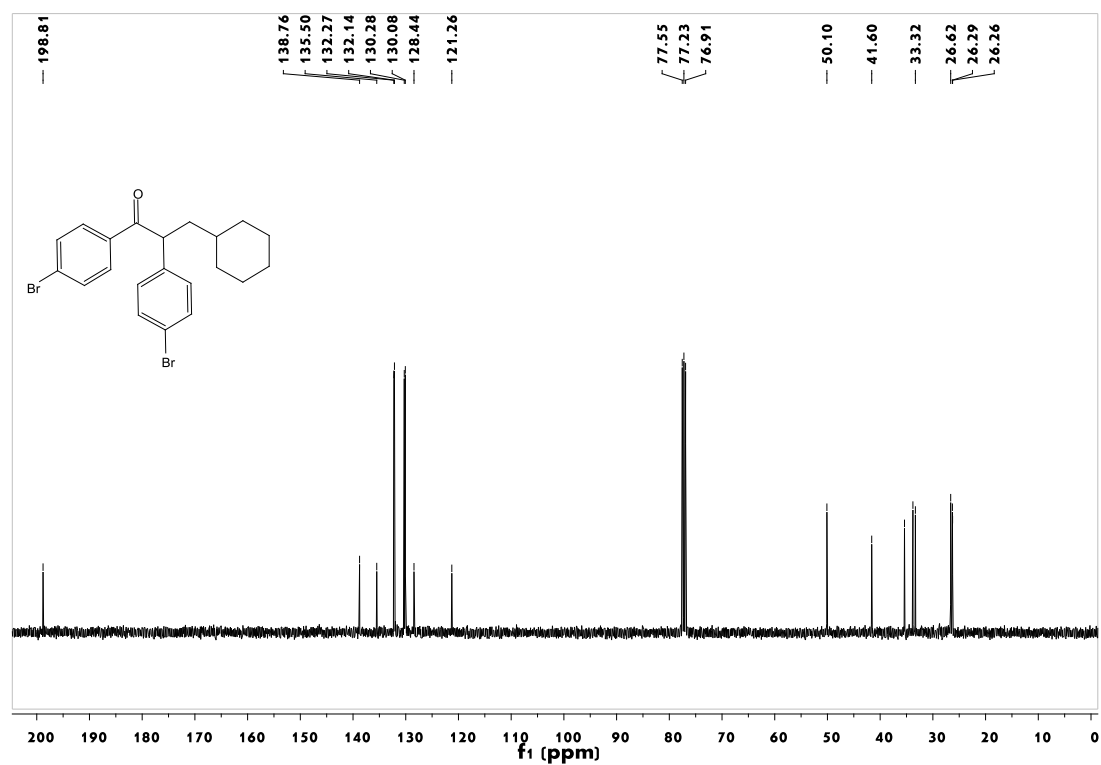

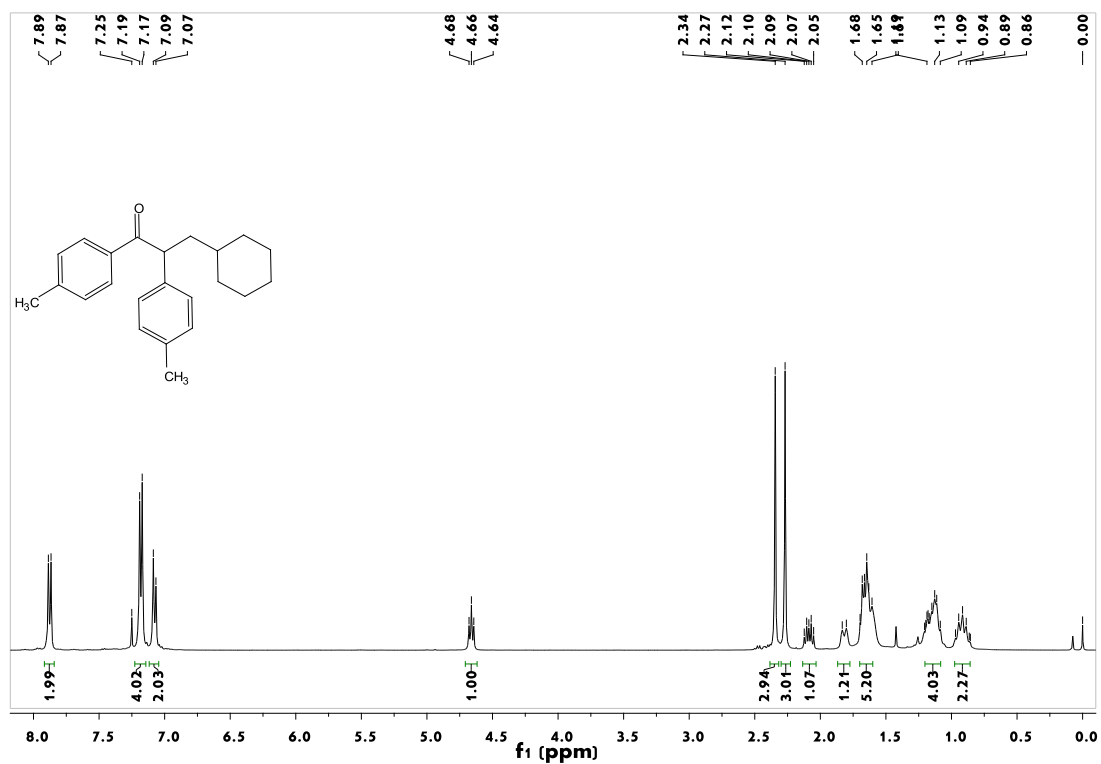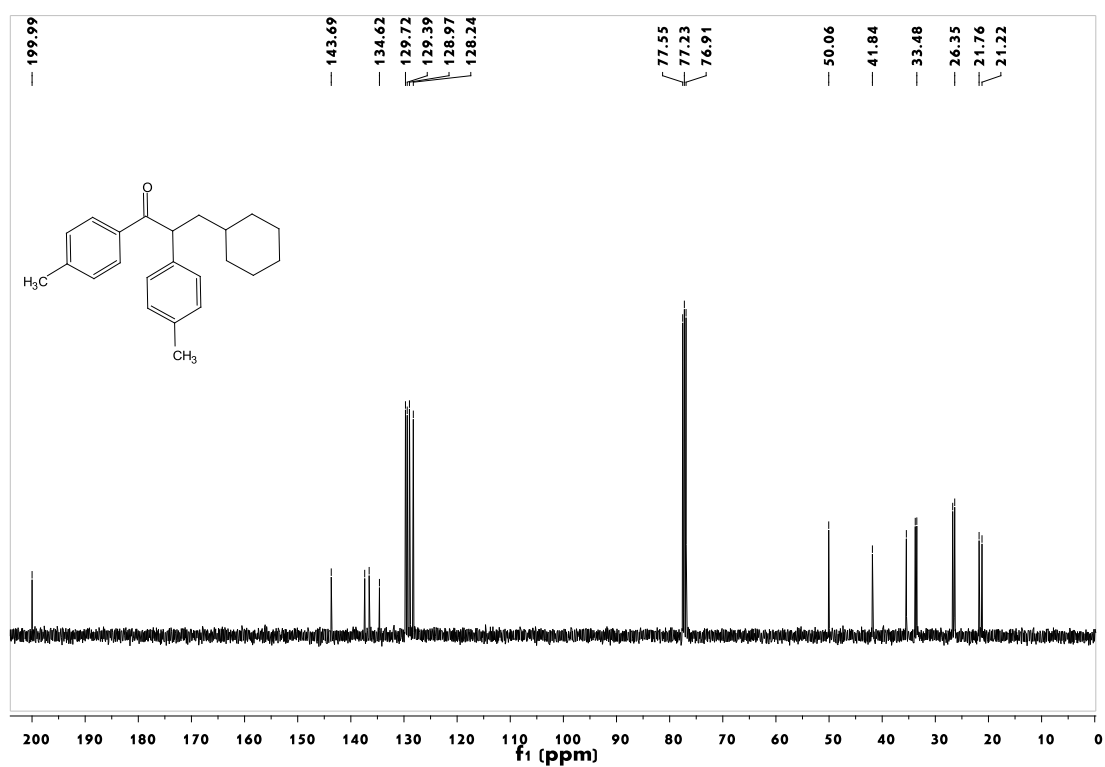

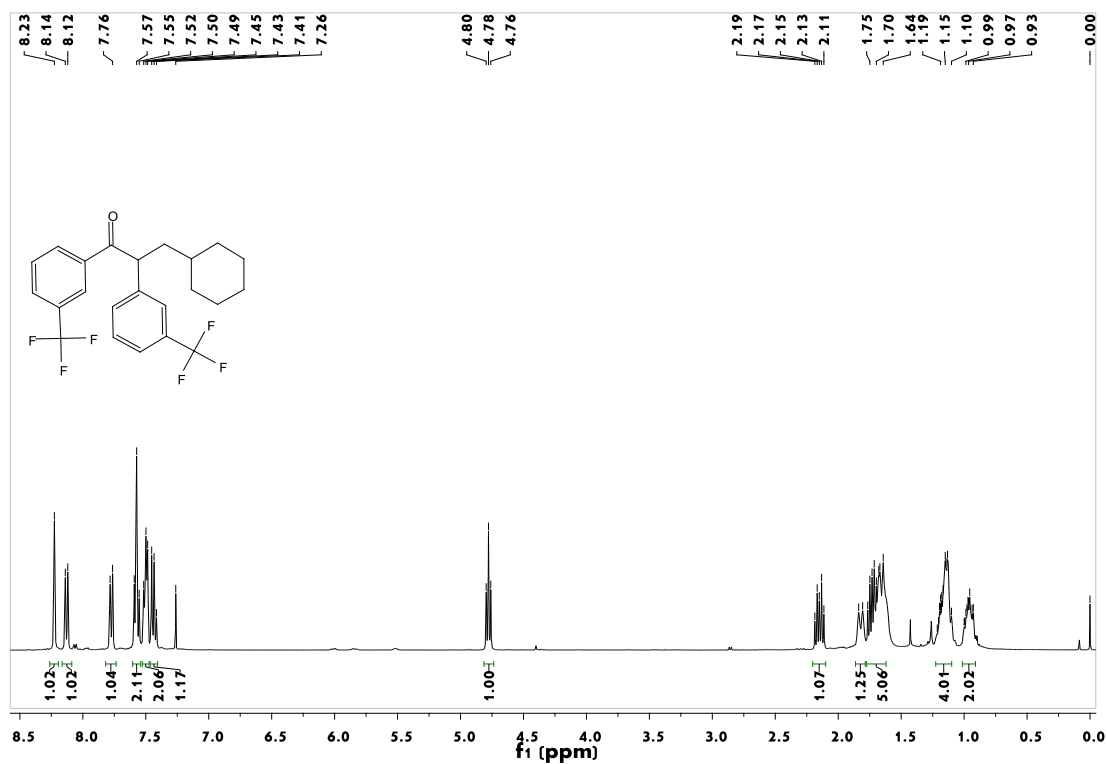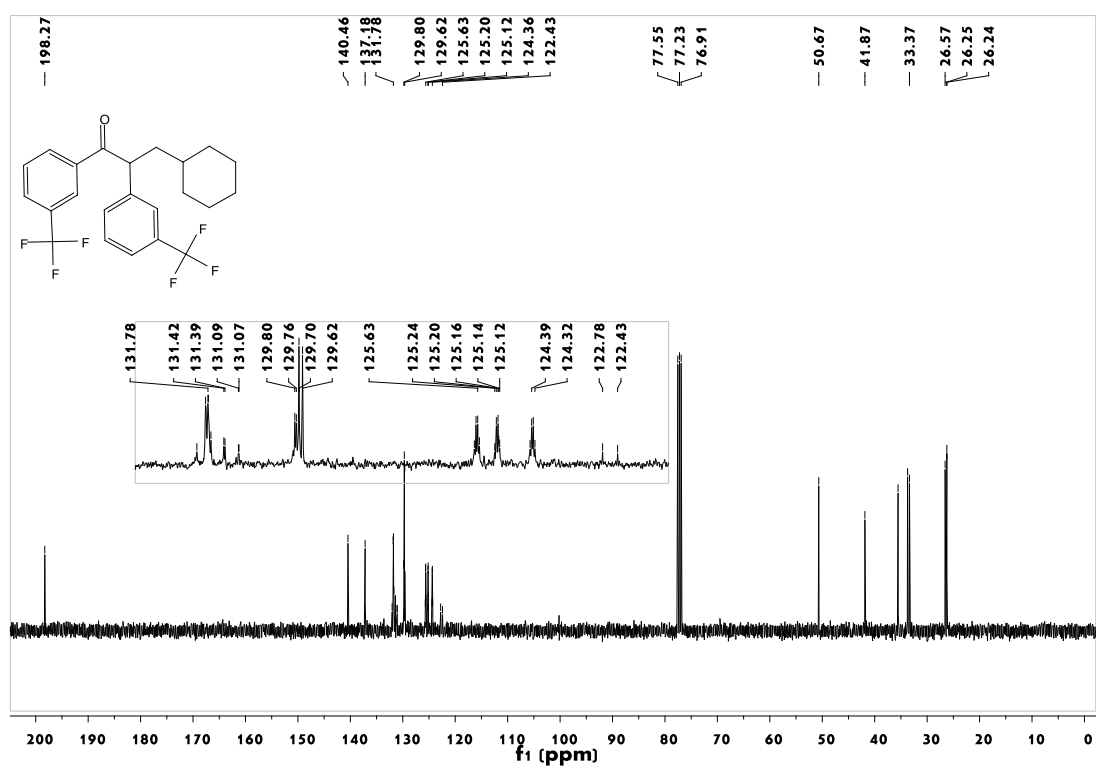

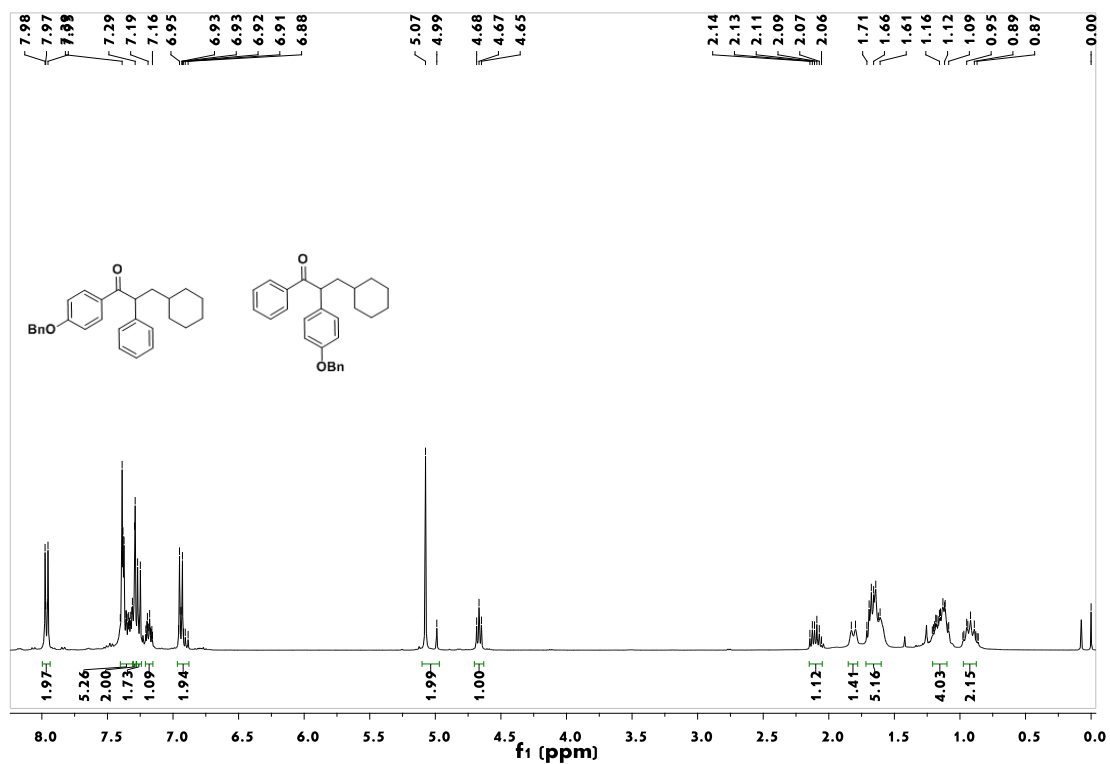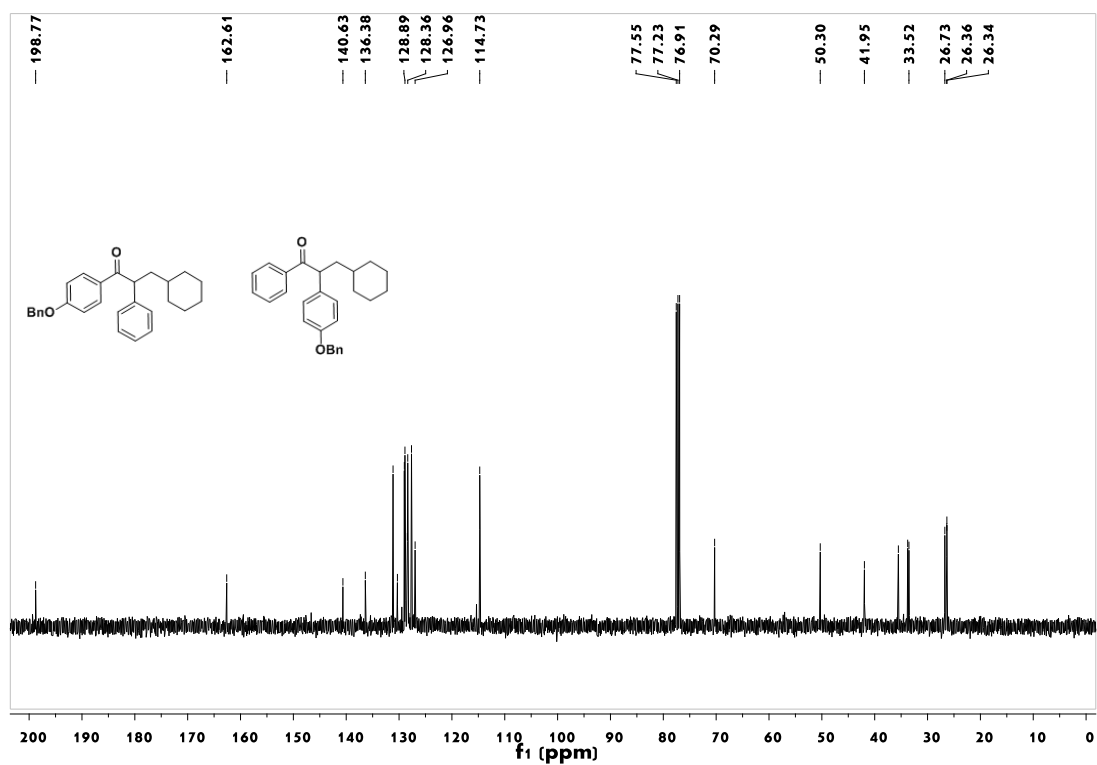

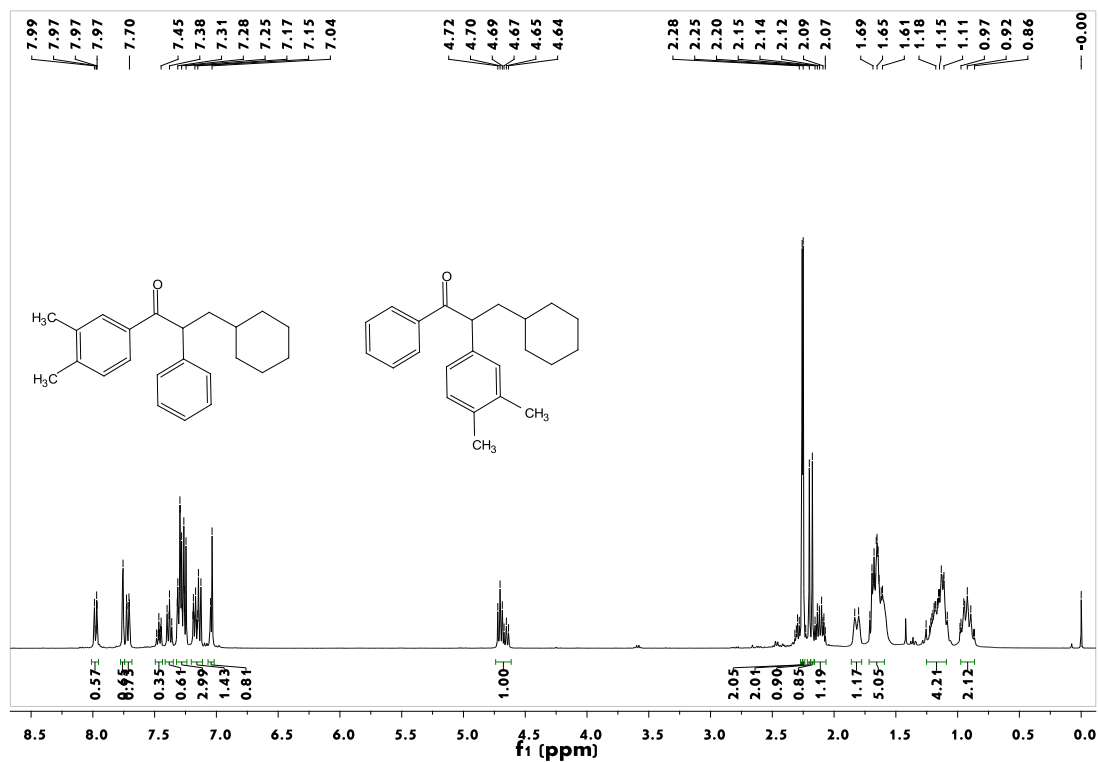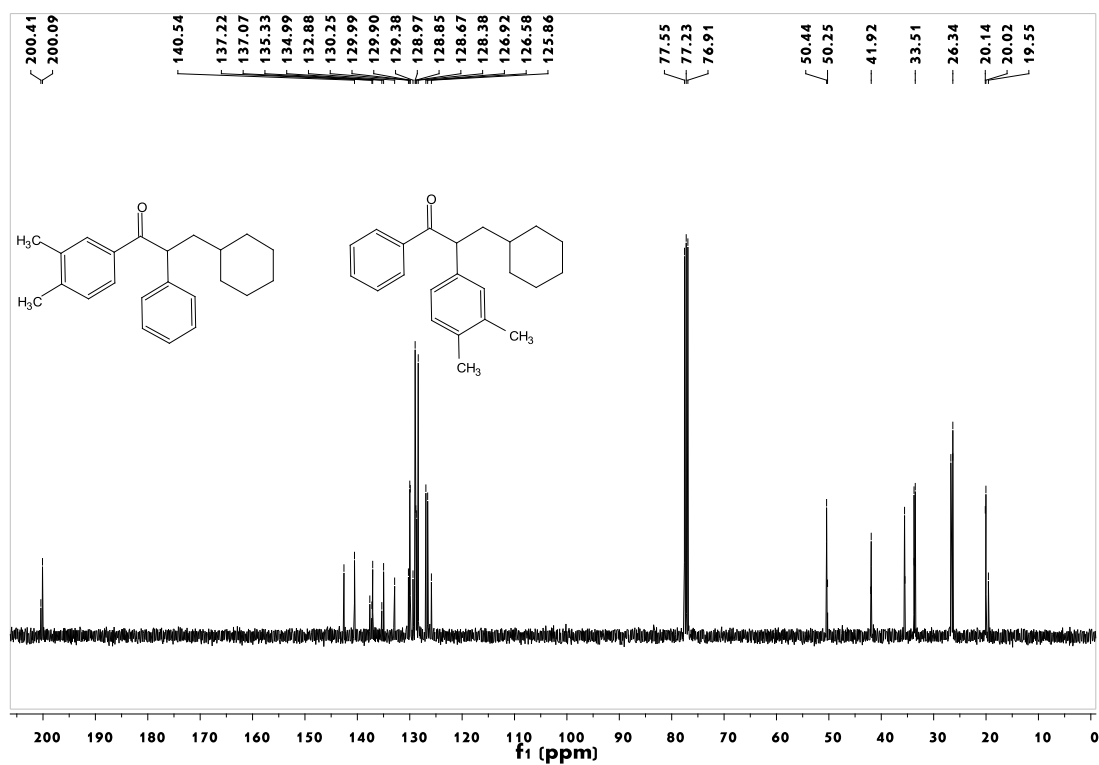

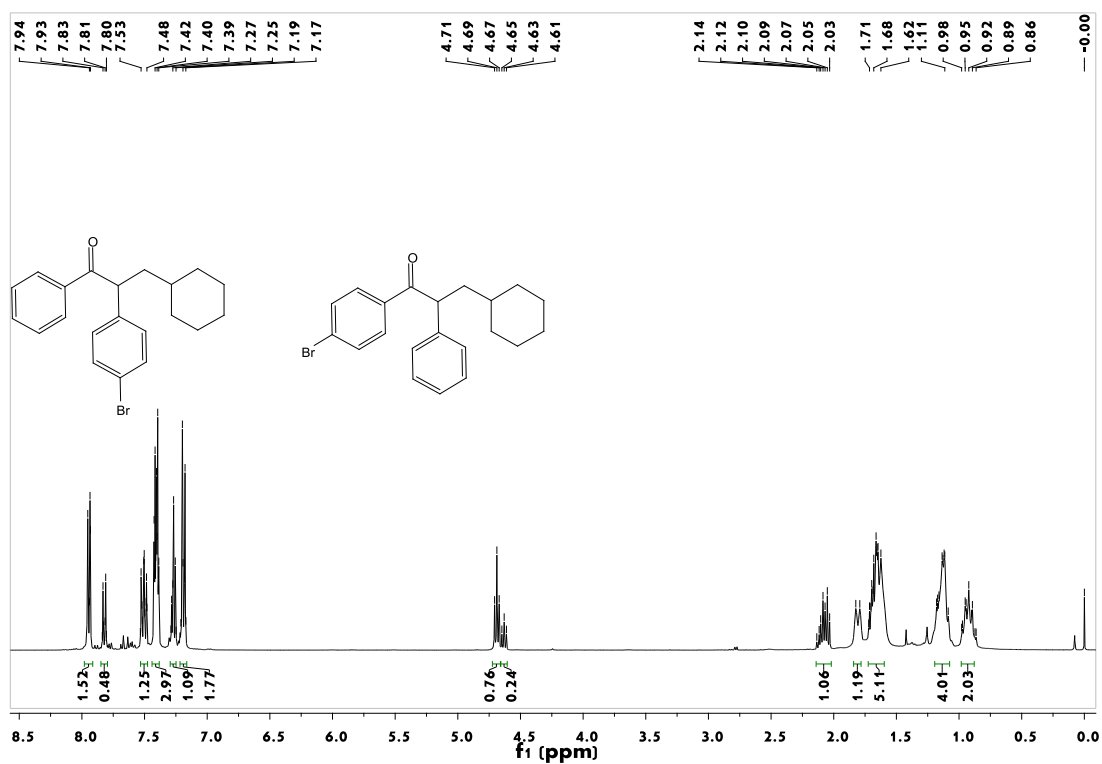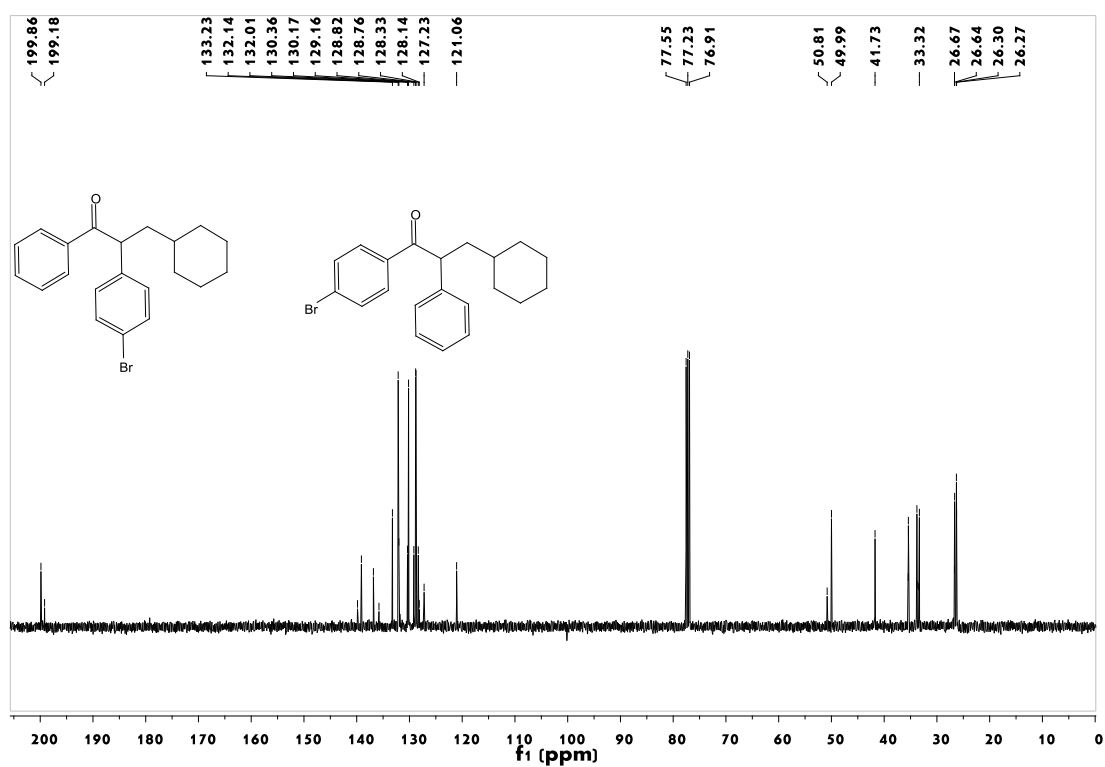



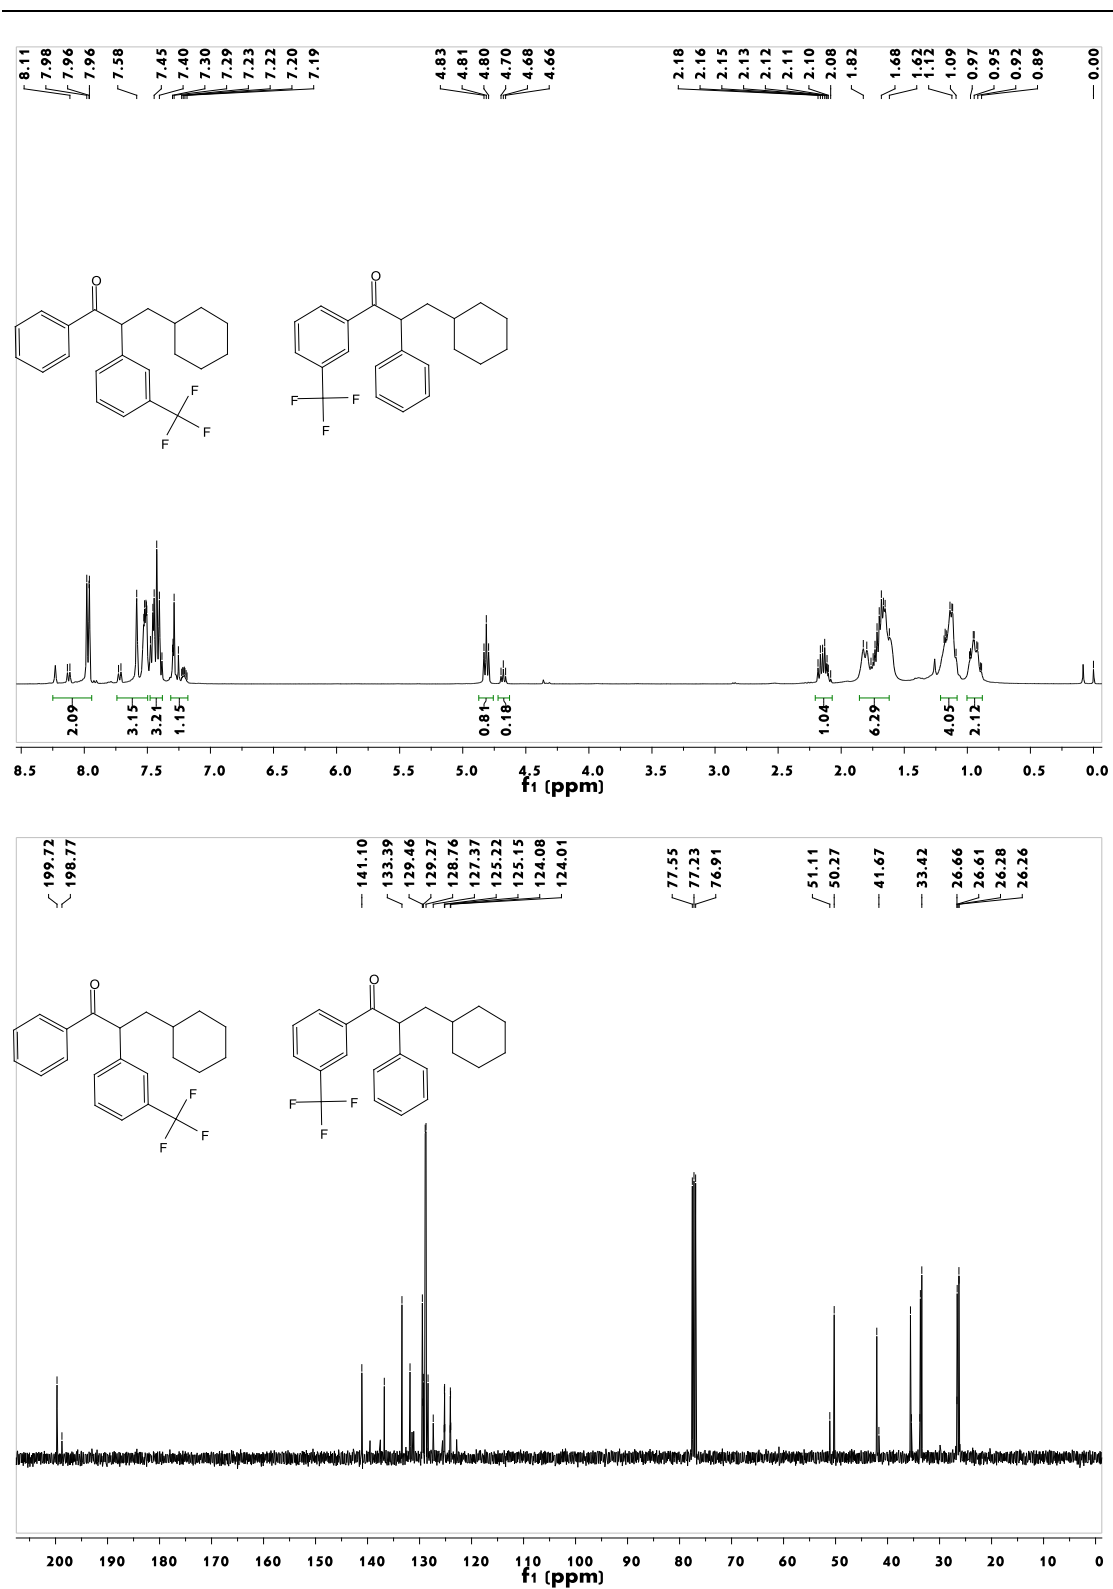

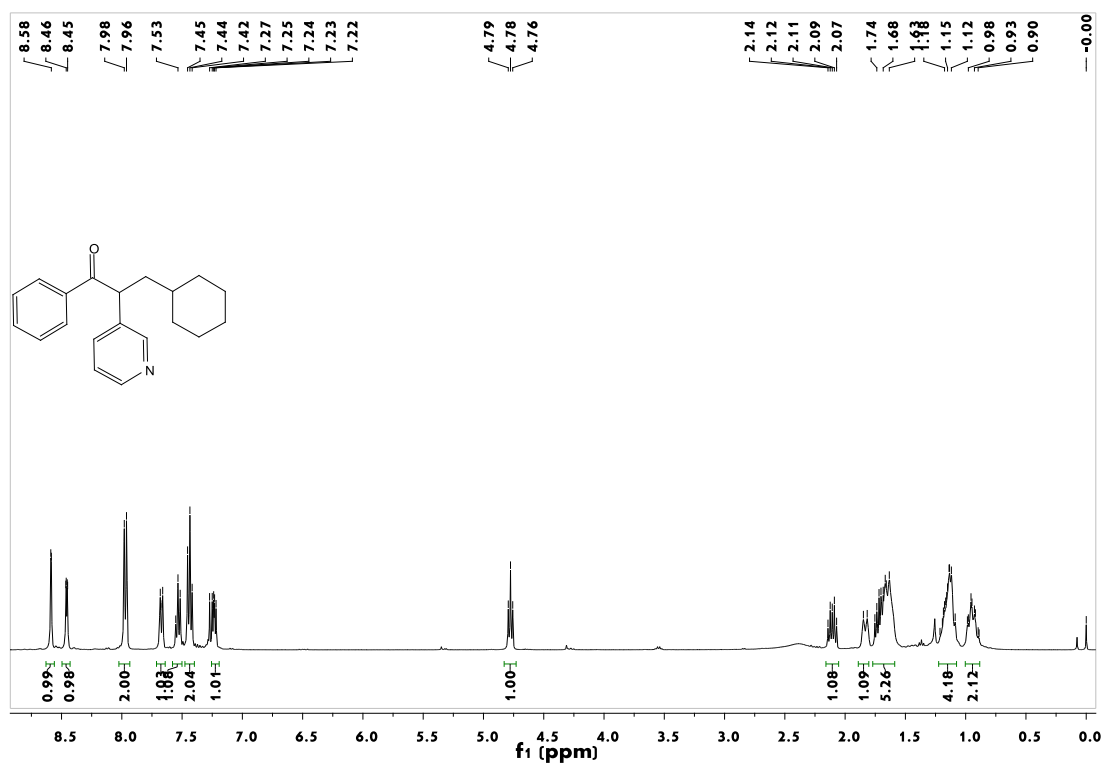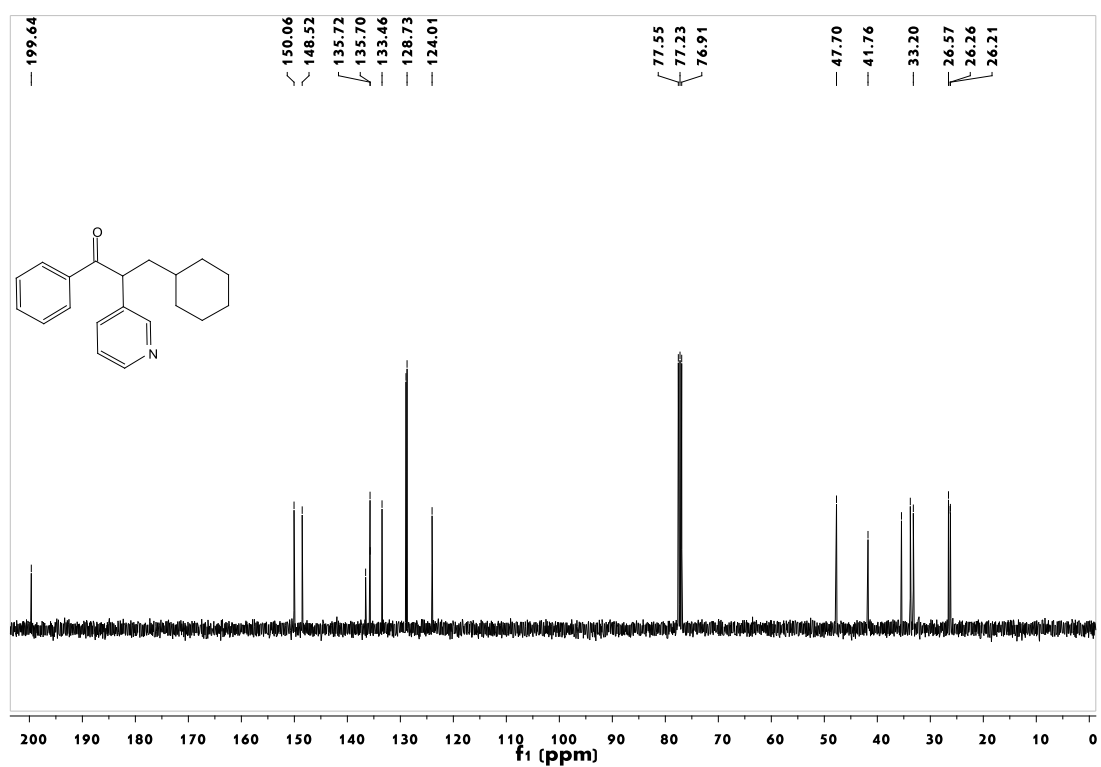

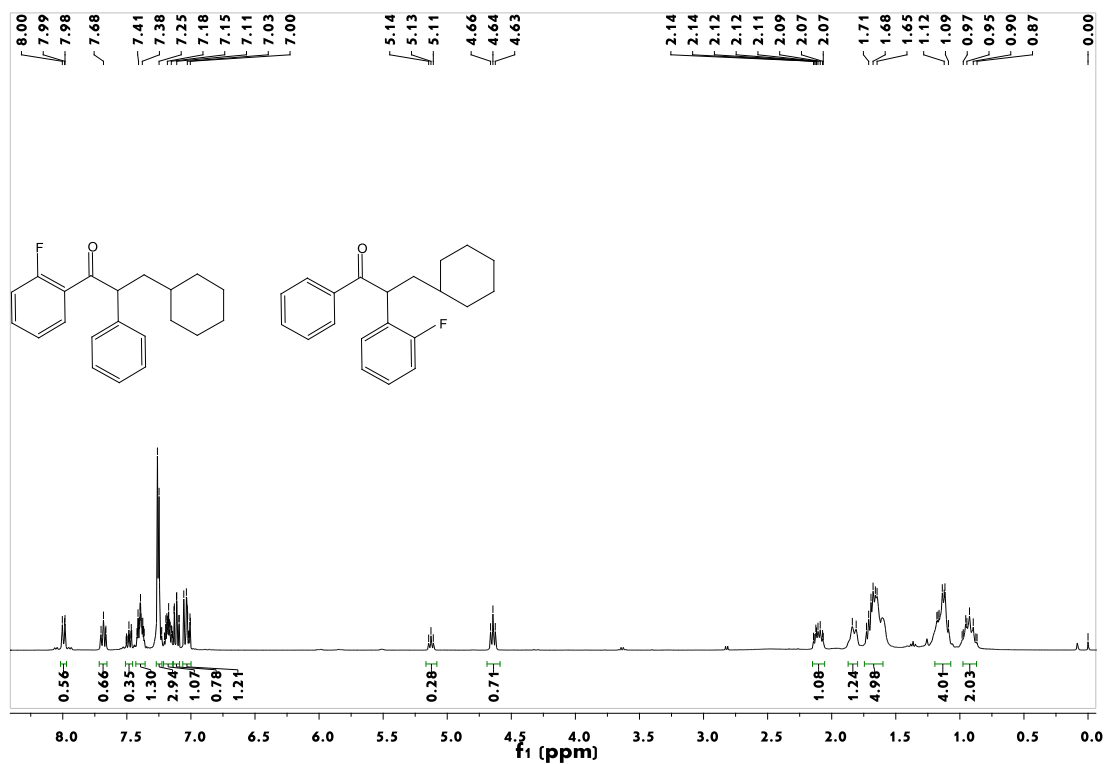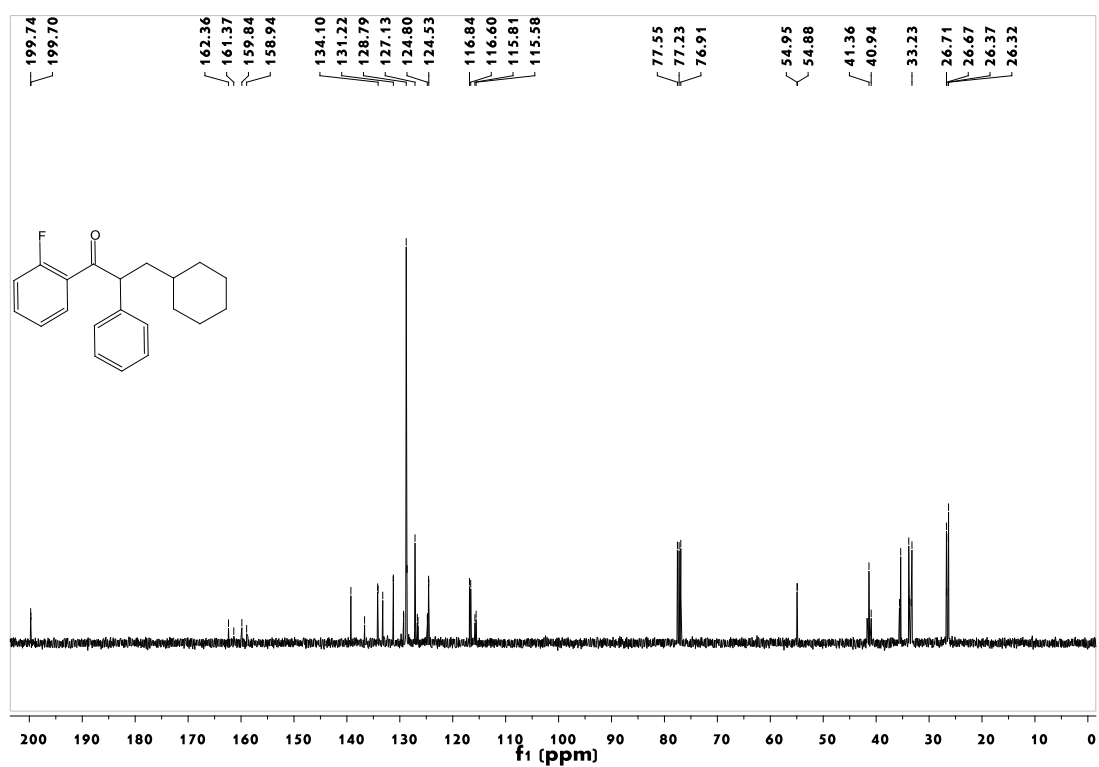

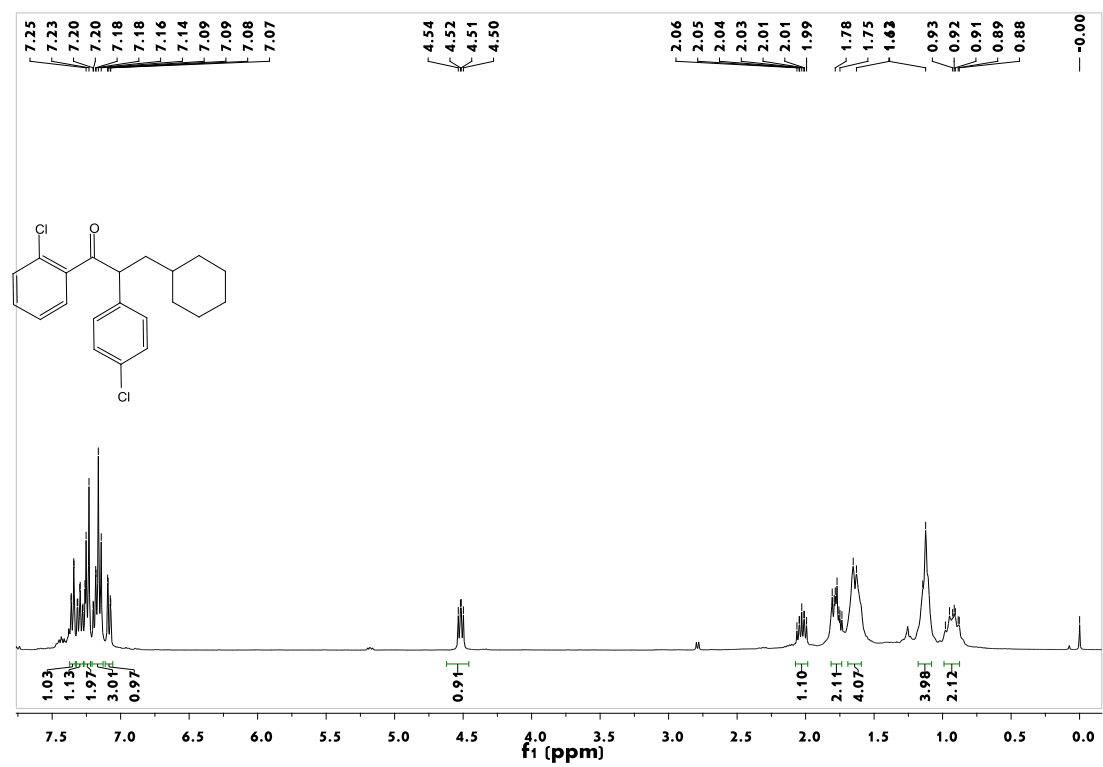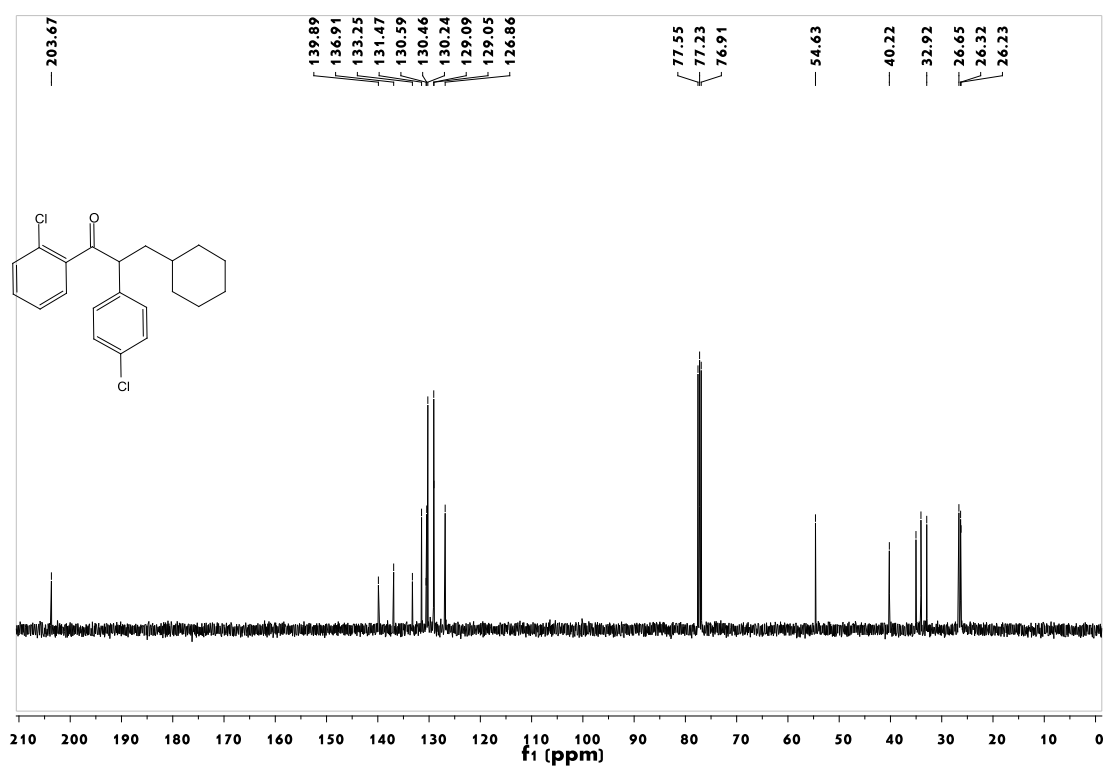

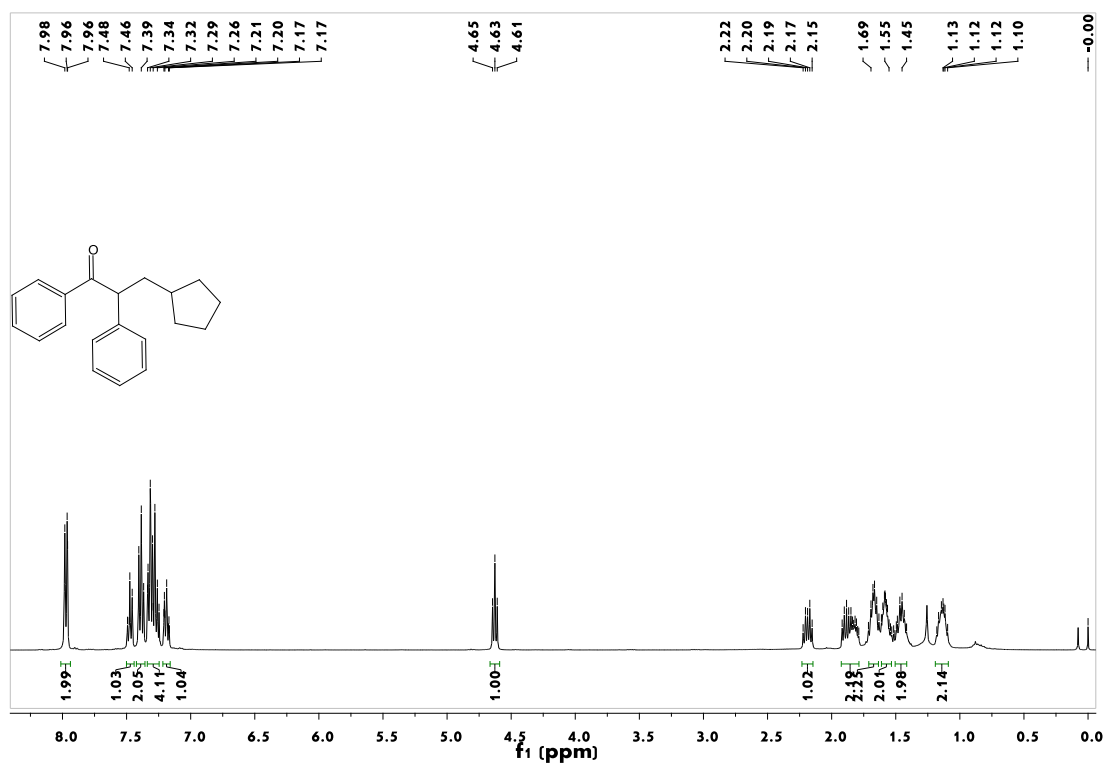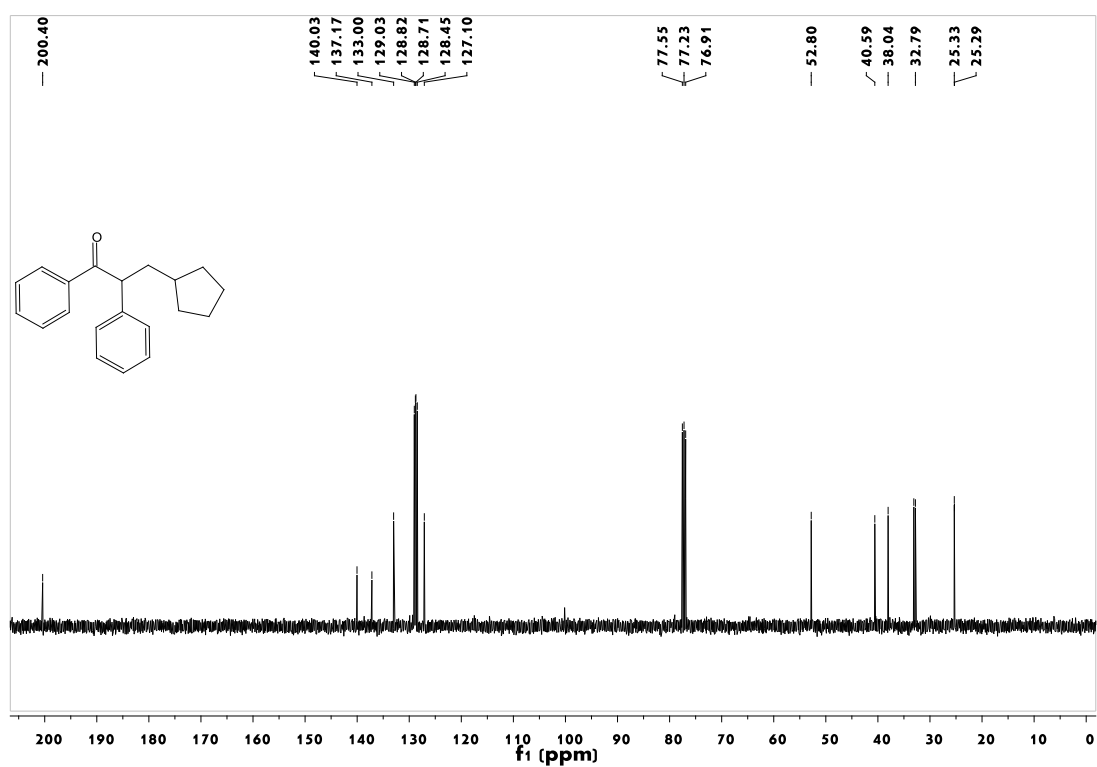

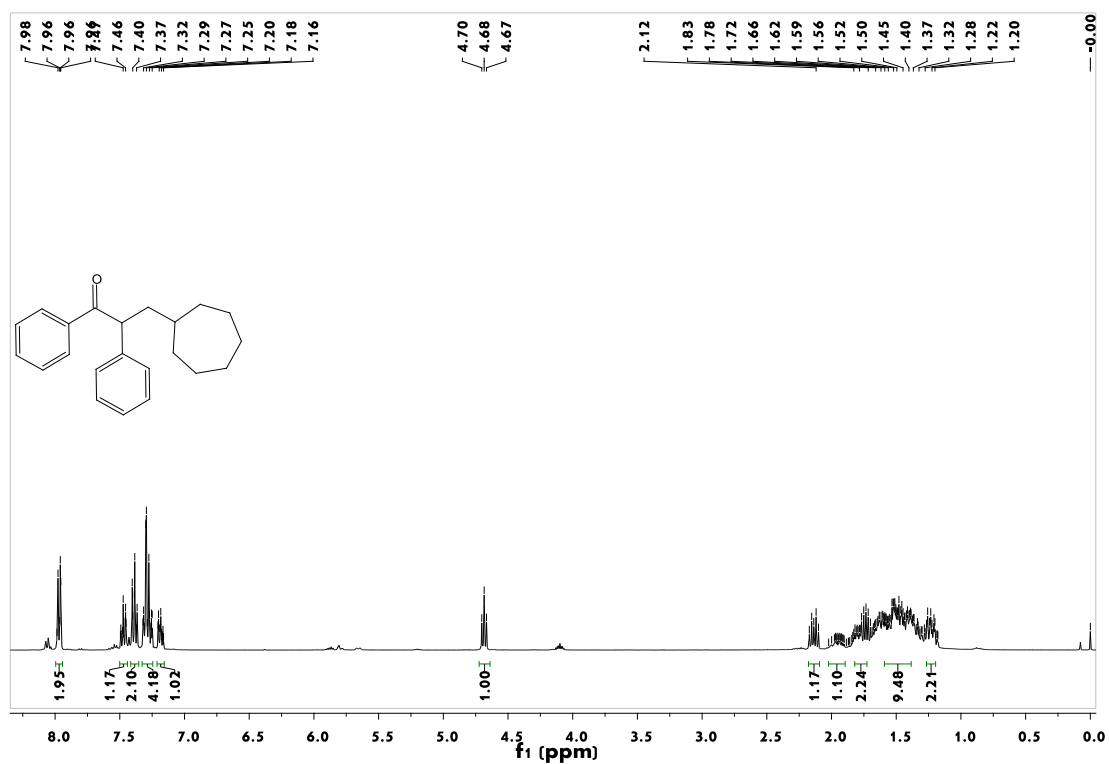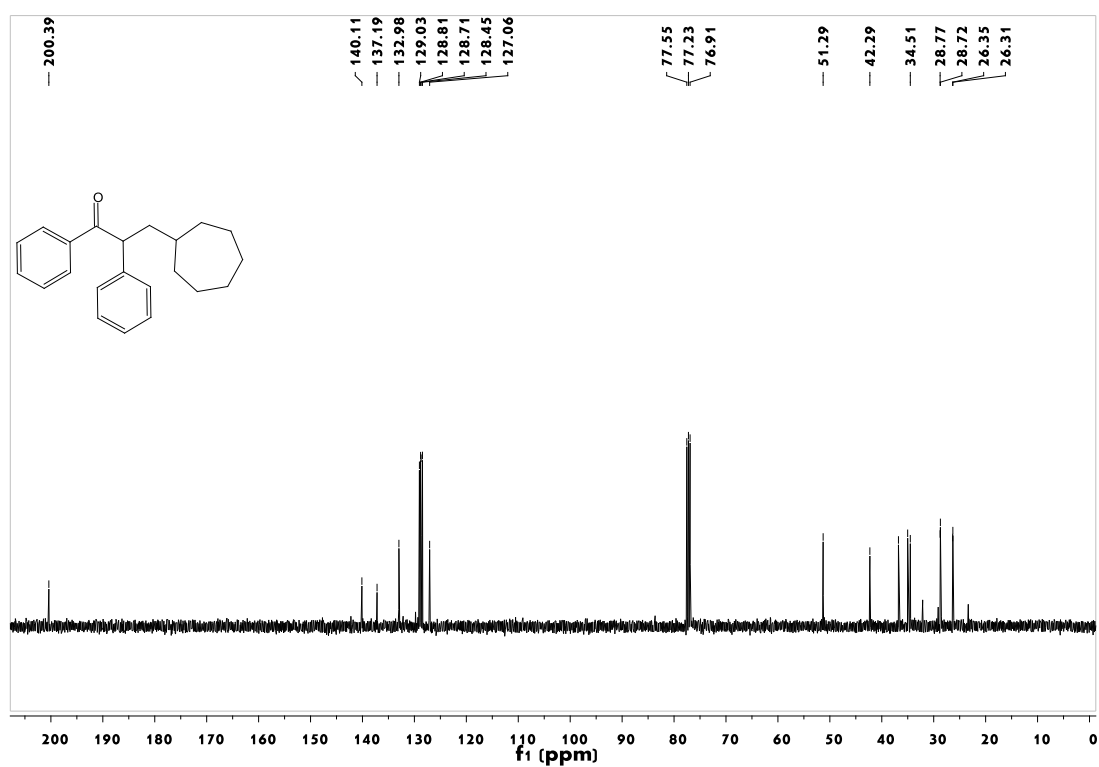

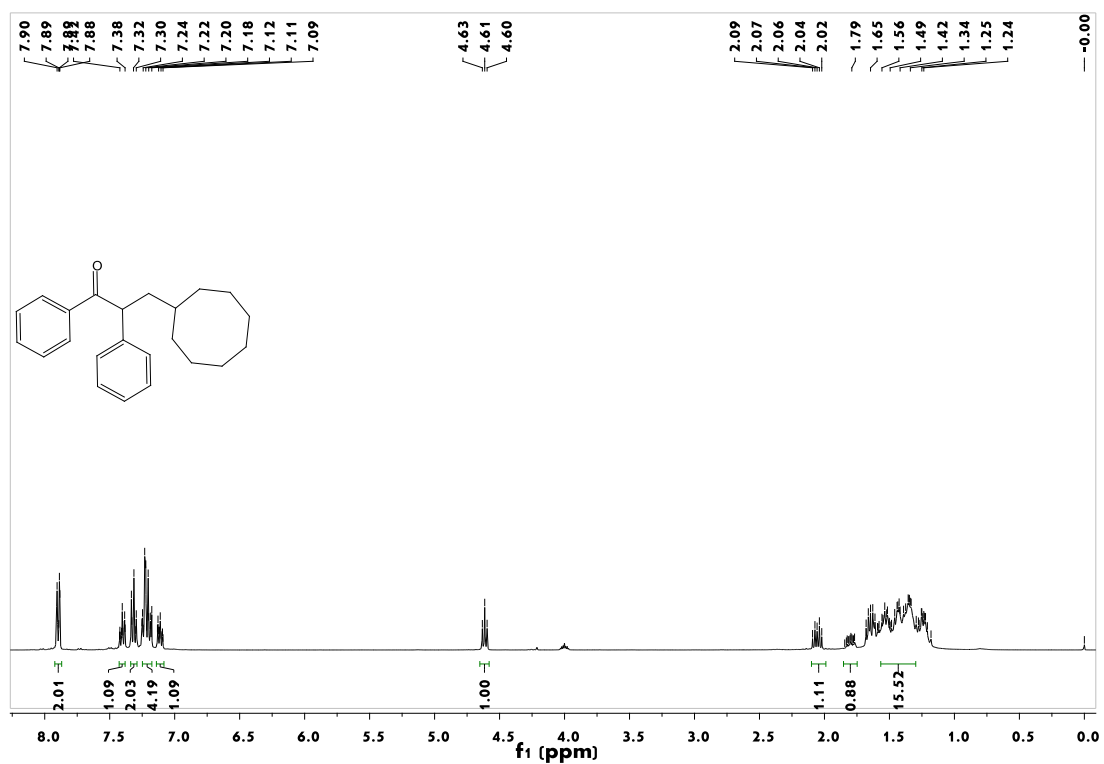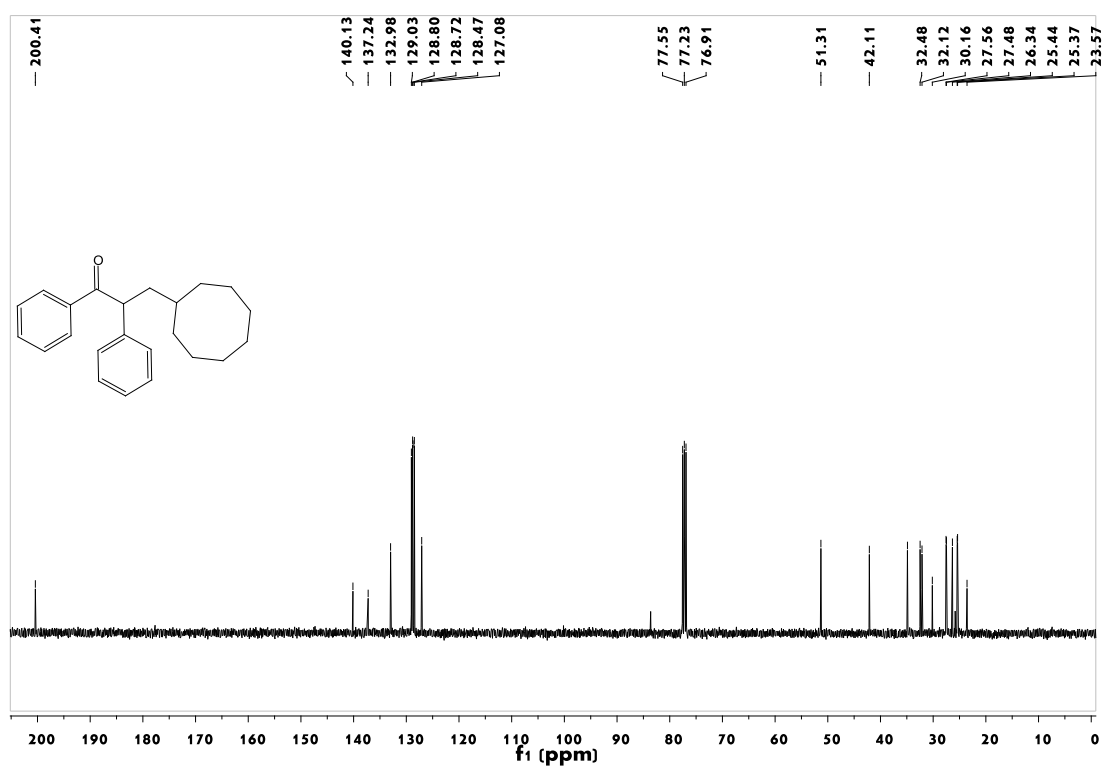

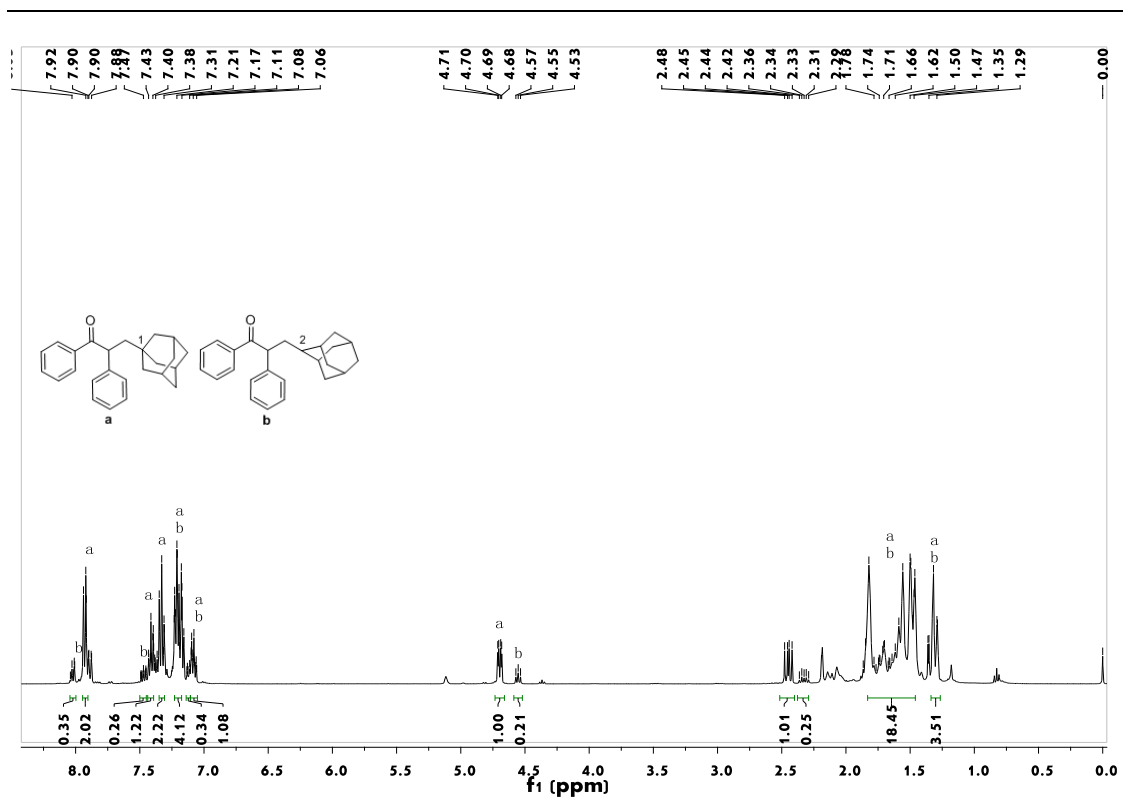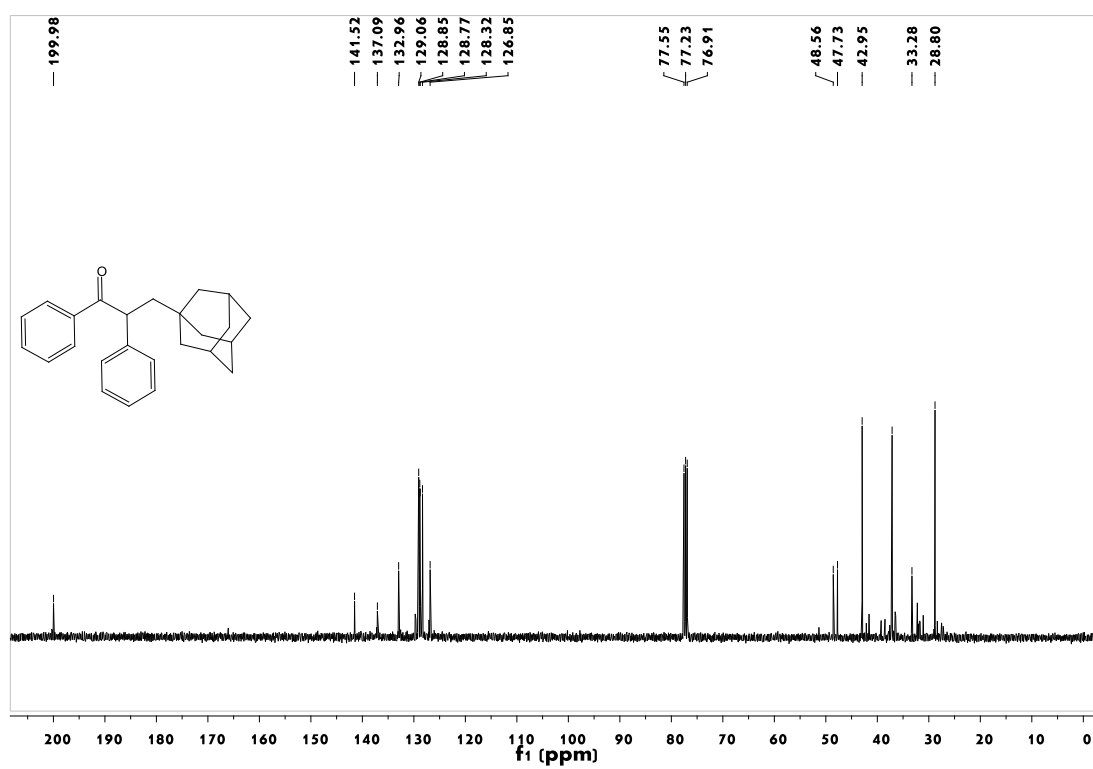



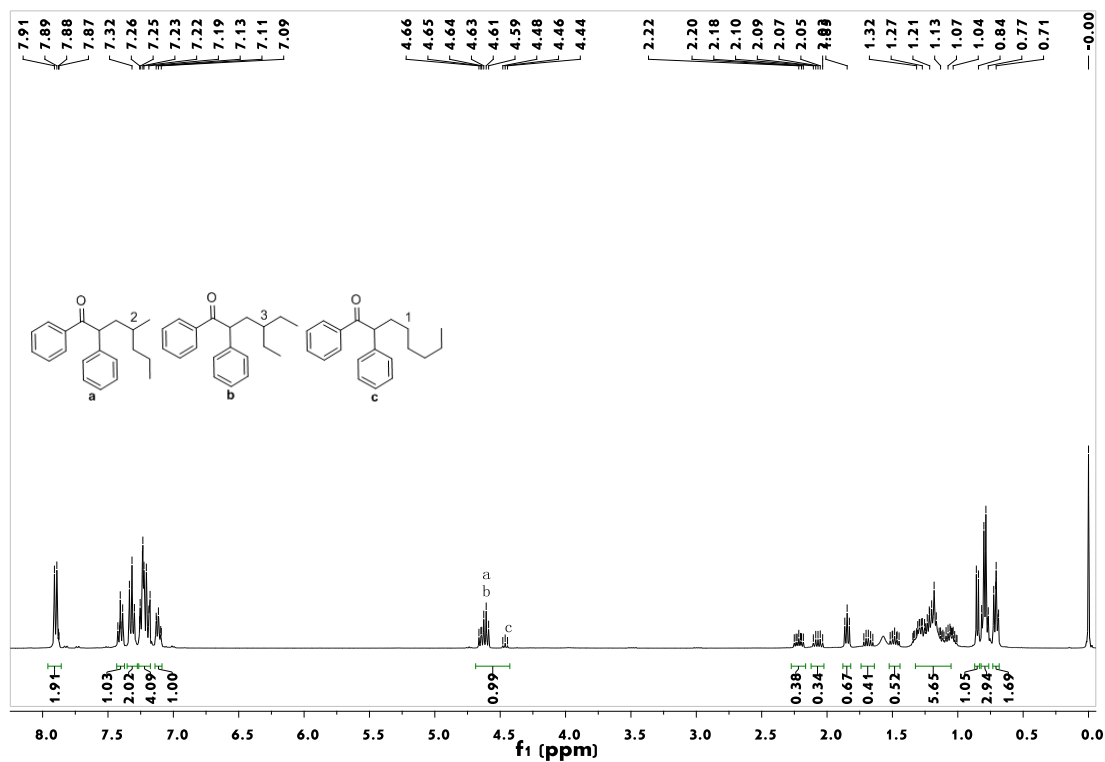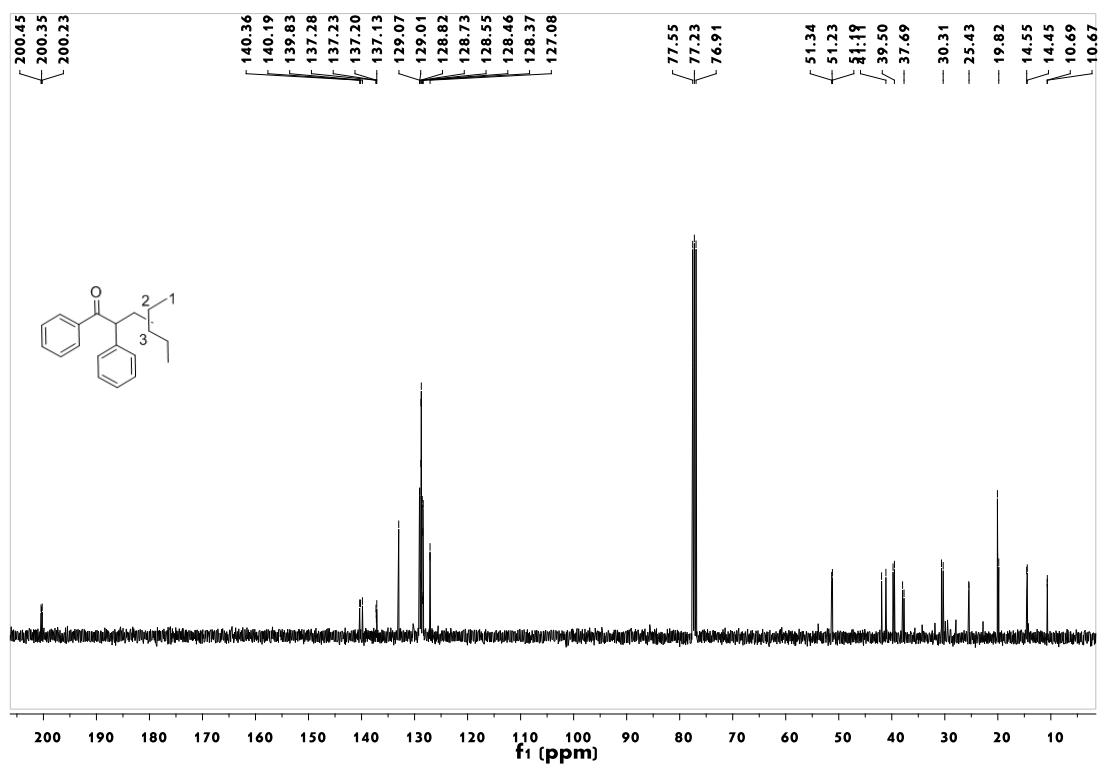

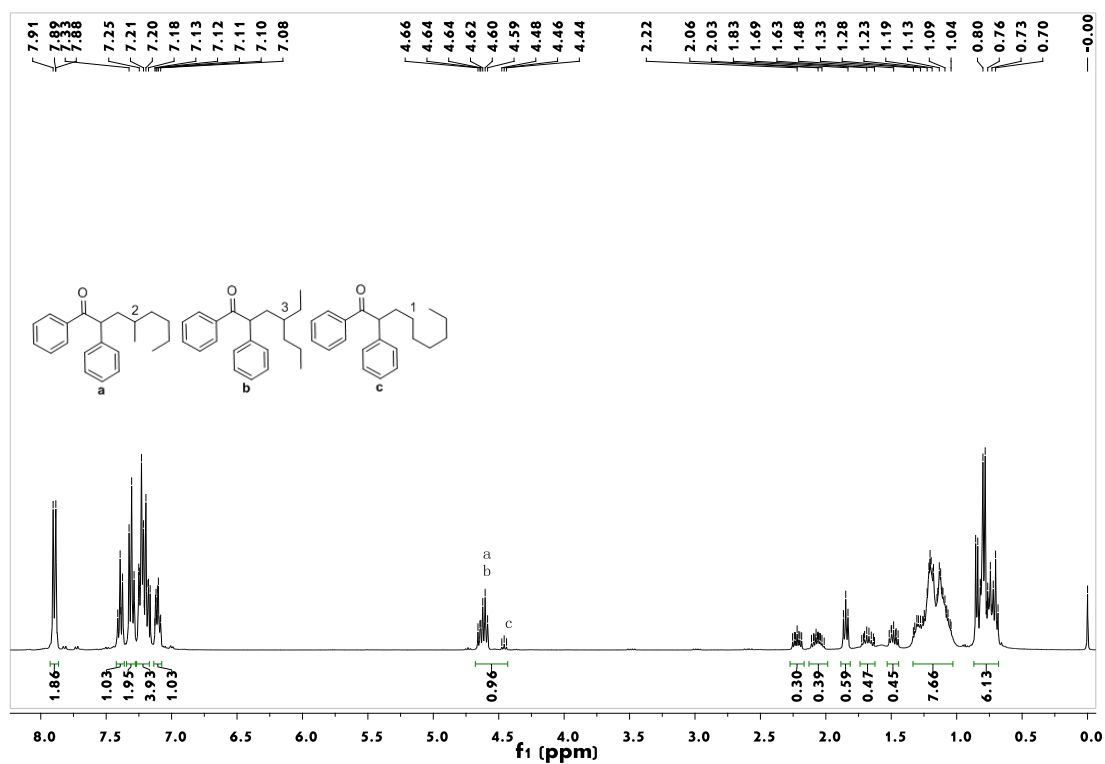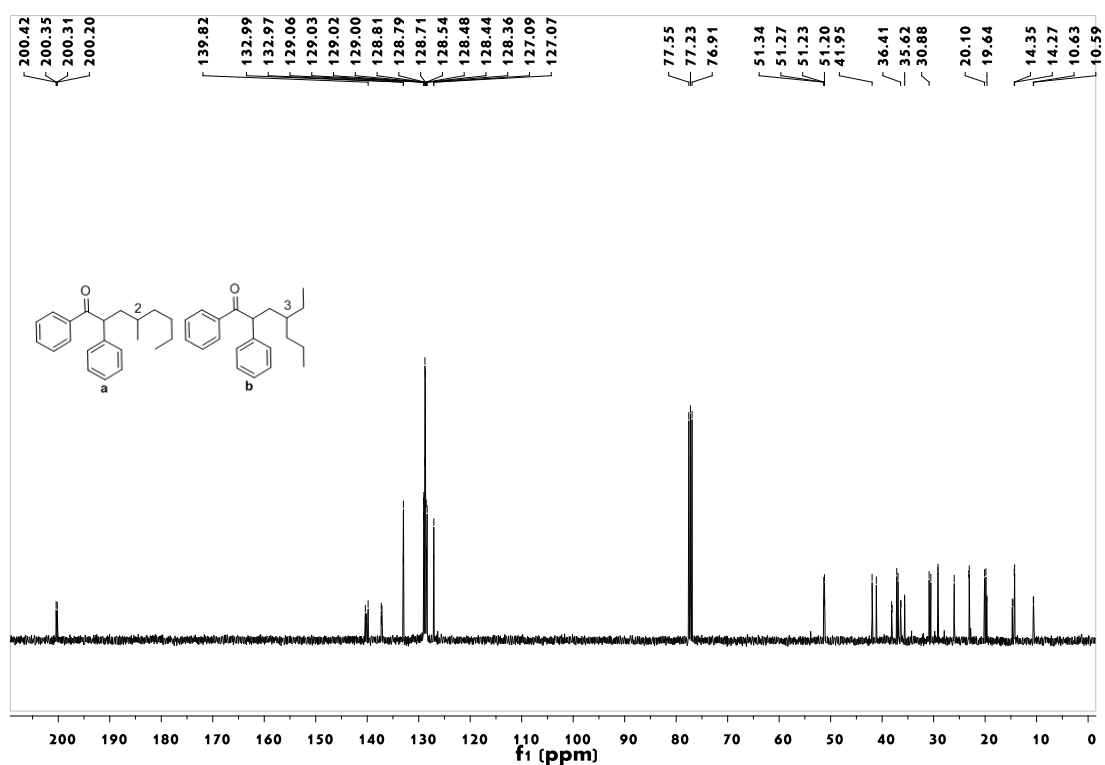

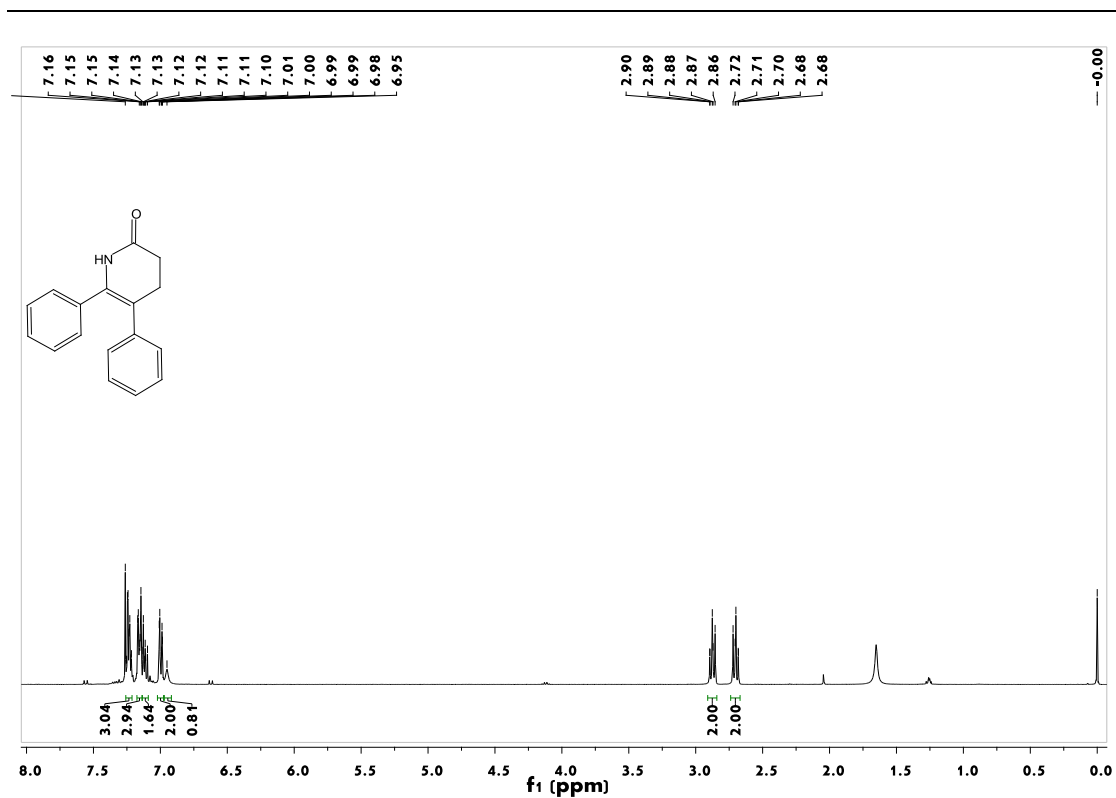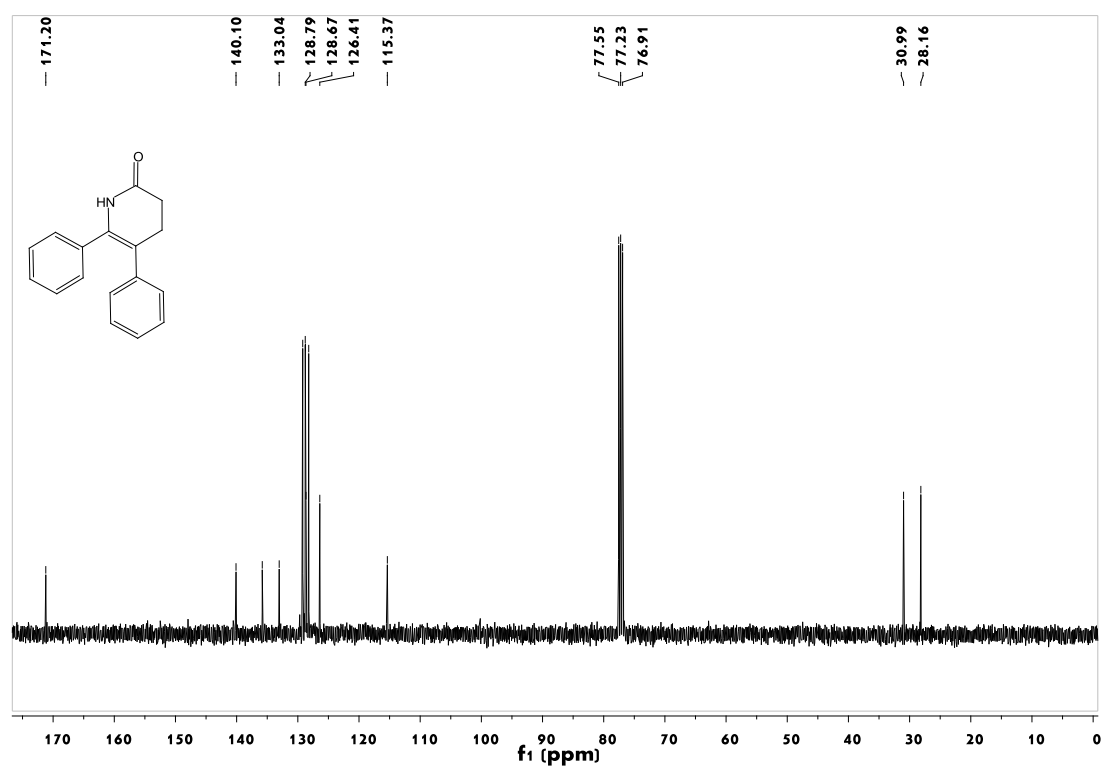

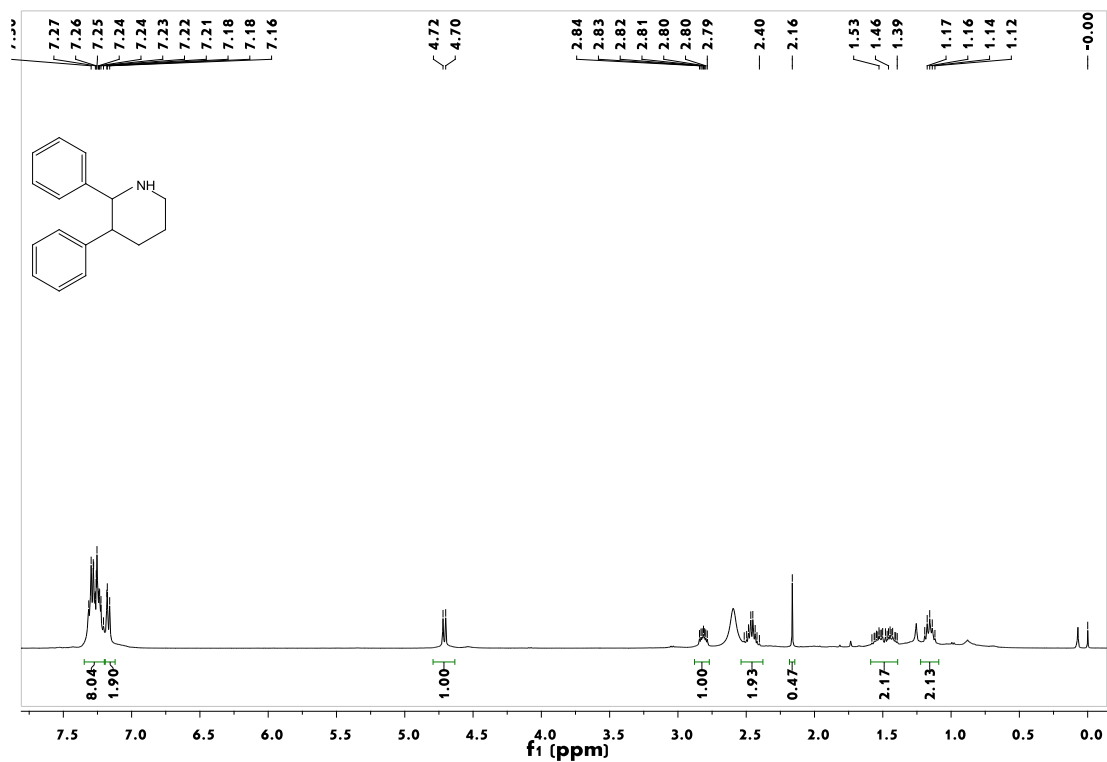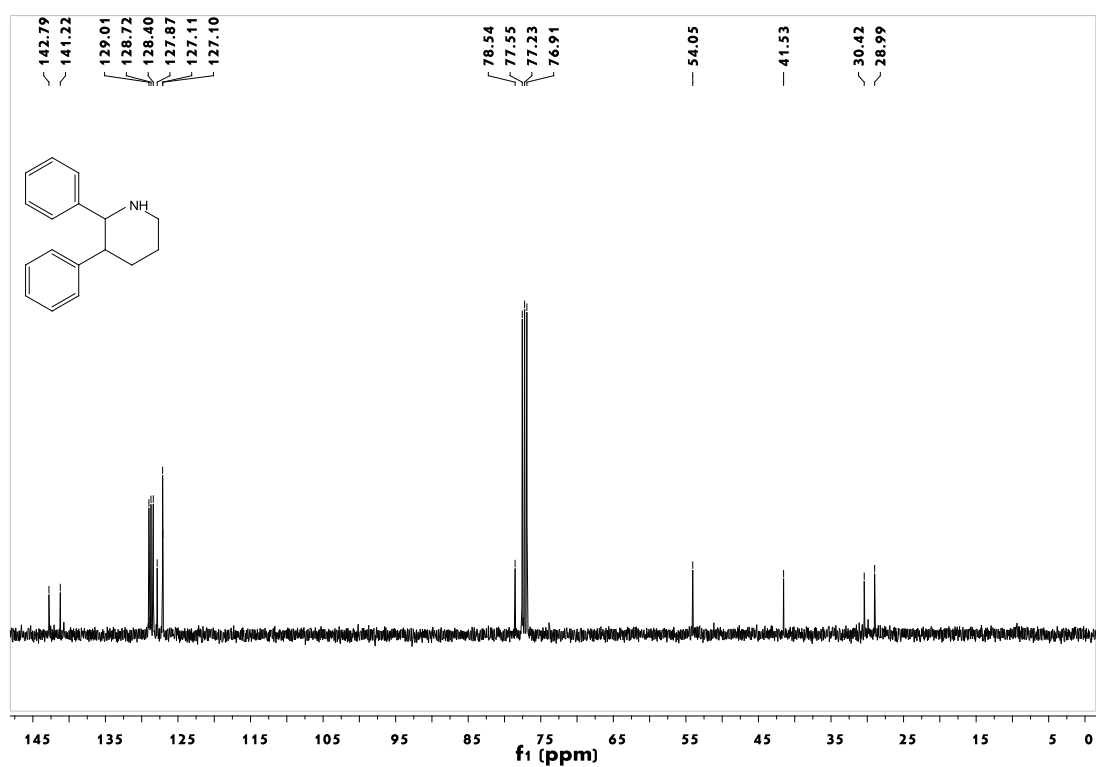

Supplement: c4qo00314d1.pdf [file c4qo00314d1.pdf]
